# Supplementary material for: Construction of heterocycle-fused tetrahydrocarbazoles through a formal [3 + 3]-annulation of 2-indolylmethanols with para-quinone methides
Source: Royal Society of Chemistry journal article supplement (doi:10.1039/d3ob00124e), 2023-01-01

## Supporting information for

### Construction of heterocyclo-fused tetrahydrocarbazoles through a formal [3+3]- annulation of 2-indolylmethanols with *para*-quinone methides

Gurdeep Singh,<sup>#</sup> Sonam Sharma,<sup>#</sup> Rajat Pandey, Rekha and Ramasamy Vijaya Anand\*

*Department of Chemical Sciences, Indian Institute of Science Education and Research  
(IISER) Mohali, Sector 81, Knowledge City, S. A. S. Nagar, Manauli (PO), Punjab –  
140306. India.*

*E-mail:* [rvijayan@iisermohali.ac.in](mailto:rvijayan@iisermohali.ac.in)

<sup>#</sup> These authors contributed equally

#### *Table of Contents*

|                                                                                      |         |
|--------------------------------------------------------------------------------------|---------|
| 1. General information                                                               | S3      |
| 2. X-ray crystallography analysis of <b>3u</b>                                       | S4      |
| 3. X-ray crystallography analysis of <b>5i</b>                                       | S5      |
| 4. X-ray crystallography analysis of <b>7h</b>                                       | S6      |
| 5. General procedure for the synthesis of tetrahydroindolo[2,3- <i>b</i> ]carbazoles | S7      |
| 6. Characterization of products <b>3a</b> to <b>3y</b>                               | S7–S18  |
| 7. General procedure for the synthesis of tetrahydrothieno[2,3- <i>b</i> ]carbazoles | S19     |
| 8. Characterization of products <b>5a</b> to <b>5k</b>                               | S19–S24 |
| 9. General procedure for the synthesis of tetrahydrothieno[3,2- <i>b</i> ]carbazoles | S24     |
| 10. Characterization of products <b>7a</b> to <b>7k</b>                              | S24–S29 |
| 11. References                                                                       | S29     |
| 12. NMR spectra of products <b>3a</b> to <b>3y</b>                                   | S30–S56 |
| 13. NMR spectra of products <b>5a</b> to <b>5k</b>                                   | S56–S68 |

|                                                         |         |
|---------------------------------------------------------|---------|
| <b>14. NMR spectra of product 7a to 7k</b>              | S68–S80 |
| <b>15. Crude <sup>1</sup>H NMR spectra of adduct 12</b> | S80     |

## Experimental Section

**1. General Information:** All reactions were carried out under an argon atmosphere in an oven-dried round bottom flask. All the solvents were distilled before use and stored under an argon atmosphere. Most of the reagents and starting materials were purchased from commercial sources and used as such. 2-indolylmethanols were prepared according to the literature procedure.<sup>1</sup> *p*-quinone methides were prepared by following a literature procedure.<sup>2</sup> Melting points were recorded on the SMP20 melting point apparatus and are uncorrected. <sup>1</sup>H, <sup>13</sup>C, and <sup>19</sup>F spectra were recorded in CDCl<sub>3</sub> and DMSO (400, 100, and 376 MHz, respectively) on Bruker FT-NMR spectrometer. Chemical shift ( $\delta$ ) values are reported in parts per million relatives to TMS, and the coupling constants (*J*) are reported in Hz. High-resolution mass spectra were recorded on Waters Q-TOF Premier-HAB213 spectrometer. FT-IR spectra were recorded on a Perkin-Elmer FTIR spectrometer. Thin-layer chromatography was performed on Merck silica gel 60 F<sub>254</sub> TLC pellets and visualized by UV irradiation and KMnO<sub>4</sub> stain. Column chromatography was carried out through silica gel (100–200 mesh) using EtOAc/hexane as eluent.

## 2. X-ray crystallographic analysis for compound **3u**:

**Table S1:** Crystal data and structure refinement for compound **3u** (CCDC 2194163)

|                                             |                                                                |
|---------------------------------------------|----------------------------------------------------------------|
| Identification code                         | XX-GS-40-RT                                                    |
| Empirical formula                           | C <sub>45</sub> H <sub>43</sub> FN <sub>2</sub> O              |
| Formula weight                              | 646.81                                                         |
| Temperature/K                               | 298.01(1)                                                      |
| Crystal system                              | triclinic                                                      |
| Space group                                 | P-1                                                            |
| a/Å                                         | 10.7970(5)                                                     |
| b/Å                                         | 11.7144(5)                                                     |
| c/Å                                         | 17.2757(7)                                                     |
| α/°                                         | 109.155(4)                                                     |
| β/°                                         | 106.362(4)                                                     |
| γ/°                                         | 90.359(4)                                                      |
| Volume/Å <sup>3</sup>                       | 1968.69(16)                                                    |
| Z                                           | 2                                                              |
| ρ <sub>calc</sub> /cm <sup>3</sup>          | 1.091                                                          |
| μ/mm <sup>-1</sup>                          | 0.068                                                          |
| F(000)                                      | 688.0                                                          |
| Crystal size/mm <sup>3</sup>                | 0.1 × 0.1 × 0.1                                                |
| Radiation                                   | Mo Kα (λ = 0.71073)                                            |
| 2θ range for data collection/°              | 5.116 to 65.482                                                |
| Index ranges                                | -15 ≤ h ≤ 15, -17 ≤ k ≤ 16, -25 ≤ l ≤ 26                       |
| Reflections collected                       | 29730                                                          |
| Independent reflections                     | 13262 [R <sub>int</sub> = 0.0326, R <sub>sigma</sub> = 0.0555] |
| Data/restraints/parameters                  | 13262/0/449                                                    |
| Goodness-of-fit on F <sup>2</sup>           | 1.042                                                          |
| Final R indexes [I ≥ 2σ (I)]                | R <sub>1</sub> = 0.0804, wR <sub>2</sub> = 0.2270              |
| Final R indexes [all data]                  | R <sub>1</sub> = 0.1393, wR <sub>2</sub> = 0.2817              |
| Largest diff. peak/hole / e Å <sup>-3</sup> | 0.65/-0.24                                                     |

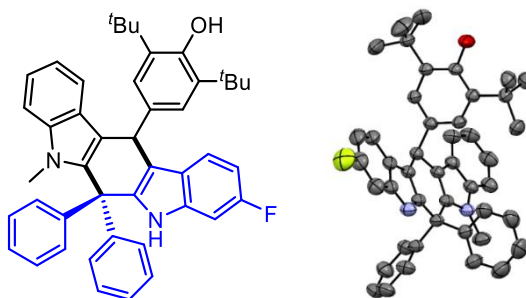

### 3. X-ray crystallographic analysis for compound **5i**:

**Table S2:** Crystal data and structure refinement for compound **5i** (CCDC2194168)

|                                             |                                                               |
|---------------------------------------------|---------------------------------------------------------------|
| Identification code                         | XX GS-78_RT                                                   |
| Empirical formula                           | C <sub>42</sub> H <sub>43</sub> Cl <sub>2</sub> NOS           |
| Formula weight                              | 680.73                                                        |
| Temperature/K                               | 298.0(1)                                                      |
| Crystal system                              | triclinic                                                     |
| Space group                                 | P-1                                                           |
| a/Å                                         | 9.2987(4)                                                     |
| b/Å                                         | 12.1896(5)                                                    |
| c/Å                                         | 17.6436(8)                                                    |
| α/°                                         | 109.223(4)                                                    |
| β/°                                         | 90.262(4)                                                     |
| γ/°                                         | 104.830(4)                                                    |
| Volume/Å <sup>3</sup>                       | 1816.78(15)                                                   |
| Z                                           | 2                                                             |
| ρ <sub>calc</sub> /cm <sup>3</sup>          | 1.244                                                         |
| μ/mm <sup>-1</sup>                          | 0.270                                                         |
| F(000)                                      | 720.0                                                         |
| Crystal size/mm <sup>3</sup>                | 0.1 × 0.1 × 0.1                                               |
| Radiation                                   | Mo Kα (λ = 0.71073)                                           |
| 2θ range for data collection/°              | 4.914 to 50.108                                               |
| Index ranges                                | -11 ≤ h ≤ 11, -14 ≤ k ≤ 14, -21 ≤ l ≤ 21                      |
| Reflections collected                       | 25964                                                         |
| Independent reflections                     | 6428 [R <sub>int</sub> = 0.0417, R <sub>sigma</sub> = 0.0327] |
| Data/restraints/parameters                  | 6428/0/404                                                    |
| Goodness-of-fit on F <sup>2</sup>           | 1.064                                                         |
| Final R indexes [I >= 2σ (I)]               | R <sub>1</sub> = 0.0575, wR <sub>2</sub> = 0.1586             |
| Final R indexes [all data]                  | R <sub>1</sub> = 0.0754, wR <sub>2</sub> = 0.1808             |
| Largest diff. peak/hole / e Å <sup>-3</sup> | 0.45/-0.22                                                    |

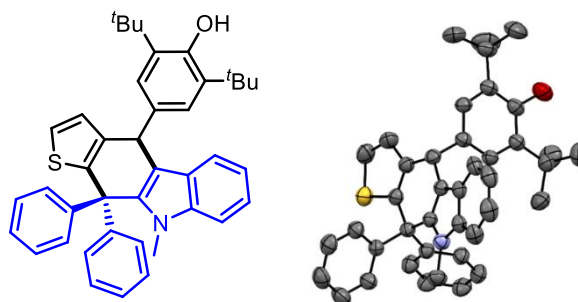

#### 4. X-ray crystallographic analysis for compound 7h:

**Table S3:** Crystal data and structure refinement for compound **7h** (CCDC 2194169)

|                                             |                                                                |
|---------------------------------------------|----------------------------------------------------------------|
| Identification code                         | XX-GS-61                                                       |
| Empirical formula                           | C <sub>41</sub> H <sub>40</sub> NO <sub>2</sub> S              |
| Formula weight                              | 610.80                                                         |
| Temperature/K                               | 298.01(1)                                                      |
| Crystal system                              | monoclinic                                                     |
| Space group                                 | P21/c                                                          |
| a/Å                                         | 10.9175(3)                                                     |
| b/Å                                         | 10.7799(3)                                                     |
| c/Å                                         | 29.2158(10)                                                    |
| α/°                                         | 90                                                             |
| β/°                                         | 91.629(3)                                                      |
| γ/°                                         | 90                                                             |
| Volume/Å <sup>3</sup>                       | 3437.00(18)                                                    |
| Z                                           | 4                                                              |
| ρ <sub>calc</sub> /cm <sup>3</sup>          | 1.180                                                          |
| μ/mm <sup>-1</sup>                          | 0.130                                                          |
| F(000)                                      | 1300.0                                                         |
| Crystal size/mm <sup>3</sup>                | 0.1 × 0.1 × 0.1                                                |
| Radiation                                   | Mo Kα (λ = 0.71073)                                            |
| 2θ range for data collection/°              | 5.312 to 65.554                                                |
| Index ranges                                | -16 ≤ h ≤ 16, -16 ≤ k ≤ 16, -44 ≤ l ≤ 43                       |
| Reflections collected                       | 50310                                                          |
| Independent reflections                     | 12028 [R <sub>int</sub> = 0.0444, R <sub>sigma</sub> = 0.0366] |
| Data/restraints/parameters                  | 12028/0/413                                                    |
| Goodness-of-fit on F <sup>2</sup>           | 1.026                                                          |
| Final R indexes [I ≥ 2σ (I)]                | R <sub>1</sub> = 0.0656, wR <sub>2</sub> = 0.1800              |
| Final R indexes [all data]                  | R <sub>1</sub> = 0.1093, wR <sub>2</sub> = 0.2239              |
| Largest diff. peak/hole / e Å <sup>-3</sup> | 0.61/-0.22                                                     |

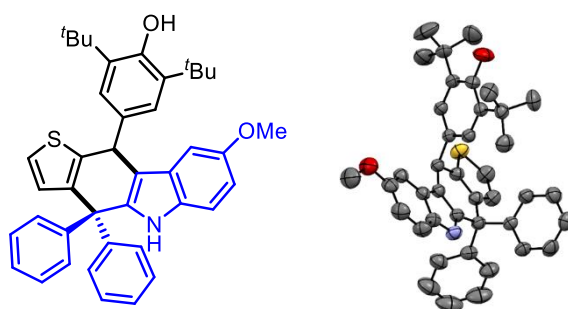

**5. General procedure for the synthesis of tetrahydroindolo[2,3-*b*]carbazole derivatives (3a-x):** TsOH (1.0 equiv.) was added to a solution of *p*-QM [**1a-j**] (30 mg, 1.0 equiv.) and 2-indolylmethanol [**2a-1**, **2n** & **2o**] (1.0 equiv.) in acetone (1.5 mL), and the resulting suspension was stirred at room temperature for 1 hour. After the reaction was complete (based on TLC analysis), the residue was then concentrated under reduced pressure, and the residue was then purified through a silica gel column using EtOAc/Hexane mixture as an eluent to get the pure products [**3a-x**].

### 6. Characterization of products 3a to 3y

**2,6-di-*tert*-butyl-4-(5-methyl-6,6-diphenyl-5,6,7,12-tetrahydroindolo[2,3-*b*]carbazol-12-yl)phenol (3a):** The reaction was performed at 0.086 mmol scale of **1a**; white solid (48.9 mg,

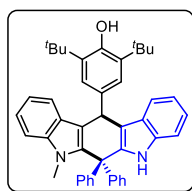

90% yield); m. p. = 269–271 °C;  $R_f$  = 0.3 (15% EtOAc in hexane);  $^1\text{H}$  NMR (400 MHz,  $\text{CDCl}_3$ )  $\delta$  7.68 – 7.64 (m, 3H), 7.60 (d,  $J$  = 7.9 Hz, 1H), 7.51 (d,  $J$  = 7.8 Hz, 1H), 7.44 – 7.37 (m, 5H), 7.35 – 7.32 (m, 2H), 7.30 – 7.29 (m, 1H), 7.28 – 7.23 (m, 3H), 7.21 (s, 2H), 7.14 – 7.08 (m, 2H), 7.05 – 7.01 (m, 1H), 5.75 (s, 1H), 4.97 (s, 1H), 3.30 (s, 3H), 1.35 (s, 18H);  $^{13}\text{C}$  { $^1\text{H}$ } NMR (100 MHz,  $\text{CDCl}_3$ )  $\delta$  152.0, 143.1, 142.4, 138.7, 138.4, 137.3, 137.1, 135.4, 135.3, 129.8, 129.3 (2C), 128.8, 128.5, 127.2, 126.6, 126.1, 125.3, 121.8, 121.5, 120.3, 120.1, 119.4, 119.0, 115.5, 114.7, 110.9, 108.8, 52.6, 39.62, 39.6, 34.3, 32.2, 30.5; FT-IR (thin film, neat): 3635, 3434, 2957, 1598, 737  $\text{cm}^{-1}$ ; HRMS (APCI):  $m/z$  calcd for  $\text{C}_{45}\text{H}_{45}\text{N}_2\text{O}$  [ $\text{M}+\text{H}$ ] $^+$ : 629.3532; found : 629.3540.

**2,6-di-*tert*-butyl-4-(3-chloro-5-methyl-6,6-diphenyl-5,6,7,12-tetrahydroindolo[2,3-*b*]carbazol-12-yl)phenol (3b):** The reaction was performed at 0.079 mmol scale of **1b**; white

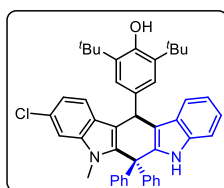

solid (50.0 mg, 96% yield); m. p. = 276–278 °C;  $R_f$  = 0.3 (15% EtOAc in hexane);  $^1\text{H}$  NMR (400 MHz,  $\text{CDCl}_3$ )  $\delta$  7.65 (s, 1H), 7.59 (d,  $J$  = 8.0 Hz, 2H), 7.46 (d,  $J$  = 7.8 Hz, 1H), 7.41 – 7.36 (m, 5H), 7.34 – 7.24 (m, 4H), 7.22

– 7.20 (m, 2H), 7.15 (s, 2H), 7.11 – 7.07 (m, 1H), 7.01 – 6.97 (m, 2H), 5.66 (s, 1H), 4.96 (s, 1H), 3.24 (s, 3H), 1.32 (s, 18H);  $^{13}\text{C}$   $\{^1\text{H}\}$  NMR (100 MHz,  $\text{CDCl}_3$ )  $\delta$  152.1, 142.8, 142.1, 138.9, 138.4, 137.8, 137.3, 135.6, 135.0, 129.7, 129.2 (2C), 128.9, 128.6, 127.7, 127.3, 126.5, 125.3, 124.6, 121.9, 121.0, 120.1, 119.7, 119.4, 115.7, 114.3, 110.9, 109.0, 52.6, 39.52, 39.5, 34.4, 32.4, 30.5; FT-IR (thin film, neat): 3633, 3458, 2957, 1603, 733  $\text{cm}^{-1}$ ; HRMS (ESI):  $m/z$  calcd for  $\text{C}_{45}\text{H}_{44}\text{ClN}_2\text{O}$   $[\text{M}+\text{H}]^+$  : 663.3142; found : 663.3146.

**2,6-di-tert-butyl-4-(2-chloro-5-methyl-6,6-diphenyl-5,6,7,12-tetrahydroindolo[2,3-**

**b]carbazol-12-yl)phenol (3c):** The reaction was performed at 0.079 mmol scale of **1c**; white

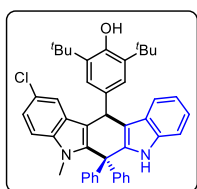

solid (49.0 mg, 94% yield); m. p. = 265–267 °C;  $R_f$  = 0.3 (15% EtOAc in hexane);  $^1\text{H}$  NMR (400 MHz,  $\text{CDCl}_3$ )  $\delta$  7.67 (s, 1H), 7.60 – 7.58 (m, 2H), 7.55 – 7.54 (m, 1H), 7.46 – 7.39 (m, 4H), 7.37 – 7.26 (m, 5H), 7.23 (d,  $J$  =

8.0 Hz, 1H), 7.17 – 7.16 (m, 2H), 7.13 – 7.09 (m, 3H), 7.03 – 6.99 (m, 1H), 5.67 (s, 1H), 5.00 (s, 1H), 3.26 (s, 3H), 1.34 (s, 18H);  $^{13}\text{C}$   $\{^1\text{H}\}$  NMR (100 MHz,  $\text{CDCl}_3$ )  $\delta$  152.2, 142.8, 142.1, 138.5, 138.3, 137.3, 136.8, 135.6, 134.8, 129.8, 129.2 (2C), 128.9, 128.6, 127.3, 127.0, 126.5, 125.3, 124.7, 121.9, 121.7, 120.1, 119.8, 119.5, 115.3, 114.3, 110.9, 109.9, 52.6, 39.5, 39.4, 34.4, 32.4, 30.5; FT-IR (thin film, neat): 3636, 3457, 2957, 1468, 732  $\text{cm}^{-1}$ ; HRMS (APCI):  $m/z$  calcd for  $\text{C}_{45}\text{H}_{44}\text{ClN}_2\text{O}$   $[\text{M}+\text{H}]^+$  : 663.3142; found : 663.3166.

**4-(2-bromo-5-methyl-6,6-diphenyl-5,6,7,12-tetrahydroindolo[2,3-b]carbazol-12-yl)-2,6-**

**di-tert-butylphenol (3d):** The reaction was performed at 0.070 mmol scale of **1d**; white solid

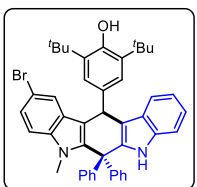

(44.8 mg, 90% yield); m. p. = 267–269 °C;  $R_f$  = 0.3 (15% EtOAc in hexane);  $^1\text{H}$  NMR (400 MHz,  $\text{CDCl}_3$ )  $\delta$  7.74 (s, 1H), 7.67 (s, 1H), 7.60 – 7.58 (m, 2H), 7.43 – 7.32 (m, 11H), 7.17 – 7.16 (m, 2H), 7.13 – 7.08 (m, 2H), 7.03 – 7.00

(m, 1H), 5.67 (s, 1H), 5.00 (s, 1H), 3.25 (s, 3H), 1.35 (s, 18H);  $^{13}\text{C}$   $\{^1\text{H}\}$  NMR (100 MHz,  $\text{CDCl}_3$ )  $\delta$  152.2, 142.7, 142.0, 138.6, 138.1, 137.3, 137.1, 135.6, 134.8, 129.8, 129.2 (2C), 128.9, 128.6, 127.7, 127.3, 126.5, 125.3, 124.2, 122.9, 121.9, 120.1, 119.5, 115.3, 114.2, 112.3,



110.9, 110.4, 52.6, 39.45, 39.4, 34.4, 32.3, 30.5; FT-IR (thin film, neat): 3634, 3432, 2957, 1466, 1229, 737  $\text{cm}^{-1}$ ; HRMS (APCI):  $m/z$  calcd for  $\text{C}_{45}\text{H}_{44}\text{BrN}_2\text{O}$   $[\text{M}+\text{H}]^+$  : 707.2637; found : 707.2658.

**2,6-di-tert-butyl-4-(2-fluoro-5-methyl-6,6-diphenyl-5,6,7,12-tetrahydroindolo[2,3-**

**b]carbazol-12-yl)phenol (3e):** The reaction was performed at 0.082 mmol scale of **1e**; white

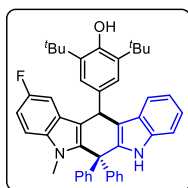

solid (44.1 mg, 83% yield); m. p. = 277–279 °C;  $R_f$  = 0.3 (15% EtOAc in

hexane);  $^1\text{H}$  NMR (400 MHz,  $\text{CDCl}_3$ )  $\delta$  7.63 (s, 1H), 7.60 – 7.57 (m, 2H), 7.45

(d,  $J$  = 7.8 Hz, 1H), 7.41 – 7.35 (m, 4H), 7.34 – 7.26 (m, 4H), 7.20 (d,  $J$  = 8.0

Hz, 1H), 7.15 (s, 2H), 7.14 – 7.12 (m, 1H), 7.11 – 7.07 (m, 2H), 7.01 – 6.97 (m, 1H), 6.94 –

6.89 (m, 1H), 5.63 (s, 1H), 4.96 (s, 1H), 3.26 (s, 3H), 1.32 (s, 18H);  $^{13}\text{C}$   $\{^1\text{H}\}$  NMR (100 MHz,

$\text{CDCl}_3$ )  $\delta$  157.5 (d,  $J_{\text{C-F}}$  = 232.4 Hz), 152.2, 142.9, 142.2, 138.7, 138.4, 137.3, 135.6, 135.0,

134.9, 129.7, 129.2 (2C), 128.9, 128.6, 127.3, 126.5, 126.3 (d,  $J_{\text{C-F}}$  = 9.9 Hz), 125.3, 121.9,

120.1, 119.4, 115.4 (d,  $J_{\text{C-F}}$  = 4.7 Hz), 114.4, 110.9, 109.6 (d,  $J_{\text{C-F}}$  = 26.2 Hz), 109.4 (d,  $J_{\text{C-F}}$  =

9.8 Hz), 105.1 (d,  $J_{\text{C-F}}$  = 23.5 Hz), 52.7, 39.6, 39.5, 34.4, 32.5, 30.5;  $^{19}\text{F}$   $\{^1\text{H}\}$  NMR (376 MHz,

$\text{CDCl}_3$ )  $\delta$  -125.1; FT-IR (thin film, neat): 3636, 2956, 1484, 1149, 737  $\text{cm}^{-1}$ ; HRMS (ESI):  $m/z$

calcd for  $\text{C}_{45}\text{H}_{44}\text{FN}_2\text{O}$   $[\text{M}+\text{H}]^+$  : 647.3438; found : 647.3463.

**2,6-di-tert-butyl-4-(2-methoxy-5-methyl-6,6-diphenyl-5,6,7,12-tetrahydroindolo[2,3-**

**b]carbazol-12-yl)phenol (3f):** The reaction was performed at 0.079 mmol scale of **1f**; white

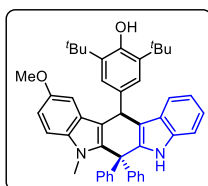

solid (39.3 mg, 75% yield); m. p. = 159–161 °C;  $R_f$  = 0.2 (15% EtOAc in

hexane);  $^1\text{H}$  NMR (400 MHz,  $\text{CDCl}_3$ )  $\delta$  7.67 (s, 1H), 7.60 (d,  $J$  = 7.5 Hz,

2H), 7.40 – 7.37 (m, 5H), 7.33 – 7.25 (m, 4H), 7.22 – 7.20 (m, 1H), 7.19 (s,

2H), 7.12 – 7.07 (m, 2H), 7.00 – 6.95 (m, 2H), 6.83 (dd,  $J$  = 8.8, 2.4 Hz, 1H), 5.64 (s, 1H), 4.95

(s, 1H), 3.77 (s, 3H), 3.24 (s, 3H), 1.32 (s, 18H);  $^{13}\text{C}$   $\{^1\text{H}\}$  NMR (100 MHz,  $\text{CDCl}_3$ )  $\delta$  153.5,

152.0, 143.0, 142.5, 138.7, 137.5, 137.3, 135.5, 135.4, 133.6, 129.8, 129.3, 128.8, 128.5, 127.2,

127.1, 126.6, 126.3, 125.4, 121.8, 120.1, 119.3, 115.1, 114.5, 111.8, 110.9, 109.6, 101.7, 55.8,

55.7, 52.7, 39.7, 34.3, 32.3, 30.5; FT-IR (thin film, neat): 3634, 2956, 1486, 1228, 736  $\text{cm}^{-1}$ ;  
HRMS (ESI):  $m/z$  calcd for  $\text{C}_{46}\text{H}_{47}\text{N}_2\text{O}_2$   $[\text{M}+\text{H}]^+$  : 659.3638; found : 659.3655.

**2,6-di-tert-butyl-4-(5-methyl-2-nitro-6,6-diphenyl-5,6,7,12-tetrahydroindolo[2,3-**

**b]carbazol-12-yl)phenol (3g):** The reaction was performed at 0.076 mmol scale of **1g**; white

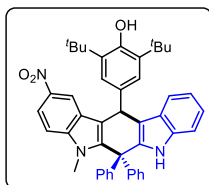

solid (37.0 mg, 72% yield); m. p. = 278–280 °C;  $R_f$  = 0.2 (15% EtOAc in hexane);  $^1\text{H}$  NMR (400 MHz,  $\text{CDCl}_3$ )  $\delta$  8.53 (d,  $J$  = 2.2 Hz, 1H), 8.05 (dd,  $J$  = 9.0, 2.2 Hz, 1H), 7.70 (s, 1H), 7.59 – 7.57 (m, 2H), 7.43 – 7.25 (m, 9H),

7.22 (d,  $J$  = 8.0 Hz, 1H), 7.20 – 7.18 (m, 3H), 7.12 – 7.08 (m, 1H), 7.01 – 6.97 (m, 1H), 5.72 (s, 1H), 5.01 (s, 1H), 3.31 (s, 3H), 1.32 (s, 18H);  $^{13}\text{C}$   $\{^1\text{H}\}$  NMR (100 MHz,  $\text{CDCl}_3$ )  $\delta$  152.5, 142.1, 141.6, 141.3, 141.2, 140.1, 138.2, 137.4, 136.0, 134.4, 129.7, 129.12 (2C), 129.1, 128.8, 127.6, 126.3, 125.3, 125.2, 122.2, 120.1, 119.6, 118.2, 117.6, 117.3, 113.7, 111.0, 108.8, 52.7, 39.4, 34.4, 32.8, 30.5; FT-IR (thin film, neat): 3631, 3428, 2957, 1483, 735  $\text{cm}^{-1}$ ; HRMS (APCI):  $m/z$  calcd for  $\text{C}_{45}\text{H}_{44}\text{N}_3\text{O}_3$   $[\text{M}+\text{H}]^+$  : 674.3383; found : 674.3416.

**4-(5-benzyl-6,6-diphenyl-5,6,7,12-tetrahydroindolo[2,3-b]carbazol-12-yl)-2,6-di-tert-**

**butylphenol (3h):** The reaction was performed at 0.071 mmol scale of **1h**; white solid (31.9

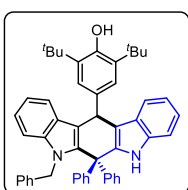

mg, 64% yield); gummy solid;  $R_f$  = 0.3 (15% EtOAc in hexane);  $^1\text{H}$  NMR (400 MHz,  $\text{DMSO-d}_6$ )  $\delta$  10.56 (s, 1H), 7.61 (d,  $J$  = 7.6 Hz, 2H), 7.42 (d,  $J$  = 8.1 Hz, 1H), 7.29 – 7.15 (m, 9H), 7.10 (t,  $J$  = 7.5 Hz, 2H), 7.04 – 6.98 (m,

1H), 6.95 – 6.91 (m, 2H), 6.88 – 6.81 (m, 5H), 6.78 – 6.76 (m, 1H), 6.64 (s, 1H), 6.19 (d,  $J$  = 7.6 Hz, 2H), 5.72 (s, 1H), 5.14 – 5.03 (m, 2H), 1.24 (s, 18H);  $^{13}\text{C}$   $\{^1\text{H}\}$  NMR (100 MHz,  $\text{DMSO-d}_6$ )  $\delta$  151.7, 142.5, 141.7, 138.9, 138.7, 137.5, 137.4, 137.1, 136.4, 129.4, 128.3, 128.2, 127.5, 126.7, 126.5, 126.48, 126.13, 126.1, 125.7, 125.3, 125.1, 124.7, 121.5, 121.1, 119.7, 119.2, 119.0, 118.3, 114.3, 112.0, 111.2, 110.4, 52.2, 48.4, 48.36, 38.5, 34.6, 30.6; FT-IR (thin film, neat): 3634, 3295, 2953, 1459, 735  $\text{cm}^{-1}$ ; HRMS (ESI):  $m/z$  calcd for  $\text{C}_{51}\text{H}_{49}\text{N}_2\text{O}$   $[\text{M}+\text{H}]^+$  : 705.3845; found : 705.3869.

**2,6-di-tert-butyl-4-(5-isopropyl-6,6-diphenyl-5,6,7,12-tetrahydroindolo[2,3-*b*]carbazol-**

**12-yl)phenol (3i):** The reaction was performed at 0.080 mmol scale of **1i**; white solid (27.8

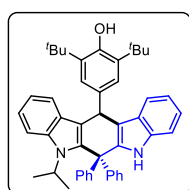

mg, 53% yield); gummy solid;  $R_f = 0.3$  (15% EtOAc in hexane);  $^1\text{H}$  NMR

(400 MHz, DMSO- $d_6$ )  $\delta$  10.56 (s, 1H), 7.73 (d,  $J = 7.8$  Hz, 2H), 7.44 – 7.33

(m, 5H), 7.30 – 7.24 (m, 5H), 7.18 – 7.12 (m, 2H), 7.08 (s, 2H), 6.99 – 6.94

(m, 1H), 6.90 – 6.84 (m, 2H), 6.78 – 6.74 (m, 1H), 6.57 (s, 1H), 5.61 – 5.60 (m, 1H), 4.20 (sept,

$J = 6.2$  Hz, 1H), 1.21 – 1.17 (m, 24H);  $^{13}\text{C}$   $\{^1\text{H}\}$  NMR (100 MHz, DMSO- $d_6$ )  $\delta$  151.7, 143.2,

141.4, 139.5, 138.9, 137.5, 137.0, 136.5, 135.0, 129.6, 129.4, 128.3, 128.2, 127.0, 126.7, 126.5,

125.2, 124.6, 121.04, 121.0, 119.8, 119.1, 118.3, 118.2, 113.6, 112.4, 111.6, 111.2, 52.4, 47.8,

38.4, 34.5, 30.6; 19.9, 19.3; FT-IR (thin film, neat): 3647, 3465, 2922, 1460, 740  $\text{cm}^{-1}$ ; HRMS

(ESI):  $m/z$  calcd for  $\text{C}_{47}\text{H}_{49}\text{N}_2\text{O}$   $[\text{M}+\text{H}]^+$  : 657.3845; found : 657.3859.

**2,6-di-tert-butyl-4-(6,6-diphenyl-5,6,7,12-tetrahydroindolo[2,3-*b*]carbazol-12-yl)phenol**

**(3j):** The reaction was performed at 0.09 mmol scale of **1a**; pale yellow solid (34.9 mg, 63%

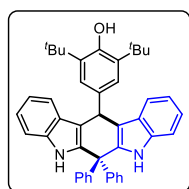

yield); m. p. = 236–238°C;  $R_f = 0.3$  (15% EtOAc in hexane);  $^1\text{H}$  NMR (400

MHz,  $\text{CDCl}_3$ )  $\delta$  7.71 (s, 2H), 7.47 – 7.42 (m, 4H), 7.37 – 7.26 (m, 6H), 7.25 –

7.23 (m, 4H), 7.18 (s, 2H), 7.12 – 7.08 (m, 2H), 7.01 – 6.97 (m, 2H), 5.62 (s,

1H), 4.95 (s, 1H), 1.32 (s, 18H);  $^{13}\text{C}$   $\{^1\text{H}\}$  NMR (100 MHz,  $\text{CDCl}_3$ )  $\delta$  152.1, 144.8, 144.7,

137.3, 135.8, 135.5, 135.0, 129.0 (2C), 128.8 (2C), 127.4, 127.2, 126.7, 125.3, 121.9, 120.3,

119.4, 115.7, 110.9, 52.6, 39.6, 34.4, 30.6; FT-IR (thin film, neat): 3637, 2954, 1470, 738  $\text{cm}^{-1}$ ;

HRMS (ESI):  $m/z$  calcd for  $\text{C}_{44}\text{H}_{43}\text{N}_2\text{O}$   $[\text{M}+\text{H}]^+$  : 615.3375; found : 615.336.

**4-(6,6-bis(4-chlorophenyl)-5-methyl-5,6,7,12-tetrahydroindolo[2,3-*b*]carbazol-12-yl)-2,6-**

**di-tert-butylphenol (3k):** The reaction was performed at 0.086 mmol scale of **1a**; white solid

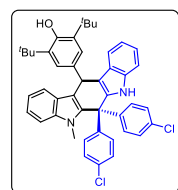

(56.0 mg, 93% yield); m. p. = 195–197 °C;  $R_f = 0.3$  (15% EtOAc in hexane);  $^1\text{H}$

NMR (400 MHz,  $\text{CDCl}_3$ )  $\delta$  7.61 – 7.57 (m, 2H), 7.53 – 7.51 (m, 2H), 7.47 (d,

$J = 7.8$  Hz, 1H), 7.38 – 7.36 (m, 2H), 7.31 – 7.21 (m, 7H), 7.15 – 7.08 (m, 4H),

7.05 – 7.01 (m, 1H), 5.69 (s, 1H), 4.96 (s, 1H), 3.27 (s, 3H), 1.31 (s, 18H);  $^{13}\text{C}$   $\{^1\text{H}\}$  NMR (100 MHz,  $\text{CDCl}_3$ )  $\delta$  152.1, 141.5, 140.8, 138.4, 137.7, 137.4, 136.0, 135.5, 134.8, 133.4, 131.0, 130.5 (2C), 129.1, 128.8, 126.5, 126.0, 125.2, 122.2, 121.9, 120.4, 120.2, 119.7, 119.3, 116.1, 115.2, 111.0, 109.0, 51.8, 39.5, 34.3, 32.3, 30.4; FT-IR (thin film, neat): 3636, 3456, 2956, 1488, 735  $\text{cm}^{-1}$ ; HRMS (APCI):  $m/z$  calcd for  $\text{C}_{45}\text{H}_{43}\text{Cl}_2\text{N}_2\text{O}$   $[\text{M}+\text{H}]^+$  : 697.2752; found : 697.2740.

**4-(6,6-bis(4-chlorophenyl)-2-methoxy-5-methyl-5,6,7,12-tetrahydroindolo[2,3-**

**b]carbazol-12-yl)-2,6-di-*tert*-butylphenol (3l):** The reaction was performed at 0.079 mmol

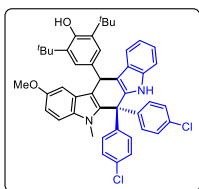

scale of **1f**; white solid (42.8 mg, 74% yield); gummy solid;  $R_f$  = 0.3 (15%

EtOAc in hexane);  $^1\text{H}$  NMR (400 MHz,  $\text{CDCl}_3$ )  $\delta$  7.56 (s, 1H), 7.50 – 7.47

(m, 2H), 7.37 (d,  $J$  = 8.1 Hz, 1H), 7.35 – 7.32 (m, 2H), 7.26 – 7.21 (m, 5H),

7.13 – 7.08 (m, 4H), 7.00 – 6.96 (m, 1H), 6.95 (d,  $J$  = 2.4 Hz, 1H), 6.84 (dd,  $J$  = 8.8, 2.4 Hz,

1H), 5.59 (s, 1H), 4.95 (s, 1H), 3.76 (s, 3H), 3.22 (s, 3H), 1.29 (s, 18H);  $^{13}\text{C}$   $\{^1\text{H}\}$  NMR (100

MHz,  $\text{CDCl}_3$ )  $\delta$  153.7, 152.1, 141.4, 140.9, 137.7, 137.4, 136.4, 135.6, 134.9, 133.6, 133.43,

133.4, 131.0, 130.5, 129.1, 128.8, 126.5, 126.2, 125.2, 122.2, 120.2, 119.7, 115.6, 115.1, 112.2,

111.0, 109.8, 101.7, 55.8, 51.9, 39.64, 39.6, 34.3, 32.4, 30.5; FT-IR (thin film, neat): 3636,

2953, 1486, 1229, 739  $\text{cm}^{-1}$ ; HRMS (ESI):  $m/z$  calcd for  $\text{C}_{46}\text{H}_{43}\text{Cl}_2\text{N}_2\text{O}_2$   $[\text{M}-\text{H}]^-$  : 725.2702;

found : 725.2720.

**4-(6,6-bis(4-fluorophenyl)-5-methyl-5,6,7,12-tetrahydroindolo[2,3-*b*]carbazol-12-yl)-2,6-**

**di-*tert*-butylphenol (3m):** The reaction was performed at 0.086 mmol scale of **1a**; white solid

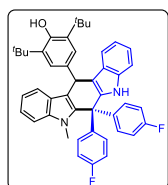

(48.2 mg, 84% yield); m. p. = 172–174  $^\circ\text{C}$ ;  $R_f$  = 0.3 (15% EtOAc in hexane);

$^1\text{H}$  NMR (400 MHz,  $\text{CDCl}_3$ )  $\delta$  7.58 – 7.55 (m, 4H), 7.46 (d,  $J$  = 7.8 Hz, 1H),

7.32 – 7.28 (m, 2H), 7.27 – 7.20 (m, 3H), 7.14 – 7.10 (m, 4H), 7.08 – 7.06 (m,

2H), 7.04 – 6.98 (m, 3H), 5.68 (s, 1H), 4.95 (s, 1H), 3.26 (s, 3H), 1.30 (s, 18H);  $^{13}\text{C}$   $\{^1\text{H}\}$  NMR

(100 MHz,  $\text{CDCl}_3$ )  $\delta$  161.82 (d,  $J_{\text{C-F}}$  = 246.2 Hz), 161.8 (d,  $J_{\text{C-F}}$  = 246.4 Hz), 152.1, 138.9 (d,

$J_{C-F} = 3.3$  Hz), 138.4, 138.3, 138.2 (d,  $J_{C-F} = 3.0$  Hz), 137.4, 136.6, 135.5, 135.0, 131.4 (d,  $J_{C-F} = 7.9$  Hz), 130.8 (d,  $J_{C-F} = 7.8$  Hz), 126.6, 126.0, 125.2, 122.1, 121.8, 120.3, 120.2, 119.6, 119.3, 115.8 (d,  $J_{C-F} = 21.2$  Hz), 115.7 (d,  $J_{C-F} = 19.3$  Hz), 115.4, 114.9, 110.9, 108.9, 51.6, 39.5, 34.3, 32.2, 30.5;  $^{19}F$  { $^1H$ } NMR (376 MHz,  $CDCl_3$ )  $\delta$  -114.8, -115.2; FT-IR (thin film, neat): 3636, 3457, 2958, 1504, 735  $cm^{-1}$ ; HRMS (APCI):  $m/z$  calcd for  $C_{45}H_{43}F_2N_2O$  [M+H] $^+$  : 665.3343; found : 665.3365.

**2,6-di-*tert*-butyl-4-(5-methyl-6,6-di-*p*-tolyl-5,6,7,12-tetrahydroindolo[2,3-*b*]carbazol-12-yl)phenol (3n):** The reaction was performed at 0.086 mmol scale of **1a**; white solid (52.2 mg,

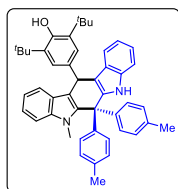

92% yield); m. p. = 267–269 °C;  $R_f = 0.3$  (15% EtOAc in hexane);  $^1H$  NMR (400 MHz, DMSO- $d_6$ )  $\delta$  10.51 (s, 1H), 7.42 (d,  $J = 8.2$  Hz, 2H), 7.32 (d,  $J = 7.8$  Hz, 1H), 7.24 (d,  $J = 7.8$  Hz, 1H), 7.20 (d,  $J = 8.2$  Hz, 1H), 7.14 – 7.10 (m, 3H), 7.09 – 7.03 (m, 6H), 7.00 – 6.96 (m, 1H), 6.89 – 6.84 (m, 2H), 6.74 (t,  $J = 7.4$  Hz, 1H), 6.53 (s, 1H), 5.59 (s, 1H), 3.04 (s, 3H), 2.21 (s, 3H), 2.17 (s, 3H), 1.14 (s, 18H);  $^{13}C$  { $^1H$ } NMR (100 MHz, DMSO- $d_6$ )  $\delta$  151.7, 140.4, 139.4, 139.1, 138.8, 137.9, 137.5, 137.3, 136.5, 136.0, 135.9, 129.4, 129.1, 128.8, 125.3, 124.6, 121.24, 121.2, 120.9, 119.3, 119.0, 118.99, 118.7, 118.3, 114.3, 112.0, 111.2, 109.3, 51.5, 38.6, 34.5, 31.8, 30.6, 20.6; FT-IR (thin film, neat): 3635, 3459, 2957, 1509, 734  $cm^{-1}$ ; HRMS (APCI):  $m/z$  calcd for  $C_{47}H_{49}N_2O$  [M+H] $^+$  : 657.3845; found : 657.3873.

**2,6-di-*tert*-butyl-4-(5-methyl-6,6-di-*m*-tolyl-5,6,7,12-tetrahydroindolo[2,3-*b*]carbazol-12-yl)phenol (3o):** The reaction was performed at 0.086mmol scale of **1a**; white solid (48.2 mg,

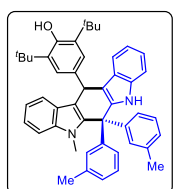

85% yield); m. p. = 247–249 °C;  $R_f = 0.3$  (15% EtOAc in hexane);  $^1H$  NMR (400 MHz, DMSO- $d_6$ )  $\delta$  10.60 (s, 1H), 7.45 (s, 1H), 7.33 (d,  $J = 7.8$  Hz, 2H), 7.28 – 7.21 (m, 3H), 7.19 – 7.13 (m, 2H), 7.11 – 7.09 (m, 3H), 7.04 – 6.99 (m, 4H), 6.93 – 6.87 (m, 2H), 6.80 – 6.76 (m, 1H), 6.58 (s, 1H), 5.61 (s, 1H), 3.08 (s, 3H), 2.25 (s, 3H), 2.14 (s, 3H), 1.18 (s, 18H);  $^{13}C$  { $^1H$ } NMR (100 MHz, DMSO- $d_6$ )  $\delta$  151.7, 143.4, 141.9,

139.0, 138.9, 137.9, 137.4, 137.36, 137.3, 137.1, 136.4, 129.9, 129.7, 128.3, 128.1, 127.6, 127.4, 126.8, 126.4, 125.3, 125.2, 124.6, 121.2, 120.9, 119.4, 119.0, 118.7, 118.2, 114.2, 112.1, 111.3, 109.4, 52.0, 38.6, 34.5, 31.8, 30.6, 21.52, 21.5, 21.35, 21.3; FT-IR (thin film, neat): 3643, 3432, 2953, 1460, 738  $\text{cm}^{-1}$ ; HRMS (ESI):  $m/z$  calcd for  $\text{C}_{47}\text{H}_{49}\text{N}_2\text{O}$   $[\text{M}+\text{H}]^+$  : 657.3845; found : 657.3862.

**2,6-di-*tert*-butyl-4-(2-methoxy-5-methyl-6,6-di-*m*-tolyl-5,6,7,12-tetrahydroindolo[2,3-**

***b*]carbazol-12-yl)phenol (3p):** The reaction was performed at 0.079 mmol scale of **1f**; white

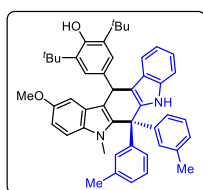

solid (39.8 mg, 73% yield); gummy solid;  $R_f = 0.3$  (15% EtOAc in hexane);

$^1\text{H}$  NMR (400 MHz,  $\text{CDCl}_3$ )  $\delta$  7.67 (s, 1H), 7.38 – 7.34 (m, 3H), 7.27 – 7.25

(m, 1H), 7.23 – 7.21 (m, 1H), 7.18 – 7.15 (m, 4H), 7.13 (s, 1H), 7.11 – 7.04

(m, 4H), 6.99 – 6.95 (m, 2H), 6.83 (dd,  $J = 8.8, 2.5$  Hz, 1H), 5.62 (s, 1H), 4.94 (s, 1H), 3.77 (s,

3H), 3.23 (s, 3H), 2.34 (s, 3H), 2.24 (s, 3H), 1.30 (s, 18H);  $^{13}\text{C}$   $\{^1\text{H}\}$  NMR (100 MHz,  $\text{CDCl}_3$ )

$\delta$  153.5, 152.0, 143.2, 142.6, 138.9, 138.21, 138.2, 137.8, 137.3, 135.5, 135.4, 133.6, 130.5,

129.8, 128.7, 128.2, 128.0, 127.9, 126.8, 126.7, 126.5, 126.4, 125.4, 121.6, 120.0, 119.2, 115.1,

114.5, 111.6, 110.9, 109.6, 101.6, 55.8, 55.76, 52.6, 39.81, 39.8, 34.3, 32.4, 30.5, 22.0, 21.8;

FT-IR (thin film, neat): 3633, 3452, 2922, 1485, 1229, 738  $\text{cm}^{-1}$ ; HRMS (APCI):  $m/z$  calcd for

$\text{C}_{48}\text{H}_{51}\text{N}_2\text{O}_2$   $[\text{M}+\text{H}]^+$  : 687.3951; found : 687.3978.

**4-(6,6-bis(3,5-dimethylphenyl)-5-methyl-5,6,7,12-tetrahydroindolo[2,3-*b*]carbazol-12-**

***yl*)-2,6-di-*tert*-butylphenol (3q):** The reaction was performed at 0.086 mmol scale of **1a**; white

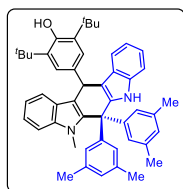

solid (53.2 mg, 90% yield); m. p. = 276–278  $^{\circ}\text{C}$ ;  $R_f = 0.3$  (15% EtOAc in

hexane);  $^1\text{H}$  NMR (400 MHz,  $\text{CDCl}_3$ )  $\delta$  7.75 (s, 1H), 7.58 (d,  $J = 7.8$  Hz, 1H),

7.43 (d,  $J = 7.8$  Hz, 1H), 7.27 – 7.24 (m, 2H), 7.22 – 7.18 (m, 3H), 7.14 (s, 2H),

7.11 – 7.05 (m, 2H), 6.99 (t,  $J = 7.4$  Hz, 1H), 6.96 (s, 1H), 6.90 – 6.87 (m, 3H), 5.68 (s, 1H),

4.93 (s, 1H), 3.28 (s, 3H), 2.30 (s, 6H), 2.22 (s, 6H), 1.29 (s, 18H);  $^{13}\text{C}$   $\{^1\text{H}\}$  NMR (100 MHz,

$\text{CDCl}_3$ )  $\delta$  151.9, 143.6, 142.6, 139.2, 138.3, 138.0, 137.8, 137.7, 137.2, 135.4, 135.3, 128.9,

128.8, 127.6, 127.0, 126.8, 126.3, 125.3, 121.4, 121.1, 120.1, 120.0, 119.1, 118.8, 115.4, 114.4, 110.9, 108.9, 52.4, 39.7, 39.67, 34.2, 32.4, 30.5, 21.9, 21.89, 21.67, 21.66; FT-IR (thin film, neat): 3643, 3461, 2956, 1467, 738  $\text{cm}^{-1}$ ; HRMS (ESI):  $m/z$  calcd for  $\text{C}_{49}\text{H}_{51}\text{N}_2\text{O}$   $[\text{M}-\text{H}]^-$  : 683.4001; found : 683.4017.

**4-(6,6-bis(4-(tert-butyl)phenyl)-5-methyl-5,6,7,12-tetrahydroindolo[2,3-*b*]carbazol-12-yl)-2,6-di-*tert*-butylphenol (3r):** The reaction was performed at 0.086 mmol scale of **1a**; white

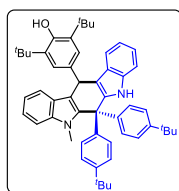

solid (39.0 mg, 61% yield); m. p. = 227–229 °C;  $R_f$  = 0.4 (15% EtOAc in hexane);  $^1\text{H}$  NMR (400 MHz,  $\text{DMSO}-d_6$ )  $\delta$  10.66 (s, 1H), 7.56 – 7.54 (m, 2H), 7.42 – 7.37 (m, 3H), 7.34 – 7.30 (m, 3H), 7.26 (d,  $J$  = 8.3 Hz, 1H), 7.21 – 7.19 (m, 3H), 7.09 – 7.03 (m, 3H), 6.94 – 6.90 (m, 2H), 6.82 – 6.79 (m, 1H), 6.59 (s, 1H), 5.64 (s, 1H), 3.07 (s, 3H), 1.26 (s, 9H), 1.22 (s, 9H), 1.20 (s, 18H);  $^{13}\text{C}$   $\{^1\text{H}\}$  NMR (100 MHz,  $\text{DMSO}-d_6$ )  $\delta$  151.6, 148.9, 148.86, 140.3, 139.3, 138.9, 138.86, 138.8, 137.8, 137.4, 137.2, 136.5, 129.2, 128.8, 125.2, 124.9, 124.5, 121.2, 120.9, 119.3, 119.0, 118.7, 118.2, 114.2, 111.8, 111.2, 111.18, 109.2, 51.4, 38.5, 34.5, 34.2, 34.1, 31.7, 31.12, 31.1, 30.6; FT-IR (thin film, neat): 3644, 3409, 2958, 1462, 734  $\text{cm}^{-1}$ ; HRMS (ESI):  $m/z$  calcd for  $\text{C}_{53}\text{H}_{59}\text{N}_2\text{O}$   $[\text{M}-\text{H}]^-$  : 739.4627; found : 739.4635.

**4-(6,6-bis(3-methoxyphenyl)-5-methyl-5,6,7,12-tetrahydroindolo[2,3-*b*]carbazol-12-yl)-2,6-di-*tert*-butylphenol (3s):** The reaction was performed at 0.086 mmol scale of **1a**; white

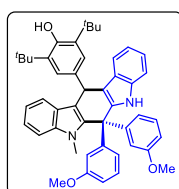

solid (45.8 mg, 77% yield); m. p. = 253–255 °C;  $R_f$  = 0.2 (15% EtOAc in hexane);  $^1\text{H}$  NMR (400 MHz,  $\text{CDCl}_3$ )  $\delta$  7.66 (s, 1H), 7.54 (d,  $J$  = 7.8 Hz, 1H), 7.45 (d,  $J$  = 7.8 Hz, 1H), 7.29 – 7.19 (m, 5H), 7.16 – 7.14 (m, 2H), 7.12 (s, 2H), 7.10 – 7.03 (m, 2H), 6.98 (t,  $J$  = 7.4 Hz, 1H), 6.93 – 6.92 (m, 1H), 6.89 (d,  $J$  = 7.8 Hz, 1H), 6.83 – 6.80 (m, 1H), 6.77 (dd,  $J$  = 8.1, 2.2 Hz, 1H), 5.66 (s, 1H), 4.91 (s, 1H), 3.74 (s, 3H), 3.69 (s, 3H), 3.30 (s, 3H), 1.28 (s, 18H);  $^{13}\text{C}$   $\{^1\text{H}\}$  NMR (100 MHz,  $\text{CDCl}_3$ )  $\delta$  159.8, 159.7, 152.2, 145.0, 144.1, 138.45, 138.4, 137.2, 137.1, 135.4, 135.3, 129.7, 129.5, 126.7, 126.2,

125.3, 122.4, 121.8, 121.7, 121.5, 120.2, 120.1 119.3, 119.0, 116.6, 116.5, 115.7, 114.8, 111.5, 111.0, 110.9, 108.9, 55.4, 55.3, 52.5, 39.6, 34.3, 32.3, 30.5; FT-IR (thin film, neat): 3624, 3434, 2955, 1483, 736  $\text{cm}^{-1}$ ; HRMS (ESI):  $m/z$  calcd for  $\text{C}_{47}\text{H}_{49}\text{N}_2\text{O}_3$   $[\text{M}+\text{H}]^+$  : 689.3743; found : 689.3773.

**4-(6,6-bis(4-methoxyphenyl)-5-methyl-5,6,7,12-tetrahydroindolo[2,3-*b*]carbazol-12-yl)-**

**2,6-di-*tert*-butylphenol (3t):** The reaction was performed at 0.086 mmol scale of **1a**; white

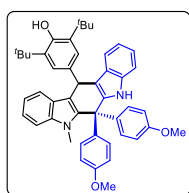

solid (48.2 mg, 81% yield); m. p. = 263–265 °C;  $R_f$  = 0.2 (15% EtOAc in hexane);  $^1\text{H}$  NMR (400 MHz,  $\text{CDCl}_3$ )  $\delta$  7.68 (s, 1H), 7.57 (d,  $J$  = 7.8 Hz, 1H), 7.50 (d,  $J$  = 8.9 Hz, 2H), 7.46 (d,  $J$  = 7.8 Hz, 1H), 7.28 – 7.18 (m, 5H), 7.15

(s, 2H), 7.11 – 7.05 (m, 2H), 7.01 – 6.98 (m, 1H), 6.90 (d,  $J$  = 8.9 Hz, 2H), 6.82 (d,  $J$  = 8.9 Hz, 2H), 5.68 (s, 1H), 4.93 (s, 1H), 3.82 (s, 3H), 3.78 (s, 3H), 3.29 (s, 3H), 1.31 (s, 18H);  $^{13}\text{C}$  { $^1\text{H}$ } NMR (100 MHz,  $\text{CDCl}_3$ )  $\delta$  158.5, 158.46, 152.0, 139.4 138.3, 137.6, 137.3, 135.44, 135.4, 135.36, 134.8, 131.0, 130.3, 126.7, 126.2, 125.3, 121.6, 121.4, 120.2, 120.0, 119.3, 119.0, 115.4, 114.3, 114.1, 113.7, 110.8, 108.8, 55.44, 55.4, 51.2, 39.6, 34.3, 32.1, 30.5; FT-IR (thin film, neat): 3624, 3391, 2956, 1507, 735  $\text{cm}^{-1}$ ; HRMS (ESI):  $m/z$  calcd for  $\text{C}_{47}\text{H}_{49}\text{N}_2\text{O}_3$   $[\text{M}+\text{H}]^+$  : 689.3743; found : 689.3766.

**2,6-di-*tert*-butyl-4-(3-fluoro-7-methyl-6,6-diphenyl-5,6,7,12-tetrahydroindolo[2,3-**

***b*]carbazol-12-yl)phenol (3u):** The reaction was performed at 0.086 mmol scale of **1a**; white

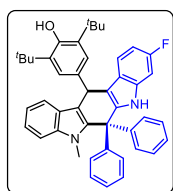

solid (36.3 mg, 65% yield); m. p. = 175–177 °C;  $R_f$  = 0.3 (15% EtOAc in hexane);  $^1\text{H}$  NMR (400 MHz,  $\text{DMSO-d}_6$ )  $\delta$  10.76 (s, 1H), 7.59 (d,  $J$  = 7.7 Hz, 2H), 7.40 – 7.36 (m, 3H), 7.32 – 7.30 (m, 2H), 7.28 – 7.20 (m, 6H), 7.09 (s,

2H), 7.06 – 7.02 (m, 1H), 6.94 – 6.90 (m, 2H), 6.71 – 6.66 (m, 1H), 6.61 (s, 1H), 5.64 (s, 1H), 3.07 (s, 3H), 1.19 (s, 18H);  $^{13}\text{C}$  { $^1\text{H}$ } NMR (100 MHz,  $\text{DMSO-d}_6$ )  $\delta$  158.7 (d,  $J_{\text{C-F}}$  = 232.2 Hz), 151.8, 142.9, 141.7, 139.5 (d,  $J_{\text{C-F}}$  = 3.4 Hz), 138.9, 137.9, 137.3, 137.2, 137.0, 136.1, 129.4, 129.1, 128.5, 128.2, 127.0, 126.8, 125.2, 124.5, 119.9 (d,  $J_{\text{C-F}}$  = 10.3 Hz), 119.4, 118.8, 114.2,



112.3, 109.3, 106.7 (d,  $J_{C-F} = 25.4$  Hz), 97.4, 97.2, 52.1, 38.41, 38.4, 34.5, 31.7, 30.6;  $^{19}\text{F}$  { $^1\text{H}$ } NMR (376 MHz,  $\text{CDCl}_3$ )  $\delta$  -121.6; FT-IR (thin film, neat): 3541, 3241, 2922, 1459, 738  $\text{cm}^{-1}$ ; HRMS (APCI):  $m/z$  calcd for  $\text{C}_{45}\text{H}_{44}\text{FN}_2\text{O}$  [ $\text{M}+\text{H}$ ] $^+$  : 647.3438; found : 647.3453.

**2,6-di-*tert*-butyl-4-(2-methoxy-7-methyl-6,6-diphenyl-5,6,7,12-tetrahydroindolo[2,3-*b*]carbazol-12-yl)phenol (3v):** The reaction was performed at 0.086 mmol scale of **1a**; white

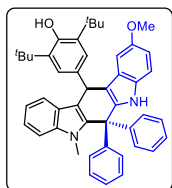

solid (31.9 mg, 56% yield); m. p. = 248–250 °C;  $R_f = 0.3$  (15% EtOAc in hexane);  $^1\text{H}$  NMR (400 MHz,  $\text{DMSO-d}_6$ )  $\delta$  10.46 (s, 1H), 7.63 (d,  $J = 7.6$  Hz, 2H), 7.40 – 7.36 (m, 2H), 7.32 – 7.30 (m, 2H), 7.28 – 7.20 (m, 6H), 7.15 (s, 2H), 7.08 – 7.02 (m, 2H), 6.92 – 6.88 (m, 1H), 6.81 (d,  $J = 2.3$  Hz, 1H), 6.62 (s, 1H), 6.58 (dd,  $J = 8.7, 2.4$  Hz, 1H), 5.59 (s, 1H), 3.62 (s, 3H), 3.10 (s, 3H), 1.22 (s, 18H);  $^{13}\text{C}$  { $^1\text{H}$ } NMR (100 MHz,  $\text{DMSO-d}_6$ )  $\delta$  152.7, 151.7, 143.2, 142.0, 139.4, 139.0, 137.9, 137.3, 136.4, 132.4, 129.4, 129.1, 128.4, 128.2, 126.9, 126.7, 125.5, 125.3, 124.6, 121.3, 119.3, 118.8, 114.2, 112.1, 111.9, 110.9, 109.3, 101.0, 55.1, 55.07, 52.2, 38.7, 34.5, 31.7, 30.6; FT-IR (thin film, neat): 3642, 3433, 2954, 1482, 736  $\text{cm}^{-1}$ ; HRMS (ESI):  $m/z$  calcd for  $\text{C}_{46}\text{H}_{47}\text{N}_2\text{O}_2$  [ $\text{M}+\text{H}$ ] $^+$  : 659.3638; found : 659.3659.

**2,6-di-*tert*-butyl-4-(2,10-dimethoxy-5-methyl-6,6-diphenyl-5,6,7,12-**

**tetrahydroindolo[2,3-*b*]carbazol-12-yl)phenol (3w):** The reaction was performed at 0.086

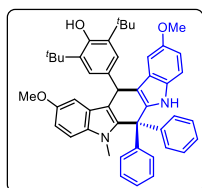

mmol scale of **1a**; white solid (45.9 mg, 84% yield); m. p. = 271–273 °C;  $R_f = 0.2$  (15% EtOAc in hexane);  $^1\text{H}$  NMR (400 MHz,  $\text{CDCl}_3$ )  $\delta$  7.59 – 7.56 (m, 2H), 7.51 (s, 1H), 7.38 – 7.35 (m, 4H), 7.31 – 7.23 (m, 4H), 7.20 (s, 2H), 7.11 – 7.06 (m, 2H), 6.86 (d,  $J = 2.4$  Hz, 1H), 6.82 – 6.79 (m, 2H), 6.71 (dd,  $J = 8.7, 2.5$  Hz, 1H), 5.57 (s, 1H), 4.96 (s, 1H), 3.72 (s, 3H), 3.70 (s, 3H), 3.23 (s, 3H), 1.31 (s, 18H);  $^{13}\text{C}$  { $^1\text{H}$ } NMR (100 MHz,  $\text{CDCl}_3$ )  $\delta$  153.6, 153.5, 152.0, 142.9, 142.6, 139.3, 137.5, 135.7, 135.4, 133.6, 132.3, 129.7, 129.3 (2C), 128.8, 128.5, 127.2, 127.1, 127.0, 126.3, 125.5, 114.9, 114.4, 111.8, 111.6, 109.6, 101.7, 101.6, 55.7, 55.6, 52.7, 39.9, 39.8, 34.3, 32.3, 30.6; FT-IR (thin film, neat):

3632, 3367, 2924, 1485, 737  $\text{cm}^{-1}$ ; HRMS (APCI):  $m/z$  calcd for  $\text{C}_{47}\text{H}_{49}\text{N}_2\text{O}_3$   $[\text{M}+\text{H}]^+$  : 689.3743; found : 689.3766.

**2,6-di-*tert*-butyl-4-(5,7-dimethyl-6,6-diphenyl-5,6,7,12-tetrahydroindolo[2,3-*b*]carbazol-**

**12-yl)phenol (3x):** The reaction was performed at 0.086 mmol scale of **1a**; white solid (47.2

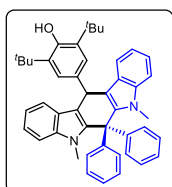

mg, 85% yield); m. p. = 195–197 °C;  $R_f$  = 0.3 (15% EtOAc in hexane);  $^1\text{H}$  NMR (400 MHz,  $\text{DMSO-d}_6$ )  $\delta$  7.55 – 7.53 (m, 2H), 7.44 – 7.39 (m, 4H), 7.36 – 7.23 (m, 8H), 7.07 – 7.03 (m, 4H), 6.94 – 6.90 (m, 2H), 6.60 (s, 1H), 5.68 (s, 1H),

3.14 (s, 6H), 1.16 (s, 18H);  $^{13}\text{C}$   $\{^1\text{H}\}$  NMR (100 MHz,  $\text{DMSO-d}_6$ )  $\delta$  151.7, 142.9, 141.9, 138.92, 138.9, 138.3, 136.0, 129.2, 129.0, 128.8, 128.7, 127.2, 127.17, 125.0, 124.7, 121.4, 119.2, 118.9, 113.9, 109.5, 52.9, 38.8, 34.4, 32.4, 30.5; FT-IR (thin film, neat): 3635, 2956, 1469, 735  $\text{cm}^{-1}$ ; HRMS (APCI):  $m/z$  calcd for  $\text{C}_{46}\text{H}_{47}\text{N}_2\text{O}$   $[\text{M}+\text{H}]^+$  : 643.3688; found : 643.3699.

**2,6-di-*tert*-butyl-4-(5-methyl-6-phenyl-6-(*p*-tolyl)-5,6,7,12-tetrahydroindolo[2,3-**

***b*]carbazol-12-yl)phenol (3y):** The reaction was performed at 0.086 mmol scale of **1a** and the

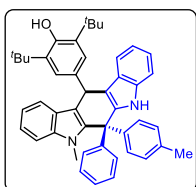

product was obtained as an inseparable mixture of diastereomers in the ratio of 1:1; pale yellow gummy liquid (35.5 mg, 64% yield);  $R_f$  = 0.2 (10% EtOAc in hexane);  $^1\text{H}$  NMR (400 MHz,  $\text{CDCl}_3$ )  $\delta$  7.65 – 7.54 (m, 3H), 7.49 – 7.44

(m, 2H), 7.40 – 7.29 (m, 3H), 7.27 – 7.15 (m, 8H), 7.11 – 7.07 (m, 2H), 7.07 – 6.97 (m, 2H), 5.69 (s, 1H), 4.93 (s, 1H), 3.28 – 3.26 (m, 3H), 2.38 – 2.34 (m, 3H), 1.31 – 1.30 (m, 18H);  $^{13}\text{C}$   $\{^1\text{H}\}$  NMR (100 MHz,  $\text{CDCl}_3$ )  $\delta$  152.0, 143.3, 142.6, 140.1, 139.4, 139.0, 138.8, 138.4, 138.3, 137.32, 137.31, 137.3, 137.2, 136.9, 136.85, 135.4, 135.3, 129.8, 129.7, 129.5, 129.3, 129.2, 129.17, 128.8, 128.5, 127.13, 127.12, 126.65, 126.63, 126.2, 125.3, 121.7, 121.4, 120.2, 120.1, 120.0, 119.3, 119.0, 115.5, 115.4, 114.53, 114.51, 114.4, 110.8, 108.8, 52.29, 52.27, 39.6, 34.34, 34.32, 32.22, 32.2, 30.54, 30.5, 21.1, 21.07; FT-IR (thin film, neat): 3634, 3432, 2954, 1594, 735  $\text{cm}^{-1}$ ; HRMS (ESI):  $m/z$  calcd for  $\text{C}_{46}\text{H}_{47}\text{N}_2\text{O}$   $[\text{M}+\text{H}]^+$  : 643.3688; found : 643.3716.

**7. General procedure for the synthesis of tetrahydrothieno[2,3-*b*]carbazole derivatives (5a-k):** To a solution of *para*-quinone methide [**4a**] (30 mg, 1.0 equiv.) and 2-indolylmethanols [**2a-f** & **2j-n**] (1.0 equiv.) in toluene (1.5 mL), TsOH (1.0 equiv.) was added. The resulting reaction mixture was stirred at room temperature for 7 hours. After the reaction was complete (based on TLC analysis), the reaction mixture was concentrated under reduced pressure, and then the residue was purified through a silica gel column using EtOAc/Hexane mixture as an eluent to get the pure product [**5a-k**].

### 8. Characterization of products 5a to 5k

#### 2,6-di-*tert*-butyl-4-(10,10-diphenyl-9,10-dihydro-4H-thieno[2,3-*b*]carbazol-4-yl)phenol

**(5a):** The reaction was performed at 0.10 mmol scale of **4a**; white solid (53.0 mg, 91% yield);

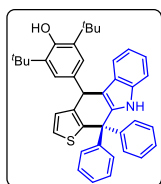

m. p. = 178–180 °C;  $R_f$  = 0.6 (10% EtOAc in hexane);  $^1\text{H}$  NMR (400 MHz, DMSO- $d_6$ )  $\delta$  10.66 (s, 1H), 7.35 – 7.33 (m, 2H), 7.30 (d,  $J$  = 5.2 Hz, 1H), 7.27 – 7.21 (m, 5H), 7.19 – 7.15 (m, 2H), 7.11 – 7.09 (m, 3H), 6.96 (s, 2H), 6.94 – 6.90

(m, 1H), 6.78 – 6.75 (m, 1H), 6.70 (d,  $J$  = 5.2 Hz, 1H), 6.67 (s, 1H), 5.37 (s, 1H), 1.21 (s, 18H);  $^{13}\text{C}$  { $^1\text{H}$ } NMR (100 MHz, DMSO- $d_6$ )  $\delta$  152.1, 147.2, 146.7, 142.0, 139.8, 139.0, 137.4, 136.6, 135.7, 128.8, 128.7, 128.1, 128.0, 126.8, 126.7, 126.6, 126.1, 125.3, 124.5, 121.2, 119.1, 118.3, 112.0, 111.4, 53.6, 41.32, 41.31, 34.5, 30.5; FT-IR (thin film, neat): 3631, 3226, 2940, 1490, 735  $\text{cm}^{-1}$ ; HRMS (ESI):  $m/z$  calcd for  $\text{C}_{40}\text{H}_{40}\text{NOS}$  [ $\text{M}+\text{H}$ ] $^+$  : 582.2831; found : 582.2828.

#### 4-(10,10-bis(4-chlorophenyl)-9,10-dihydro-4H-thieno[2,3-*b*]carbazol-4-yl)-2,6-di-*tert*-

**butylphenol (5b):** The reaction was performed at 0.10 mmol scale of **4a**; white solid (55.3 mg,

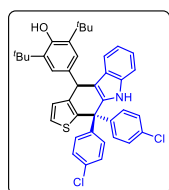

85% yield); m. p. = 246–248 °C;  $R_f$  = 0.6 (10% EtOAc in hexane);  $^1\text{H}$  NMR (400 MHz, DMSO- $d_6$ )  $\delta$  10.76 (s, 1H), 7.38 – 7.35 (m, 5H), 7.32 – 7.29 (m, 2H), 7.23 – 7.21 (m, 1H), 7.14 – 7.06 (m, 3H), 6.98 – 6.94 (m, 1H), 6.89 – 6.88 (m,

2H), 6.82 – 6.79 (m, 1H), 6.76 (d,  $J$  = 5.2 Hz, 1H), 6.684 – 6.68 (m, 1H), 5.40 – 5.39 (m, 1H), 1.19 – 1.18 (s, 18H);  $^{13}\text{C}$  { $^1\text{H}$ } NMR (100 MHz, DMSO- $d_6$ )  $\delta$  152.1, 145.6, 145.0, 141.0, 140.4,

139.0, 137.4, 135.9, 135.3, 131.73, 131.7, 130.44, 130.42, 128.2, 128.1, 127.1, 126.5, 125.2, 124.3, 121.5, 119.2, 118.5, 112.5, 111.4, 52.7, 41.2, 34.5, 30.4; FT-IR (thin film, neat): 3633, 3443, 2923, 1487, 742  $\text{cm}^{-1}$ ; HRMS (APCI):  $m/z$  calcd for  $\text{C}_{40}\text{H}_{38}\text{Cl}_2\text{NOS}$   $[\text{M}+\text{H}]^+$  : 650.2051; found : 650.2074.

#### 4-(10,10-bis(4-fluorophenyl)-9,10-dihydro-4H-thieno[2,3-b]carbazol-4-yl)-2,6-di-tert-

**butylphenol (5c):** The reaction was performed at 0.10 mmol scale of **4a**; white solid (53.1 mg,

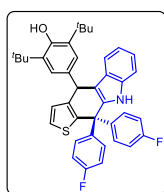

86% yield); gummy solid;  $R_f$  = 0.6 (10% EtOAc in hexane);  $^1\text{H}$  NMR (400 MHz,  $\text{DMSO-d}_6$ )  $\delta$  10.74 (s, 1H), 7.38 – 7.31 (m, 3H), 7.21 (d,  $J$  = 8.0 Hz, 1H), 7.15 – 7.08 (m, 7H), 6.95 (t,  $J$  = 7.4 Hz, 1H), 6.90 – 6.87 (m, 2H), 6.81 – 6.78

(m, 1H), 6.76 – 6.72 (m, 1H), 6.68 – 6.65 (m, 1H), 5.38 (s, 1H), 1.19 (s, 18H);  $^{13}\text{C}$   $\{^1\text{H}\}$  NMR (100 MHz,  $\text{DMSO-d}_6$ )  $\delta$  161.0 (d,  $J_{\text{C-F}}$  = 242.8 Hz), 160.9 (d,  $J_{\text{C-F}}$  = 242.4 Hz), 152.1, 143.2 (d,  $J_{\text{C-F}}$  = 3.2 Hz), 142.6 (d,  $J_{\text{C-F}}$  = 2.9 Hz), 141.8, 140.1, 139.0, 137.4, 136.5, 135.4, 130.6, 130.5, 127.0, 126.4, 125.2, 124.3, 121.4, 119.2, 118.5, 114.92 (d,  $J_{\text{C-F}}$  = 21.2 Hz), 114.87 (d,  $J_{\text{C-F}}$  = 21.1 Hz), 112.2, 111.4, 52.5, 41.2, 34.5, 30.4;  $^{19}\text{F}\{^1\text{H}\}$  NMR (376 MHz,  $\text{CDCl}_3$ )  $\delta$  – 116.03, –116.16; FT-IR (thin film, neat): 3643, 3463, 2922, 1504, 740  $\text{cm}^{-1}$ ; HRMS (ESI):  $m/z$  calcd for  $\text{C}_{40}\text{H}_{36}\text{F}_2\text{NOS}$   $[\text{M}-\text{H}]^-$  : 616.2486; found : 616.2504.

#### 2,6-di-tert-butyl-4-(10,10-di-*p*-tolyl-9,10-dihydro-4H-thieno[2,3-*b*]carbazol-4-yl)phenol

**(5d):** The reaction was performed at 0.10 mmol scale of **4a**; white solid (48.8 mg, 80% yield);

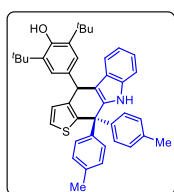

m. p. = 195–197  $^\circ\text{C}$ ;  $R_f$  = 0.6 (10% EtOAc in hexane);  $^1\text{H}$  NMR (400 MHz,  $\text{DMSO-d}_6$ )  $\delta$  10.58 (s, 1H), 7.29 (d,  $J$  = 5.2 Hz, 1H), 7.22 – 7.18 (m, 3H), 7.10 – 7.05 (m, 5H), 6.99 – 6.97 (m, 2H), 6.95 – 6.90 (m, 3H), 6.78 – 6.75 (m, 1H),

6.69 (d,  $J$  = 5.2 Hz, 1H), 6.66 (s, 1H), 5.35 (s, 1H), 2.22 (s, 3H), 2.21 (s, 3H), 1.21 (s, 18H);  $^{13}\text{C}$   $\{^1\text{H}\}$  NMR (100 MHz,  $\text{DMSO-d}_6$ )  $\delta$  152.0, 144.4, 143.9, 142.5, 139.6, 138.9, 137.3, 137.1, 135.73, 135.7, 135.66, 128.7, 128.6, 128.56, 128.5, 126.8, 125.8, 125.3, 124.4, 121.1, 119.0, 118.2, 111.7, 111.3, 52.9, 41.31, 41.3, 34.5, 30.5, 20.6, 20.5; FT-IR (thin film, neat): 3644,

3462, 2923, 1457, 738  $\text{cm}^{-1}$ ; HRMS (APCI):  $m/z$  calcd for  $\text{C}_{42}\text{H}_{44}\text{NOS}$   $[\text{M}+\text{H}]^+$  : 610.3144; found : 610.3147.

**2,6-di-*tert*-butyl-4-(10,10-di-*m*-tolyl-9,10-dihydro-4H-thieno[2,3-*b*]carbazol-4-yl)phenol**

**(5e):** The reaction was performed at 0.10 mmol scale of **4a**; white solid (47.0 mg, 77% yield);

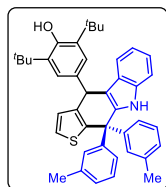

m. p. = 205–207 °C;  $R_f$  = 0.6 (10% EtOAc in hexane);  $^1\text{H}$  NMR (400 MHz,

$\text{DMSO-d}_6$ )  $\delta$  10.62 (s, 1H), 7.28 (d,  $J$  = 5.2 Hz, 1H), 7.19 (d,  $J$  = 8.0 Hz, 1H),

7.15 – 7.10 (m, 4H), 7.09 – 6.98 (m, 3H), 6.96 (m, 2H), 6.93 – 6.89 (m, 3H),

6.75 (t,  $J$  = 7.3 Hz, 1H), 6.67 – 6.66 (m, 2H), 5.34 (s, 1H), 2.17 (s, 3H), 2.14 (s, 3H), 1.21 (s,

18H);  $^{13}\text{C}$   $\{^1\text{H}\}$  NMR (100 MHz,  $\text{DMSO-d}_6$ )  $\delta$  152.0, 147.4, 146.8, 142.1, 139.7, 139.0 (2C),

137.4, 137.0, 136.9, 136.7, 135.8, 129.33, 129.3, 129.2, 127.9, 127.3, 126.8, 126.1, 125.9,

125.3, 124.5, 121.1, 119.15, 119.1, 118.3, 111.8, 111.4, 53.5, 41.34, 41.33, 34.5, 30.5, 21.45,

21.43, 21.36, 21.34; FT-IR (thin film, neat): 3643, 3459, 2923, 1484, 738  $\text{cm}^{-1}$ ; HRMS (ESI):

$m/z$  calcd for  $\text{C}_{42}\text{H}_{44}\text{NOS}$   $[\text{M}+\text{H}]^+$  : 610.3144; found : 610.3138.

**4-(10,10-bis(3,5-dimethylphenyl)-9,10-dihydro-4H-thieno[2,3-*b*]carbazol-4-yl)-2,6-di-**

***tert*-butylphenol (5f):** The reaction was performed at 0.10 mmol scale of **4a**; white solid (45.9

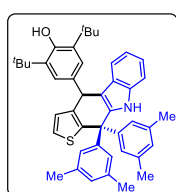

mg, 72% yield); gummy solid;  $R_f$  = 0.6 (10% EtOAc in hexane);  $^1\text{H}$  NMR (400

MHz,  $\text{DMSO-d}_6$ )  $\delta$  10.57 (s, 1H), 7.31 (d,  $J$  = 5.2 Hz, 1H), 7.20 (d,  $J$  = 8.0 Hz,

1H), 7.01 (d,  $J$  = 8.0 Hz, 1H), 6.97 (s, 2H), 6.94 – 6.91 (m, 3H), 6.86 (s, 1H),

6.80 (s, 1H), 6.77 – 6.74 (m, 1H), 6.69 – 6.68 (m, 3H), 6.66 (d,  $J$  = 5.2 Hz, 1H), 5.32 (s, 1H),

2.15 (s, 6H), 2.12 (s, 6H), 1.21 (s, 18H);  $^{13}\text{C}$   $\{^1\text{H}\}$  NMR (100 MHz,  $\text{DMSO-d}_6$ )  $\delta$  152.0, 147.6,

147.0, 142.1, 139.6, 139.0, 137.3, 136.8, 136.71, 136.69, 135.8, 128.1, 128.0, 126.7, 126.51,

126.46, 125.8, 125.3, 124.5, 121.1, 119.1, 118.2, 111.6, 111.4, 53.3, 41.3, 34.5, 30.5, 21.34,

21.32, 21.25, 21.23; FT-IR (thin film, neat): 3646, 3433, 2922, 1458, 740  $\text{cm}^{-1}$ ; HRMS (ESI):

$m/z$  calcd for  $\text{C}_{44}\text{H}_{48}\text{NOS}$   $[\text{M}+\text{H}]^+$  : 638.3457; found : 638.3468.

**2,6-di-tert-butyl-4-(7-fluoro-10,10-diphenyl-9,10-dihydro-4H-thieno[2,3-b]carbazol-4-**

**yl)phenol (5g):** The reaction was performed at 0.10 mmol scale of **4a**; white solid (49.2 mg,

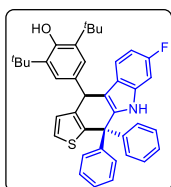

82% yield); m. p. = 115–117 °C;  $R_f$  = 0.6 (10% EtOAc in hexane);  $^1\text{H}$  NMR

(400 MHz, DMSO- $d_6$ )  $\delta$  10.81 (s, 1H), 7.37 (d,  $J$  = 5.2 Hz, 1H), 7.35 – 7.29 (m, 6H), 7.27 – 7.21 (m, 2H), 7.13 – 7.11 (m, 2H), 7.06 – 7.03 (m, 1H), 6.97 – 6.93 (m, 3H), 6.74 (d,  $J$  = 5.2 Hz, 1H), 6.72 – 6.66 (m, 2H), 5.39 (s, 1H), 1.23 (s, 18H);  $^{13}\text{C}$  { $^1\text{H}$ } NMR (100 MHz, DMSO- $d_6$ )  $\delta$  158.8 (d,  $J_{\text{C-F}}$  = 233.1 Hz), 152.1, 147.0, 146.5, 141.8, 139.7, 139.1, 137.4, 137.3 (d,  $J_{\text{C-F}}$  = 3.7 Hz), 135.4, 128.7, 128.6, 128.13, 128.1, 126.8, 126.7, 126.2, 124.4, 122.1, 120.0 (d,  $J_{\text{C-F}}$  = 10.1 Hz), 112.1, 106.7 (d,  $J_{\text{C-F}}$  = 24.3 Hz), 97.5, 97.3, 53.5, 41.1, 41.0, 34.5, 30.5;  $^{19}\text{F}$ { $^1\text{H}$ } NMR (376 MHz,  $\text{CDCl}_3$ )  $\delta$  –121.4; FT-IR (thin film, neat): 3643, 3463, 2922, 1460, 730  $\text{cm}^{-1}$ ; HRMS (ESI):  $m/z$  calcd for  $\text{C}_{40}\text{H}_{37}\text{FNOS}$  [ $\text{M-H}$ ] $^-$  : 598.2580; found : 598.2604.

**2,6-di-tert-butyl-4-(6-methoxy-10,10-diphenyl-9,10-dihydro-4H-thieno[2,3-b]carbazol-4-**

**yl)phenol (5h):** The reaction was performed at 0.10 mmol scale of **4a**; white solid (45.2 mg,

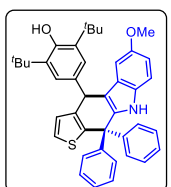

74% yield); gummy solid;  $R_f$  = 0.5 (10% EtOAc in hexane);  $^1\text{H}$  NMR (400 MHz,

DMSO- $d_6$ )  $\delta$  10.50 (s, 1H), 7.37 – 7.34 (m, 3H), 7.32 – 7.30 (m, 2H), 7.28 – 7.24 (m, 3H), 7.22 – 7.18 (m, 1H), 7.12 – 7.09 (m, 3H), 7.02 (s, 2H), 6.71 (s, 1H), 6.66 (d,  $J$  = 5.2 Hz, 1H), 6.62 – 6.60 (m, 2H), 5.33 (s, 1H), 3.57 (s, 3H), 1.25 (s, 18H);  $^{13}\text{C}$  { $^1\text{H}$ } NMR (100 MHz, DMSO- $d_6$ )  $\delta$  152.7, 152.0, 147.3, 146.8, 142.2, 139.9, 139.0, 136.9, 135.7, 132.4, 128.8, 128.6, 128.03, 128.0, 126.9, 126.6, 126.1, 125.6, 124.6, 112.1, 112.01, 112.0, 111.0, 101.2, 55.1, 55.0, 53.6, 41.5, 34.5, 30.5; FT-IR (thin film, neat): 3674, 3445, 2924, 1485, 737  $\text{cm}^{-1}$ ; HRMS (APCI):  $m/z$  calcd for  $\text{C}_{41}\text{H}_{42}\text{NO}_2\text{S}$  [ $\text{M+H}$ ] $^+$  : 612.2936; found : 612.2931.

**2,6-di-tert-butyl-4-(9-methyl-10,10-diphenyl-9,10-dihydro-4H-thieno[2,3-b]carbazol-4-**

**yl)phenol (5i):** The reaction was performed at 0.10 mmol scale of **4a**; white solid (41.1 mg,

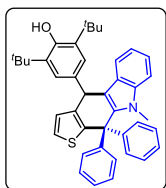

69% yield); m. p. = 253–255 °C;  $R_f$  = 0.6 (10% EtOAc in hexane);  $^1\text{H}$  NMR (400 MHz,  $\text{CDCl}_3$ )  $\delta$  7.59 – 7.57 (m, 2H), 7.41 – 7.38 (m, 3H), 7.36 – 7.32 (m, 2H), 7.30 – 7.26 (m, 3H), 7.24 – 7.15 (m, 3H), 7.09 (d,  $J$  = 5.2 Hz, 1H), 7.04 – 7.00 (m, 3H), 6.72 (d,  $J$  = 5.2 Hz, 1H), 5.47 (s, 1H), 4.97 (s, 1H), 3.15 (s, 3H), 1.30 (s, 18H);  $^{13}\text{C}$  { $^1\text{H}$ } NMR (100 MHz,  $\text{CDCl}_3$ )  $\delta$  152.2, 145.7, 145.3, 143.7, 138.8, 138.4, 137.9, 135.6, 135.2, 129.9, 129.8, 128.3, 128.1, 126.93, 126.9, 126.5, 125.8, 125.2, 125.0, 121.6, 120.2, 119.0, 113.9, 108.9, 54.2, 42.32, 42.3, 34.4, 32.1, 30.5; FT-IR (thin film, neat): 3635, 2923, 1469, 738  $\text{cm}^{-1}$ ; HRMS (ESI):  $m/z$  calcd for  $\text{C}_{41}\text{H}_{42}\text{NOS}$  [ $\text{M}+\text{H}$ ] $^+$  : 596.2987; found : 596.2976.

**4-(9-benzyl-10,10-diphenyl-9,10-dihydro-4H-thieno[2,3-*b*]carbazol-4-yl)-2,6-di-*tert*-**

**butylphenol (5j):** The reaction was performed at 0.10 mmol scale of **4a**; white solid (22.2 mg,

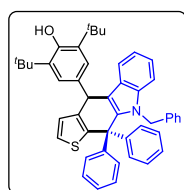

33% yield); m. p. = 215–217 °C;  $R_f$  = 0.5 (10% EtOAc in hexane);  $^1\text{H}$  NMR (400 MHz,  $\text{CDCl}_3$ )  $\delta$  7.54 (d,  $J$  = 7.2 Hz, 2H), 7.39 – 7.35 (m, 3H), 7.20 – 7.13 (m, 3H), 7.11 – 7.08 (m, 5H), 7.05 – 6.97 (m, 4H), 6.91 – 6.88 (m, 3H), 6.77 (d,  $J$  = 5.3 Hz, 1H), 6.25 (d,  $J$  = 7.4 Hz, 2H), 5.56 (s, 1H), 5.16 – 5.04 (m, 2H), 5.03 (s, 1H), 1.36 (s, 18H);  $^{13}\text{C}$  { $^1\text{H}$ } NMR (100 MHz,  $\text{CDCl}_3$ )  $\delta$  152.3, 145.8, 144.5, 143.7, 138.4, 138.2, 138.1, 137.1, 135.7, 135.3, 129.9, 129.7, 128.2, 128.1, 127.8, 126.8, 126.7, 126.3, 126.2, 126.1, 125.4, 125.3, 125.2, 122.0, 120.3, 119.4, 113.7, 110.4, 54.3, 49.1, 42.15, 42.13, 34.4, 30.5; FT-IR (thin film, neat): 3634, 2957, 1465, 732  $\text{cm}^{-1}$ ; HRMS (ESI):  $m/z$  calcd for  $\text{C}_{47}\text{H}_{46}\text{NOS}$  [ $\text{M}+\text{H}$ ] $^+$  : 672.3300; found : 672.3315.

**2,6-di-*tert*-butyl-4-(10-phenyl-10-(*p*-tolyl)-9,10-dihydro-4H-thieno[2,3-*b*]carbazol-4-**

**yl)phenol (5k):** The reaction was performed at 0.10 mmol scale of **4a** and the product was

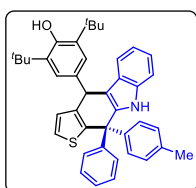

obtained as an inseparable mixture of diastereomers in the ratio of 1:1; pale yellow gummy liquid (50.0 mg, 84% yield);  $R_f$  = 0.6 (10% EtOAc in hexane);  $^1\text{H}$  NMR (400 MHz,  $\text{DMSO-}d_6$ )  $\delta$  10.62 (s, 1H), 7.33 – 7.31 (m, 2H), 7.27 – 7.17 (m, 5H), 7.10 – 7.05 (m, 4H), 6.98 – 6.90 (m, 4H), 6.78 – 6.75 (m, 1H), 6.70 – 6.68 (m,

1H), 6.67 (s, 1H), 5.36 – 5.35 (m, 1H), 2.22– 2.21 (m, 3H), 1.20 (s, 18H); <sup>13</sup>C {<sup>1</sup>H} NMR (100 MHz, DMSO-d<sub>6</sub>) δ 152.0, 147.3, 146.8, 144.4, 143.7, 142.28, 142.26, 139.77, 139.73, 139.0, 138.97, 137.4, 136.91, 136.9, 135.83, 135.8, 135.7, 128.8, 128.7, 128.63, 128.61, 128.6, 128.05, 128.0, 126.83, 126.81, 126.7, 126.6, 126.0, 125.3, 124.4, 121.1, 119.1, 118.3, 111.9, 111.3, 53.2, 41.3, 41.27, 34.5, 30.5, 20.6; FT-IR (thin film, neat): 3633, 3224, 2942, 1493, 737 cm<sup>-1</sup>; HRMS (ESI): *m/z* calcd for C<sub>41</sub>H<sub>42</sub>NOS [M+H]<sup>+</sup> : 596.2987; found : 596.2985.

**9. General procedure for the synthesis of tetrahydrothieno[3,2-*b*]carbazole derivatives (7a-k):** *Para*-quinone methide [6a-c] (30 mg, 1.0 equiv.) and 2-indolylmethanols [2a-e, 2i-k & 2n] (1.0 equiv.) were dissolved in acetonitrile (1.5 mL) and, then TsOH (1.0 equiv.) was added to it. The resulting reaction mixture was stirred at room temperature for an hour. The residue was then concentrated under reduced pressure, and the residue was then purified through a silica gel column using EtOAc/Hexane mixture as an eluent to get the pure products [7a-k].

## 10. Characterization of products 7a to 7k

### 2,6-di-*tert*-butyl-4-(4,4-diphenyl-5,10-dihydro-4H-thieno[3,2-*b*]carbazol-10-yl)phenol

(7a): The reaction was performed at 0.10 mmol scale of 6a; white solid (51.2 mg, 88% yield);

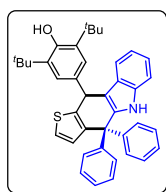

gummy solid; *R<sub>f</sub>* = 0.6 (10% EtOAc in hexane); <sup>1</sup>H NMR (400 MHz, DMSO-d<sub>6</sub>) δ 10.64 (s, 1H), 7.34 – 7.26 (m, 7H), 7.25 – 7.18 (m, 3H), 7.16 – 7.11 (m, 3H), 7.02 (s, 2H), 6.96 (t, *J* = 7.5 Hz, 1H), 6.81 (t, *J* = 7.5 Hz, 1H), 6.75 (s, 1H),

6.68 (d, *J* = 5.3 Hz, 1H), 5.61 (s, 1H), 1.24 (s, 18H); <sup>13</sup>C {<sup>1</sup>H} NMR (100 MHz, DMSO-d<sub>6</sub>) δ 152.3, 146.3, 146.0, 141.3, 139.3, 139.0 (2C), 137.4, 137.3, 136.4, 128.8 (2C), 128.1 (2C), 127.3, 126.4, 125.0, 124.9, 124.2, 121.1, 119.1, 118.3, 111.4, 111.3, 53.4, 40.9, 40.88, 34.5, 30.5; FT-IR (thin film, neat): 3637, 3457, 2923, 1488, 738 cm<sup>-1</sup>; HRMS (ESI): *m/z* calcd for C<sub>40</sub>H<sub>40</sub>NOS [M+H]<sup>+</sup> : 582.2831; found : 582.2820.



#### 4-(4,4-bis(4-chlorophenyl)-5,10-dihydro-4H-thieno[3,2-*b*]carbazol-10-yl)-2,6-di-*tert*-

**butylphenol (7b):** The reaction was performed at 0.10 mmol scale of **6a**; white solid (47.5 mg,

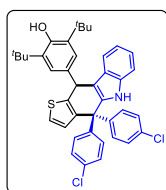

73% yield); m. p. = 236–238 °C;  $R_f$  = 0.6 (10% EtOAc in hexane);  $^1\text{H}$  NMR (400 MHz, DMSO- $d_6$ )  $\delta$  10.72 (s, 1H), 7.39 – 7.36 (m, 5H), 7.31 – 7.28 (m, 2H), 7.24 (d,  $J$  = 8.1 Hz, 1H), 7.18 (d,  $J$  = 7.9 Hz, 1H), 7.08 (d,  $J$  = 8.6 Hz, 2H), 7.01 – 6.97 (m, 1H), 6.94 (s, 2H), 6.84 (t,  $J$  = 7.4 Hz, 1H), 6.75 (s, 1H), 6.69 (d,  $J$  = 5.3 Hz, 1H), 5.62 (s, 1H), 1.22 (s, 18H);  $^{13}\text{C}$  { $^1\text{H}$ } NMR (100 MHz, DMSO- $d_6$ )  $\delta$  152.3, 144.9, 144.4, 141.9, 139.0, 138.6, 137.4, 136.6, 136.1, 131.5, 131.4, 130.6, 130.5, 128.2, 128.1, 126.9, 125.3, 125.0, 124.1, 121.4, 119.1, 118.5, 111.8, 111.4, 52.6, 40.75, 40.73, 34.5, 30.4; FT-IR (thin film, neat): 3638, 3457, 2923, 1489, 739  $\text{cm}^{-1}$ ; HRMS (ESI):  $m/z$  calcd for  $\text{C}_{40}\text{H}_{36}\text{Cl}_2\text{NOS}$  [ $\text{M}-\text{H}$ ] $^-$  : 648.1895; found : 648.1915.

#### 4-(4,4-bis(4-fluorophenyl)-5,10-dihydro-4H-thieno[3,2-*b*]carbazol-10-yl)-2,6-di-*tert*-

**butylphenol (7c):** The reaction was performed at 0.10 mmol scale of **6a**; white solid (47.0 mg,

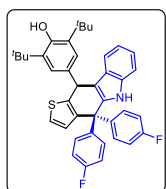

73% yield); gummy solid;  $R_f$  = 0.6 (10% EtOAc in hexane);  $^1\text{H}$  NMR (400 MHz, DMSO- $d_6$ )  $\delta$  10.70 (s, 1H), 7.34 – 7.30 (m, 3H), 7.24 (d,  $J$  = 8.1 Hz, 1H), 7.17 – 7.14 (m, 2H), 7.13 – 7.07 (m, 5H), 6.98 (d,  $J$  = 7.4 Hz, 1H), 6.96 (s, 2H), 6.83 (t,  $J$  = 7.5 Hz, 1H), 6.75 (s, 1H), 6.68 (d,  $J$  = 5.3 Hz, 1H), 5.60 (s, 1H), 1.22 (s, 18H);  $^{13}\text{C}$  { $^1\text{H}$ } NMR (100 MHz, DMSO- $d_6$ )  $\delta$  160.8 (d,  $J_{\text{C-F}}$  = 242.2 Hz), 152.3, 142.4 (d,  $J_{\text{C-F}}$  = 3.0 Hz), 142.0 (d,  $J_{\text{C-F}}$  = 3.0 Hz), 141.6, 139.2, 139.0, 137.4, 137.2, 136.2, 130.73, 130.7, 130.6, 127.0, 125.2, 125.0, 124.1, 121.3, 119.1, 118.5, 114.9 (d,  $J_{\text{C-F}}$  = 21.0 Hz), 114.8 (d,  $J_{\text{C-F}}$  = 21.2 Hz), 111.5, 114.4, 52.3, 40.8, 40.78, 34.5, 30.4;  $^{19}\text{F}$  { $^1\text{H}$ } NMR (376 MHz,  $\text{CDCl}_3$ )  $\delta$  -116.44, -116.48; FT-IR (thin film, neat): 3649, 3458, 2921, 1459, 741  $\text{cm}^{-1}$ ; HRMS (ESI):  $m/z$  calcd for  $\text{C}_{40}\text{H}_{38}\text{F}_2\text{NOS}$  [ $\text{M}+\text{H}$ ] $^+$  : 618.2642; found : 618.2635.

#### 2,6-di-*tert*-butyl-4-(4,4-di-*p*-tolyl-5,10-dihydro-4H-thieno[3,2-*b*]carbazol-10-yl)phenol

**(7d):** The reaction was performed at 0.10 mmol scale of **6a**; white solid (43.9 mg, 72% yield);

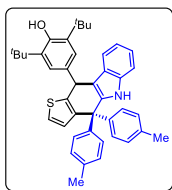

m. p. = 197–199 °C;  $R_f$  = 0.6 (10% EtOAc in hexane);  $^1\text{H}$  NMR (400 MHz, DMSO- $d_6$ )  $\delta$  10.56 (s, 1H), 7.27 (d,  $J$  = 5.3 Hz, 1H), 7.23 – 7.20 (m, 2H), 7.18 (s, 1H), 7.13 (d,  $J$  = 7.9 Hz, 1H), 7.07 (d,  $J$  = 7.9 Hz, 4H), 7.00 – 6.93 (m, 5H), 6.80 (t,  $J$  = 7.5 Hz, 1H), 6.73 (s, 1H), 6.64 (d,  $J$  = 5.3 Hz, 1H), 5.57 (s, 1H), 2.24 (s, 3H), 2.23 (s, 3H), 1.23 (s, 18H);  $^{13}\text{C}$   $\{^1\text{H}\}$  NMR (100 MHz, DMSO- $d_6$ )  $\delta$  152.2, 143.5, 143.2, 141.1, 139.8, 139.0, 137.9, 137.3, 136.4, 135.5, 135.4, 128.75, 128.7, 128.6, 127.3, 125.1, 124.6, 124.2, 121.0, 119.0, 118.2, 111.3 (2C), 111.1, 52.7, 40.9, 40.88, 34.5, 30.4, 20.52, 20.51; FT-IR (thin film, neat): 3640, 3457, 2922, 1457, 738  $\text{cm}^{-1}$ ; HRMS (APCI):  $m/z$  calcd for  $\text{C}_{42}\text{H}_{44}\text{NOS}$   $[\text{M}+\text{H}]^+$  : 610.3144; found : 610.3157.

#### 2,6-di-tert-butyl-4-(4,4-di-*m*-tolyl-5,10-dihydro-4H-thieno[3,2-*b*]carbazol-10-yl)phenol

(7e): The reaction was performed at 0.10 mmol scale of **6a**; white solid (53.0 mg, 87% yield);

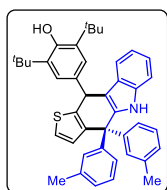

m. p. = 205–207 °C;  $R_f$  = 0.6 (10% EtOAc in hexane);  $^1\text{H}$  NMR (400 MHz, DMSO- $d_6$ )  $\delta$  10.61 (s, 1H), 7.28 (d,  $J$  = 5.3 Hz, 1H), 7.23 (d,  $J$  = 8.1 Hz, 1H), 7.19 – 7.13 (m, 3H), 7.12 – 7.10 (m, 2H), 7.05 – 7.03 (m, 3H), 7.01 (d,  $J$  = 7.6 Hz, 1H), 6.95 (t,  $J$  = 7.4 Hz, 1H), 6.92 – 6.90 (m, 2H), 6.80 (t,  $J$  = 7.5 Hz, 1H), 6.75 (s, 1H), 6.69 (d,  $J$  = 5.3 Hz, 1H), 5.58 (s, 1H), 2.21 (s, 3H), 2.18 (s, 3H), 1.25 (s, 18H);  $^{13}\text{C}$   $\{^1\text{H}\}$  NMR (100 MHz, DMSO- $d_6$ )  $\delta$  152.3, 146.5, 146.1, 141.3, 139.3, 139.0, 137.5, 137.3, 136.9 (2C), 136.4, 129.4, 129.3, 127.9, 127.4, 127.12, 127.1, 126.13, 126.1, 125.0, 124.7, 124.6, 124.2, 121.1, 119.1, 118.2, 111.4, 111.1, 53.3, 40.95, 40.93, 34.5, 30.5, 21.41, 21.4, 21.33, 21.31; FT-IR (thin film, neat): 3638, 3458, 2922, 1457, 739  $\text{cm}^{-1}$ ; HRMS (APCI):  $m/z$  calcd for  $\text{C}_{42}\text{H}_{44}\text{NOS}$   $[\text{M}+\text{H}]^+$  : 610.3144; found : 610.3148.

#### 4-(4,4-bis(3-methoxyphenyl)-5,10-dihydro-4H-thieno[3,2-*b*]carbazol-10-yl)-2,6-di-tert-

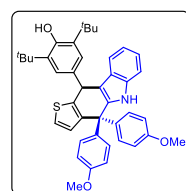

**butylphenol (7f):** The reaction was performed at 0.10 mmol scale of **6a**; white solid (44.3 mg, 69% yield); gummy solid;  $R_f$  = 0.4 (10% EtOAc in hexane);  $^1\text{H}$  NMR (400 MHz, DMSO- $d_6$ )  $\delta$  10.58 (s, 1H), 7.29 (d,  $J$  = 5.3 Hz, 1H), 7.23

– 7.20 (m, 3H), 7.14 (d,  $J = 8.0$  Hz, 1H), 7.02 – 6.99 (m, 4H), 6.95 (t,  $J = 7.7$  Hz, 1H), 6.85 – 6.82 (m, 4H), 6.80 (d,  $J = 7.2$  Hz, 1H), 6.73 (s, 1H), 6.64 (d,  $J = 5.3$  Hz, 1H), 5.56 (s, 1H), 3.694 (s, 3H), 3.691 (s, 3H), 1.23 (s, 18H);  $^{13}\text{C}$   $\{^1\text{H}\}$  NMR (100 MHz, DMSO- $d_6$ )  $\delta$  157.7, 157.6, 152.2, 140.8, 140.2, 139.0, 138.6, 138.3, 138.2, 137.3, 136.4, 129.9, 129.8, 127.3, 125.1, 124.65, 124.6, 124.2, 121.0, 119.0, 118.2, 113.4, 111.3, 110.9, 55.1, 55.07, 52.0, 40.89, 40.87, 34.5, 30.4; FT-IR (thin film, neat): 3626, 3455, 2922, 1458, 738  $\text{cm}^{-1}$ ; HRMS (ESI):  $m/z$  calcd for  $\text{C}_{42}\text{H}_{44}\text{NO}_3\text{S}$   $[\text{M}+\text{H}]^+$  : 642.3042; found : 642.3058.

**2,6-di-*tert*-butyl-4-(7-fluoro-4,4-diphenyl-5,10-dihydro-4H-thieno[3,2-*b*]carbazol-10-**

**yl)phenol (7g):** The reaction was performed at 0.10 mmol scale of **6a**; white solid (39.0 mg,

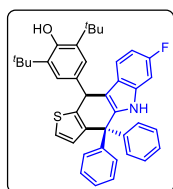

65% yield); gummy solid;  $R_f = 0.6$  (10% EtOAc in hexane);  $^1\text{H}$  NMR (400 MHz, DMSO- $d_6$ )  $\delta$  10.76 (s, 1H), 7.30 – 7.29 (m, 6H), 7.26 (s, 1H), 7.25 – 7.19 (m, 2H), 7.11 (d,  $J = 7.6$  Hz, 2H), 7.09 – 7.05 (m, 1H), 7.00 (s, 2H), 6.98 – 6.95

(m, 1H), 6.76 (s, 1H), 6.72 – 6.66 (m, 2H), 5.60 (s, 1H), 1.24 (s, 18H);  $^{13}\text{C}\{^1\text{H}\}$  NMR (100 MHz, DMSO- $d_6$ )  $\delta$  158.7 (d,  $J_{\text{C-F}} = 232.8$  Hz), 152.3, 146.1, 145.8, 141.2, 139.12, 139.1, 138.1 (d,  $J_{\text{C-F}} = 3.4$  Hz), 137.3 (d,  $J_{\text{C-F}} = 12.7$  Hz), 136.1, 128.8, 128.77, 128.1, 127.2, 126.5, 124.9, 124.2, 121.9, 119.9, 111.4, 106.7 (d,  $J_{\text{C-F}} = 24.4$  Hz), 106.7 (d,  $J_{\text{C-F}} = 24.5$  Hz), 97.6 (d,  $J_{\text{C-F}} = 1.6$  Hz), 97.3 (d,  $J_{\text{C-F}} = 1.5$  Hz), 53.4, 40.7, 40.68, 34.5, 30.5;  $^{19}\text{F}\{^1\text{H}\}$  NMR (376 MHz,  $\text{CDCl}_3$ )  $\delta$  –121.47; FT-IR (thin film, neat): 3615, 3458, 2923, 1488, 736  $\text{cm}^{-1}$ ; HRMS (APCI):  $m/z$  calcd for  $\text{C}_{40}\text{H}_{39}\text{FNOS}$   $[\text{M}+\text{H}]^+$  : 600.2736; found : 600.2725.

**2,6-di-*tert*-butyl-4-(8-methoxy-4,4-diphenyl-5,10-dihydro-4H-thieno[3,2-*b*]carbazol-10-**

**yl)phenol (7h):** The reaction was performed at 0.10 mmol scale of **6a**; white solid (42.8 mg,

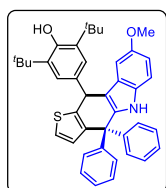

70% yield); m. p. = 246–248  $^{\circ}\text{C}$ ;  $R_f = 0.5$  (10% EtOAc in hexane);  $^1\text{H}$  NMR (400 MHz,  $\text{CDCl}_3$ )  $\delta$  10.46 (s, 1H), 7.35 – 7.30 (m, 5H), 7.28 – 7.24 (m, 3H), 7.23 – 7.19 (m, 1H), 7.12 – 7.10 (m, 3H), 7.05 (s, 2H), 6.76 (s, 1H), 6.69 (d,  $J = 5.3$  Hz,

1H), 6.65 – 6.64 (m, 1H), 6.63 – 6.60 (m, 1H), 5.54 (s, 1H), 3.59 (s, 3H), 1.26 (s, 18H);  $^{13}\text{C}$

{<sup>1</sup>H} NMR (100 MHz, CDCl<sub>3</sub>) δ 152.7, 152.3, 146.4, 146.1, 141.3, 139.6, 139.0, 137.7, 136.4, 132.4, 128.82, 128.8, 128.06, 128.04, 127.2, 126.43, 126.4, 125.3, 124.9, 124.4, 112.0, 111.5, 110.9, 101.1, 55.12, 55.1, 53.5, 41.08, 41.04, 34.5, 30.5; FT-IR (thin film, neat): 3627, 3456, 2922, 1483, 736 cm<sup>-1</sup>; HRMS (APCI): *m/z* calcd for C<sub>41</sub>H<sub>42</sub>NO<sub>2</sub>S [M+H]<sup>+</sup> : 612.2936; found : 612.2917.

**2,6-di-*tert*-butyl-4-(2-methyl-4,4-diphenyl-5,10-dihydro-4H-thieno[3,2-*b*]carbazol-10-**

**yl)phenol (7i):** The reaction was performed at 0.095 mmol scale of **6b**; white solid (47.1 mg,

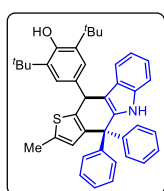

83% yield); m. p. = 273–275 °C; *R<sub>f</sub>* = 0.6 (10% EtOAc in hexane); <sup>1</sup>H NMR

(400 MHz, CDCl<sub>3</sub>) δ 7.64 (s, 1H), 7.40 – 7.38 (m, 2H), 7.34 – 7.26 (m, 8H),

7.24 – 7.21 (m, 2H), 7.10 (t, *J* = 7.2 Hz, 1H), 7.07 (s, 2H), 6.98 (t, *J* = 7.4 Hz,

1H), 6.47 (s, 1H), 5.53 (s, 1H), 5.05 (s, 1H), 2.35 (s, 3H), 1.36 (s, 18H); <sup>13</sup>C {<sup>1</sup>H} NMR (100

MHz, CDCl<sub>3</sub>) δ 152.5, 146.2, 146.1, 140.2, 138.6, 138.4, 137.5, 137.0, 135.6, 135.5, 129.12,

129.1, 128.43, 128.4, 126.8, 126.7, 126.3, 124.9, 124.8, 121.8, 120.1, 119.3, 113.2, 110.9, 53.8,

41.87, 41.85, 34.4, 30.5, 15.91, 15.9; FT-IR (thin film, neat): 3620, 3450, 2956, 1434, 732 cm<sup>-1</sup>;

HRMS (ESI): *m/z* calcd for C<sub>41</sub>H<sub>42</sub>NOS [M+H]<sup>+</sup> : 596.2987; found : 596.2992.

**2,6-di-*tert*-butyl-4-(12,12-diphenyl-11,12-dihydro-6H-benzo[4,5]thieno[3,2-*b*]carbazol-6-**

**yl)phenol (7j):** The reaction was performed at 0.086 mmol scale of **6c**; white solid (33.0 mg,

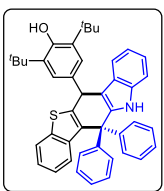

61% yield); gummy solid; *R<sub>f</sub>* = 0.5 (10% EtOAc in hexane); <sup>1</sup>H NMR (400 MHz,

CDCl<sub>3</sub>) δ 7.71 – 7.69 (m, 1H), 7.61 (s, 1H), 7.53 – 7.50 (m, 2H), 7.33 – 7.29 (m,

4H), 7.28 – 7.22 (m, 6H), 7.18 – 7.09 (m, 3H), 7.07 – 7.04 (m, 3H), 7.02 – 6.97

(m, 1H), 5.67 (s, 1H), 5.05 (s, 1H), 1.30 (s, 18H); <sup>13</sup>C {<sup>1</sup>H} NMR (100 MHz, CDCl<sub>3</sub>) δ 152.8,

145.9, 143.8, 143.5, 140.3, 139.6, 138.0, 137.0, 135.9, 134.4, 132.6, 129.5, 129.4 (2C), 128.6,

128.5, 127.1, 126.2, 125.2, 124.9, 123.4, 123.3, 122.5, 121.9, 120.0, 119.6, 112.4, 111.1, 54.1,

43.2, 43.1, 34.4, 30.4; FT-IR (thin film, neat): 3632, 3456, 2922, 1457, 739 cm<sup>-1</sup>; HRMS

(APCI): *m/z* calcd for C<sub>44</sub>H<sub>42</sub>NOS [M+H]<sup>+</sup> : 632.2987; found : 632.2999.

## 2,6-di-*tert*-butyl-4-(4-phenyl-4-(*p*-tolyl)-5,10-dihydro-4H-thieno[3,2-*b*]carbazol-10-

yl)phenol (**7k**): The reaction was performed at 0.10 mmol scale of **6a** and the product was

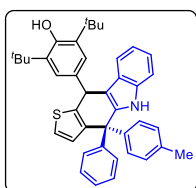

obtained as an inseparable mixture of diastereomers in the ratio of 1:1; pale yellow gummy solid (44.6 mg, 75% yield);  $R_f = 0.6$  (10% EtOAc in hexane);

$^1\text{H NMR}$  (400 MHz,  $\text{DMSO-d}_6$ )  $\delta$  10.57 (s, 1H), 7.29 – 7.22 (m, 4H), 7.20 – 7.15 (m, 3H), 7.12 – 7.04 (m, 4H), 6.97 – 6.90 (m, 4H), 6.79 – 6.75 (m, 1H), 6.72 (s, 1H), 6.64 – 6.61 (m, 1H), 5.56 – 5.55 (m, 1H), 2.21 – 2.20 (m, 3H), 1.20 (s, 18H);  $^{13}\text{C}$   $\{^1\text{H}\}$  NMR (100 MHz,  $\text{DMSO-d}_6$ )  $\delta$  152.3, 146.4, 146.1, 143.4, 143.1, 141.2, 141.19, 139.6, 139.03, 139.02, 137.7, 137.6, 137.3, 136.4, 135.6, 135.5, 128.8, 128.77, 128.65, 128.1, 127.3, 126.4, 125.1, 124.8, 124.3, 121.12, 121.10, 119.1, 118.3, 111.4, 111.21, 111.2, 53.1, 40.90, 40.89, 34.5, 30.5, 20.6, 20.5; FT-IR (thin film, neat): 3635, 3454, 2920, 1484, 735  $\text{cm}^{-1}$ ; HRMS (ESI):  $m/z$  calcd for  $\text{C}_{41}\text{H}_{42}\text{NOS}$   $[\text{M}+\text{H}]^+$  : 596.2987; found : 596.2994.

## 11. References:

1. T. Z. Li, S. J. Liu, Y. W. Sun, S. Deng, W. Tan, Y. Jiao, Y. C. Zhang and F. Shi, *Angew. Chemie - Int. Ed.* 2021, **60**, 2355–2363.
2. Z. Yuan, W. Wei, A. Lin and H. Yao, *Org. Lett.* 2016, **18**, 3370–3373.

### <sup>1</sup>H NMR (400 MHz, CDCl<sub>3</sub>) Spectrum of **3a**

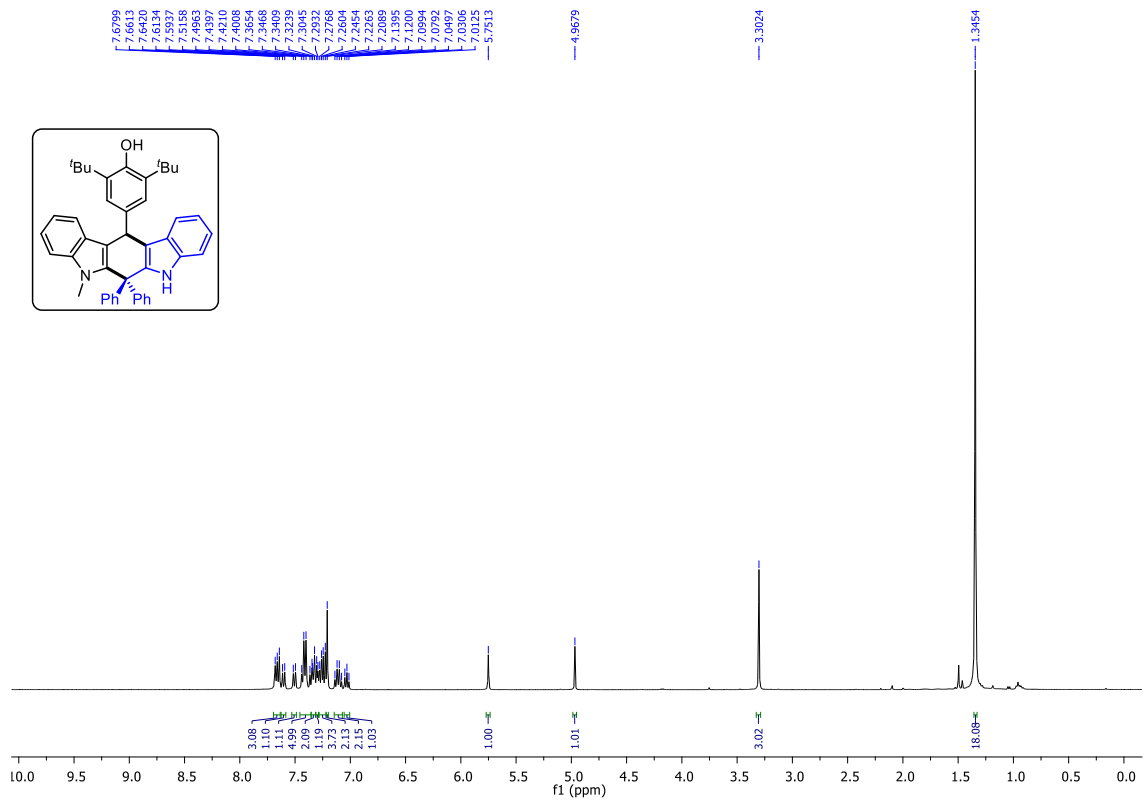

### <sup>13</sup>C {<sup>1</sup>H} NMR (100 MHz, CDCl<sub>3</sub>) Spectrum of **3a**

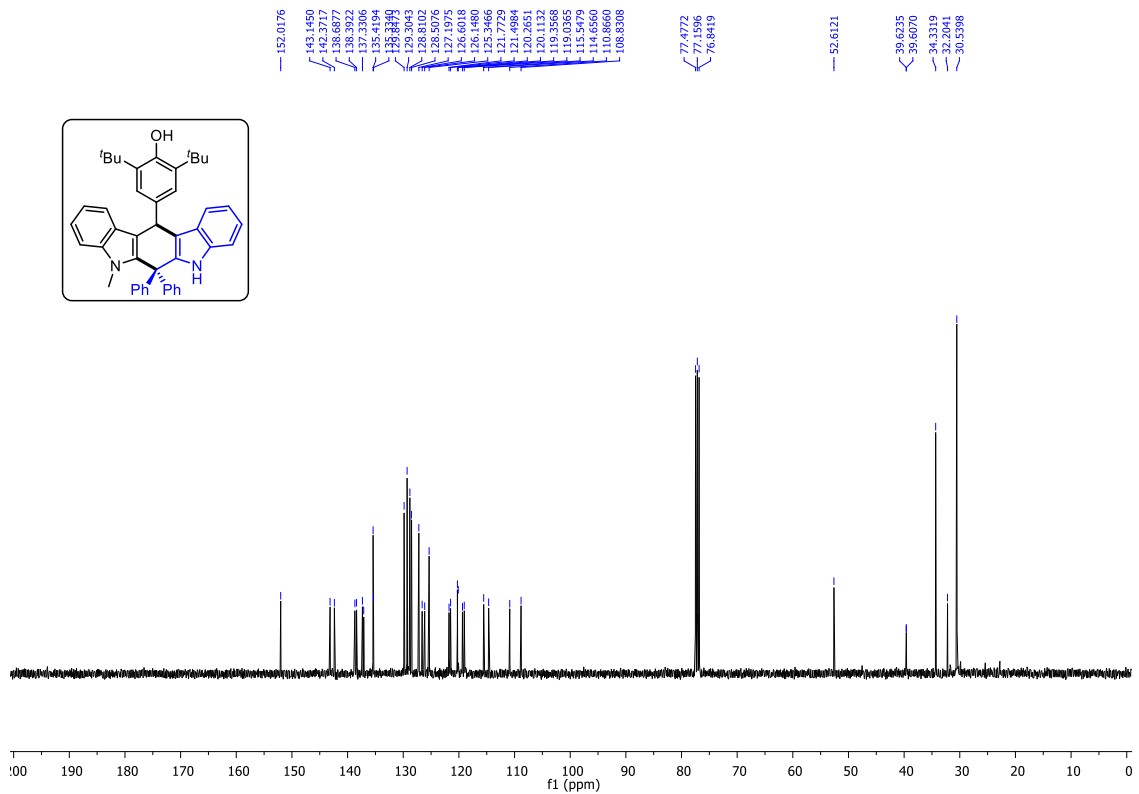

### $^1\text{H}$ NMR (400 MHz, $\text{CDCl}_3$ ) Spectrum of **3b**

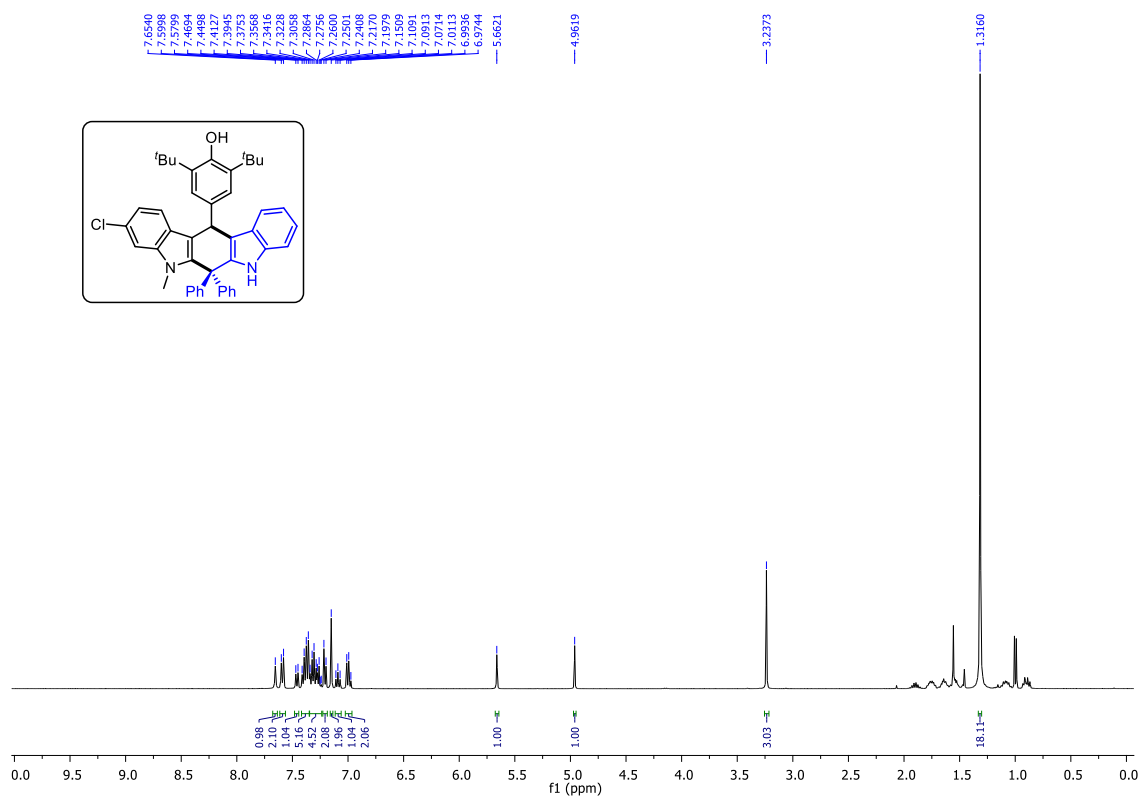

### $^{13}\text{C}$ $\{^1\text{H}\}$ NMR (100 MHz, $\text{CDCl}_3$ ) Spectrum of **3b**

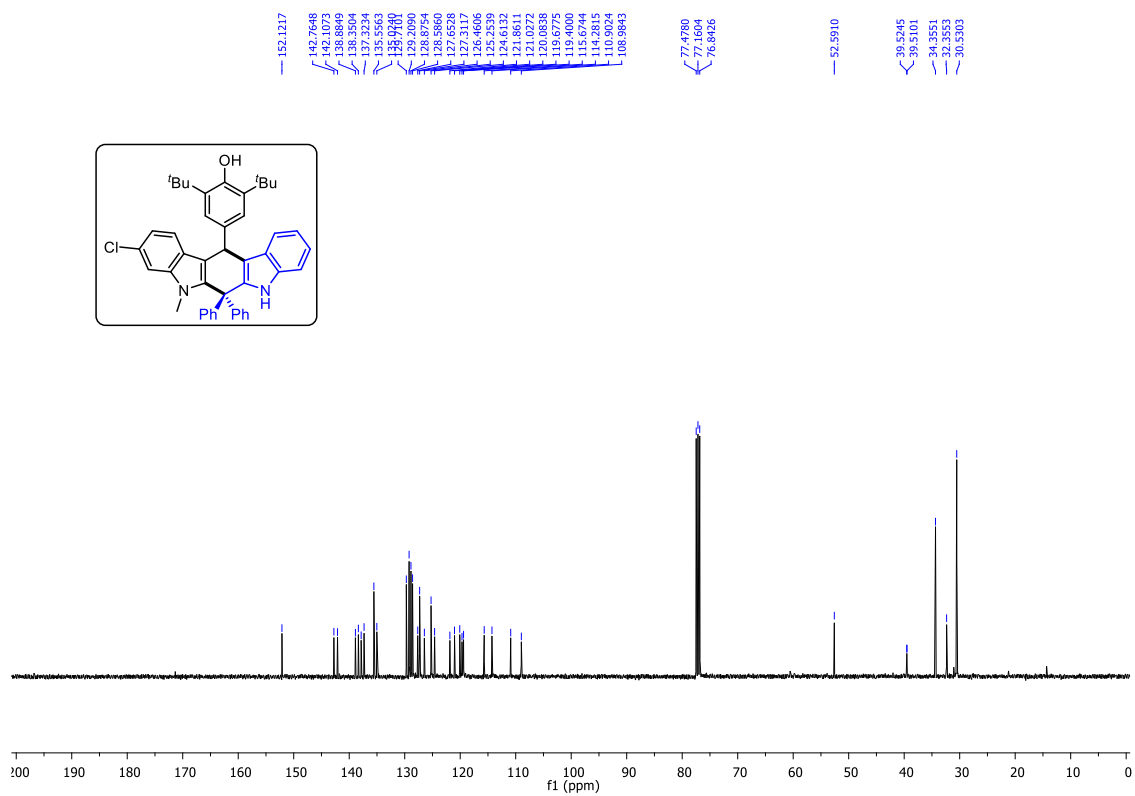

### <sup>1</sup>H NMR (400 MHz, CDCl<sub>3</sub>) Spectrum of **3c**

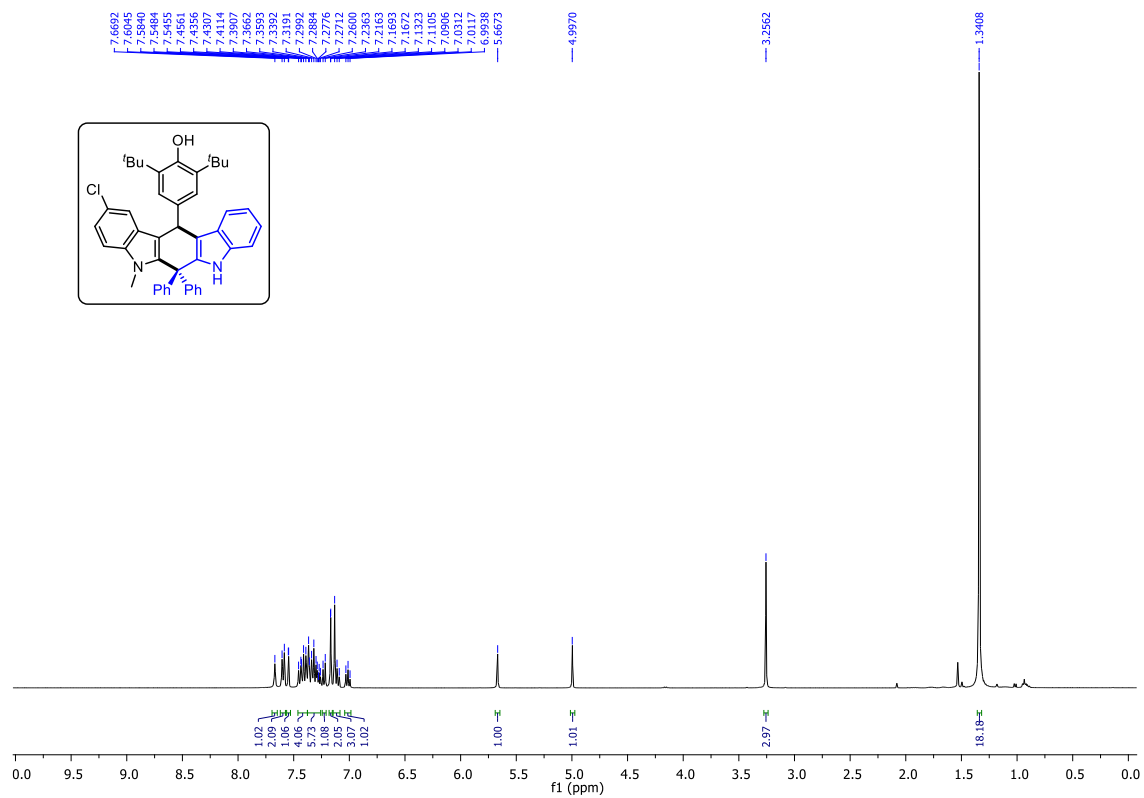

### <sup>13</sup>C {<sup>1</sup>H} NMR (100 MHz, CDCl<sub>3</sub>) Spectrum of **3c**

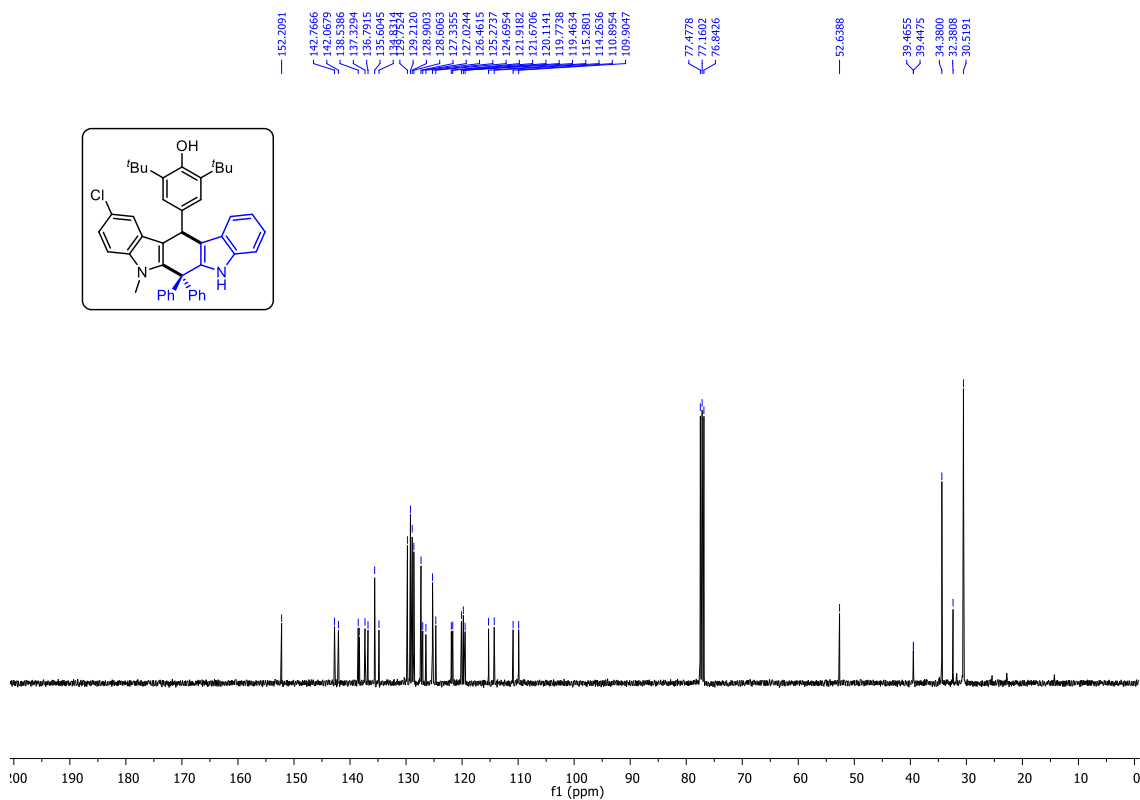



### $^1\text{H}$ NMR (400 MHz, $\text{CDCl}_3$ ) Spectrum of **3d**

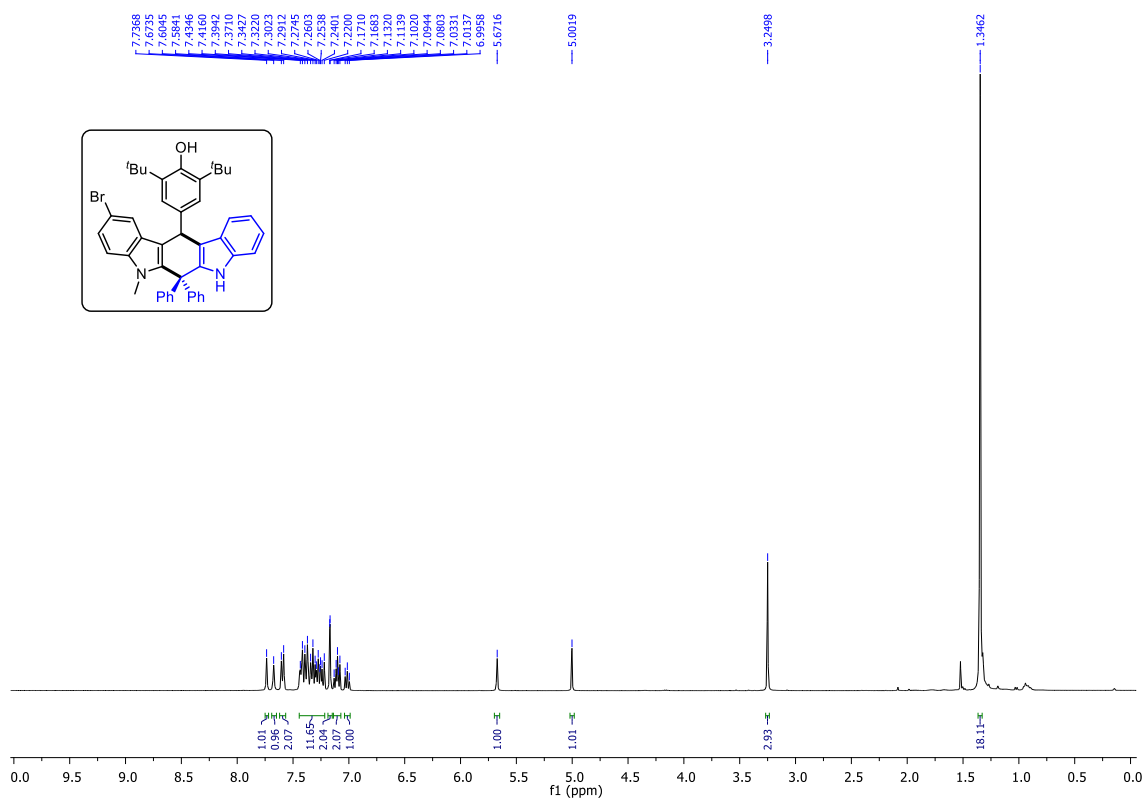

### $^{13}\text{C}$ { $^1\text{H}$ } NMR (100 MHz, $\text{CDCl}_3$ ) Spectrum of **3d**

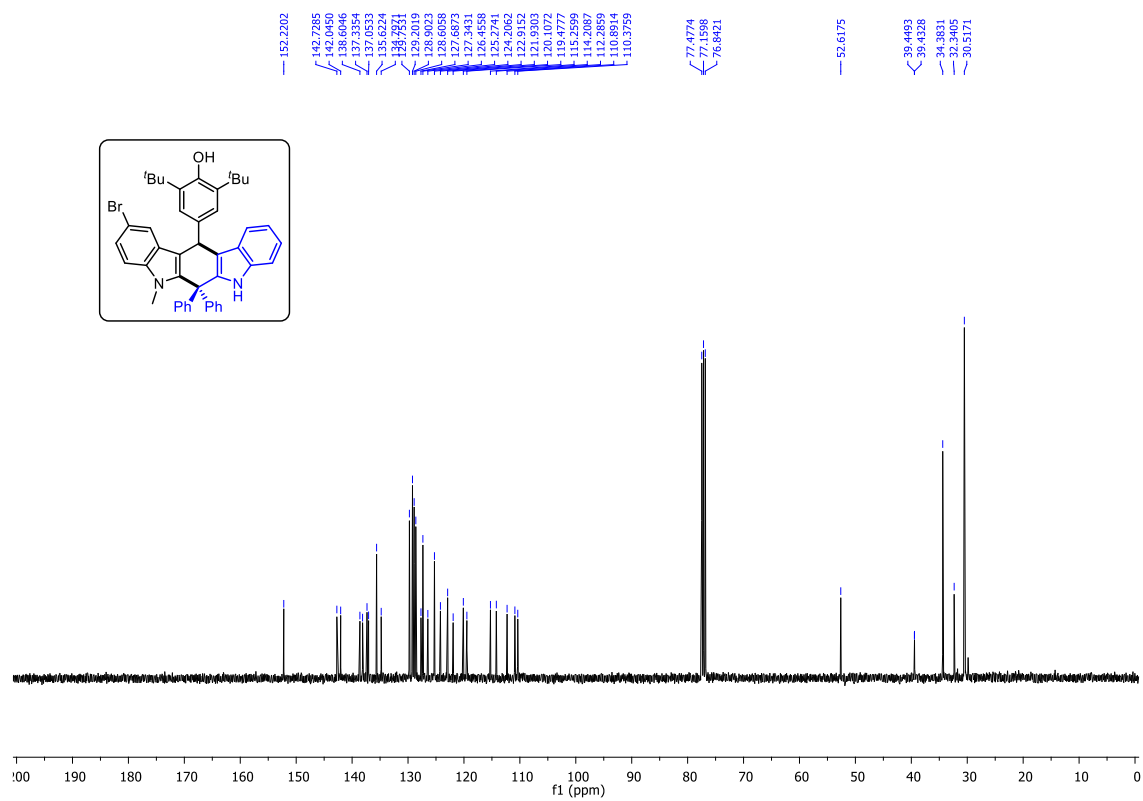

### <sup>1</sup>H NMR (400 MHz, CDCl<sub>3</sub>) Spectrum of **3e**

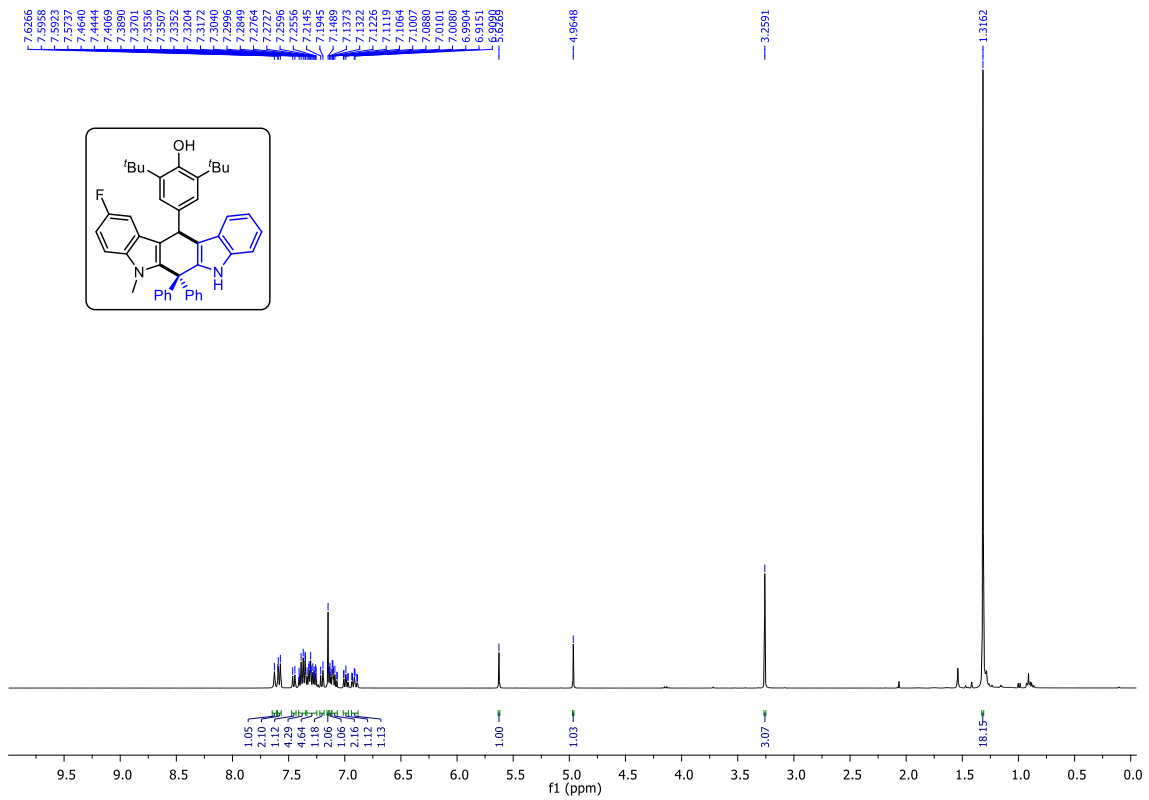

### <sup>13</sup>C {<sup>1</sup>H} NMR (100 MHz, CDCl<sub>3</sub>) Spectrum of **3e**

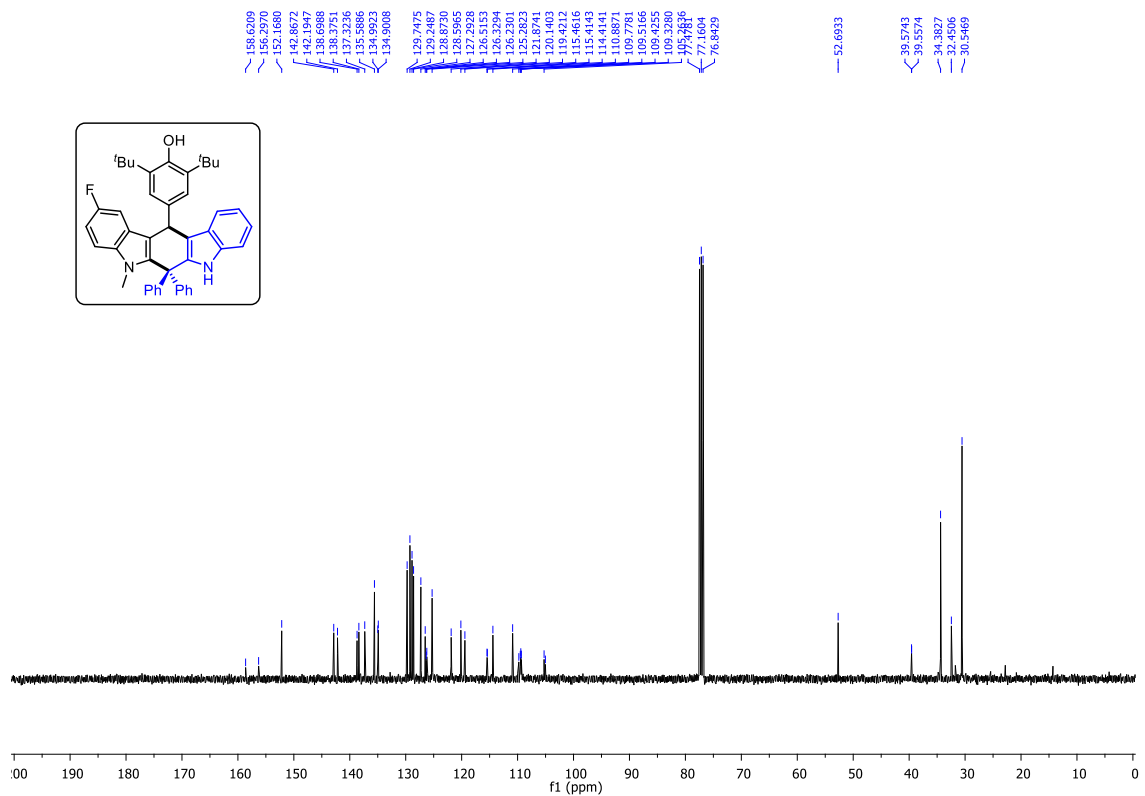

$^{19}\text{F}$   $\{^1\text{H}\}$  NMR (376 MHz,  $\text{CDCl}_3$ ) Spectrum of **3e**

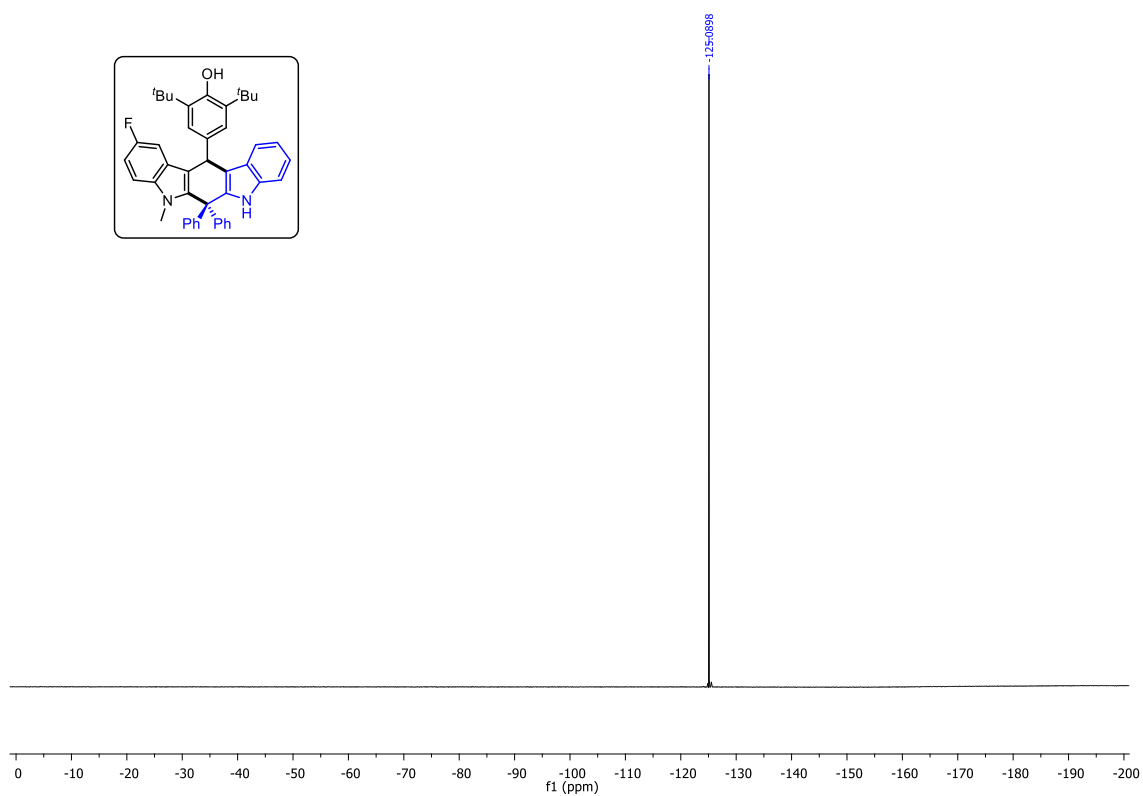

$^1\text{H}$  NMR (400 MHz,  $\text{CDCl}_3$ ) Spectrum of **3f**

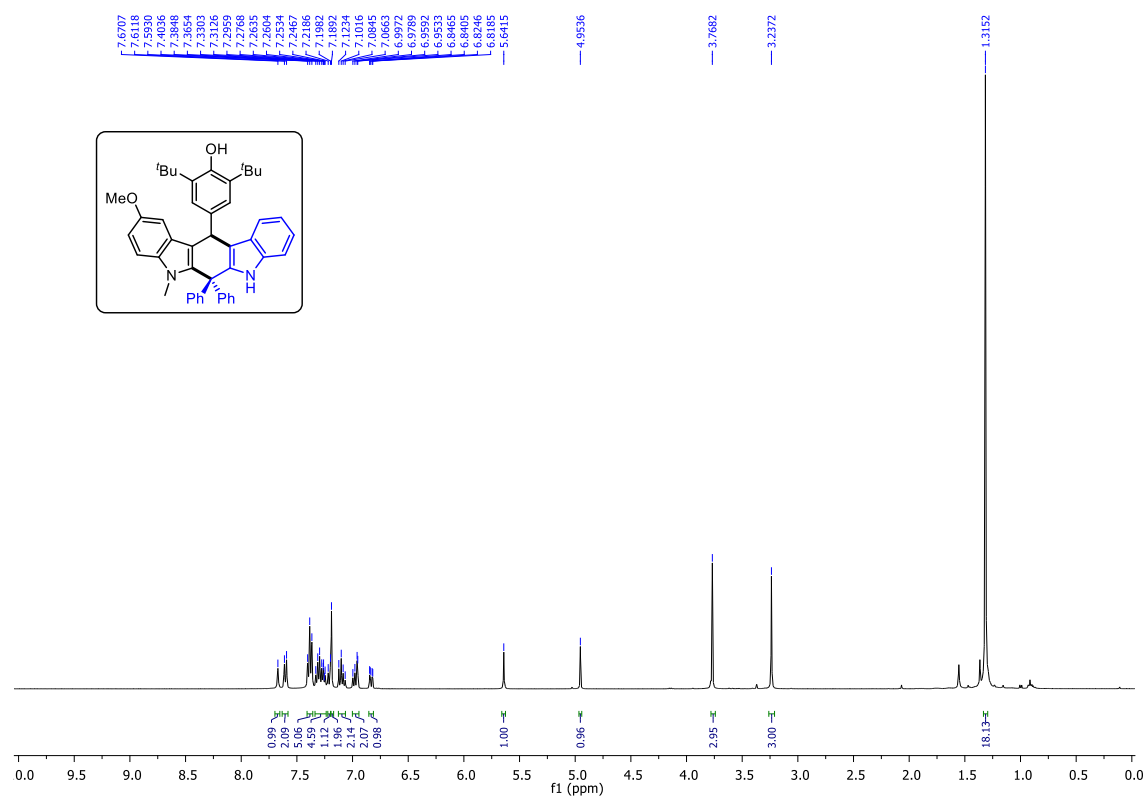

### $^{13}\text{C}$ { $^1\text{H}$ } NMR (100 MHz, $\text{CDCl}_3$ ) Spectrum of **3f**

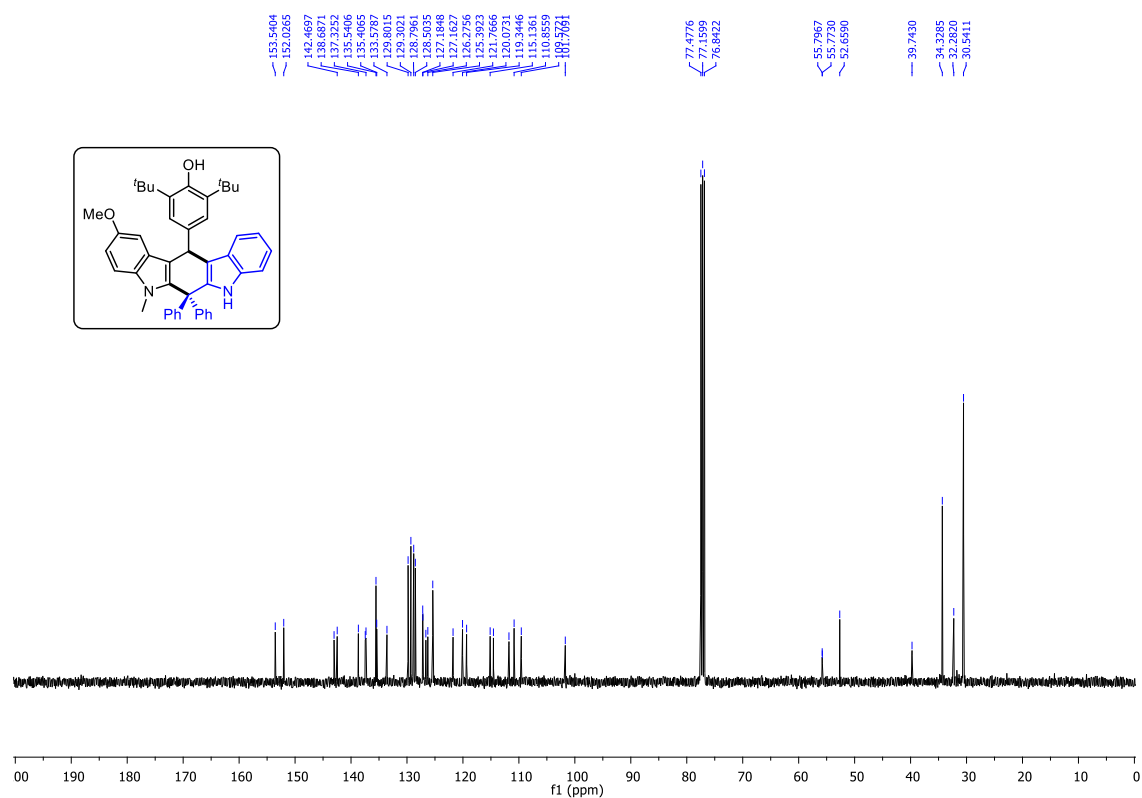

### $^1\text{H}$ NMR (400 MHz, $\text{CDCl}_3$ ) Spectrum of **3g**

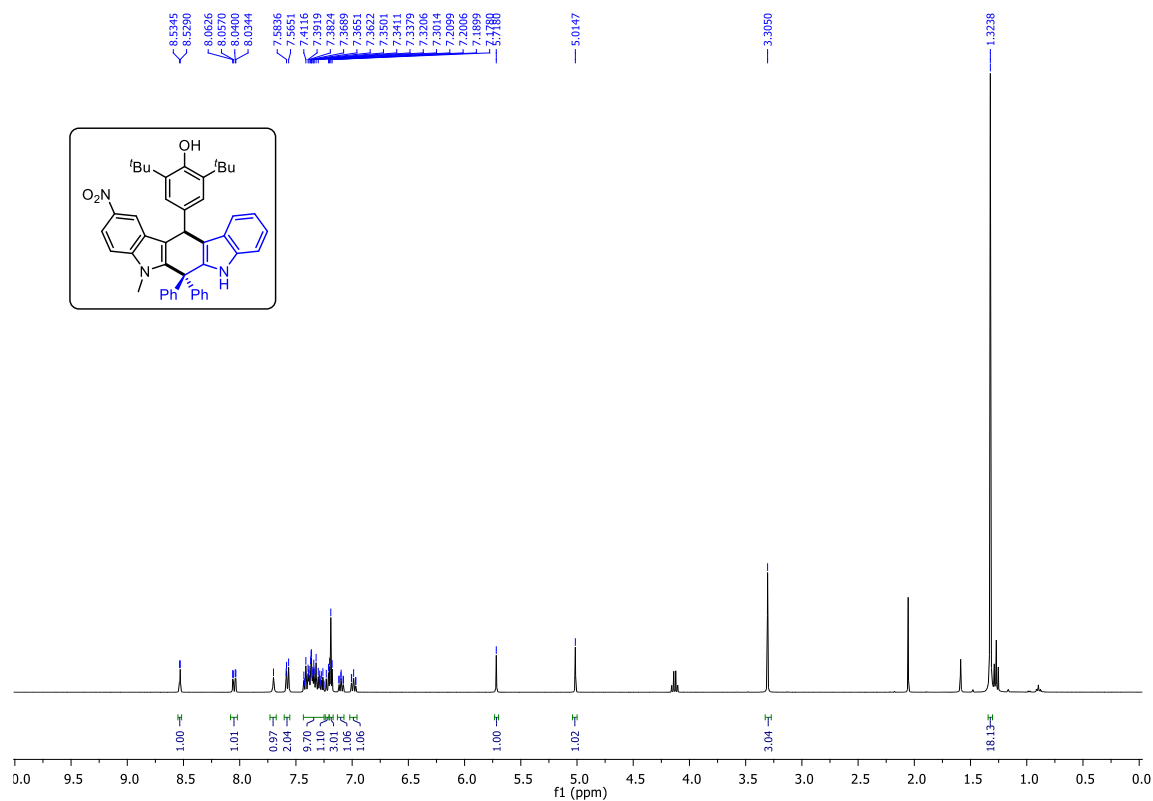

### $^{13}\text{C}$ $\{^1\text{H}\}$ NMR (100 MHz, $\text{CDCl}_3$ ) Spectrum of **3g**

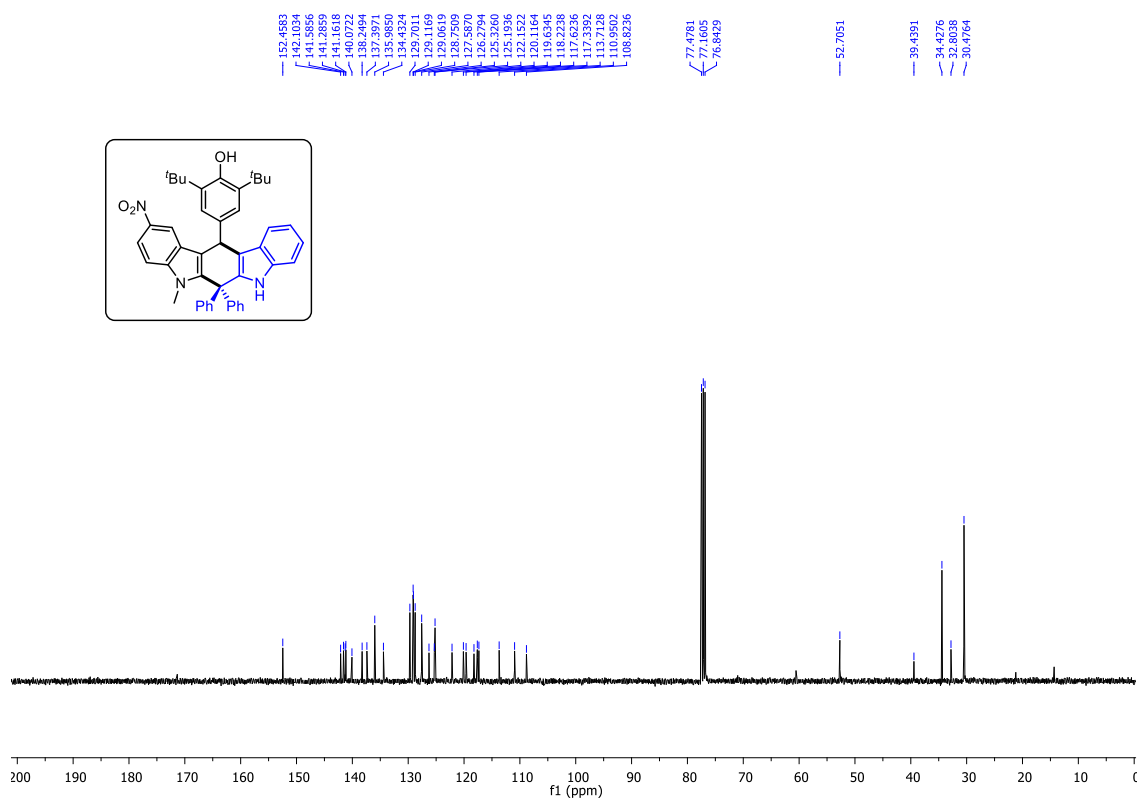

### $^1\text{H}$ NMR (400 MHz, $\text{DMSO-d}_6$ ) Spectrum of **3h**

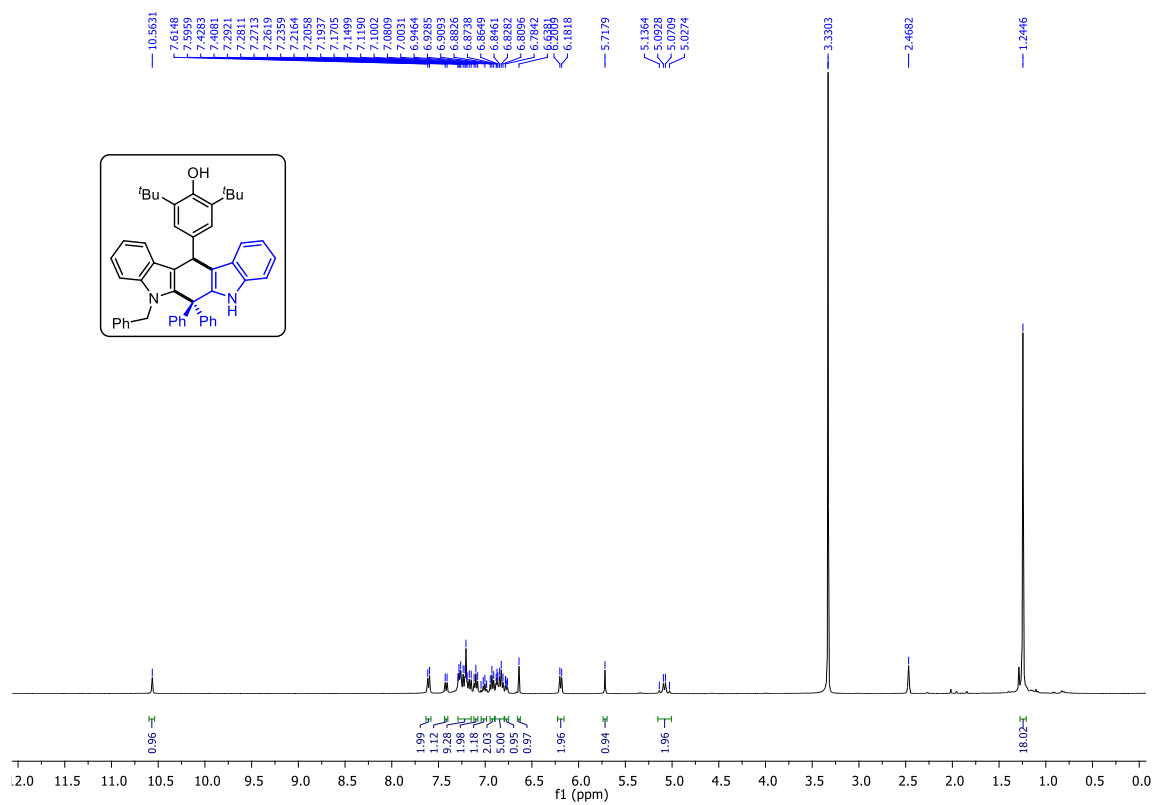

### $^{13}\text{C}$ $\{^1\text{H}\}$ NMR (100 MHz, DMSO- $d_6$ ) Spectrum of **3h**

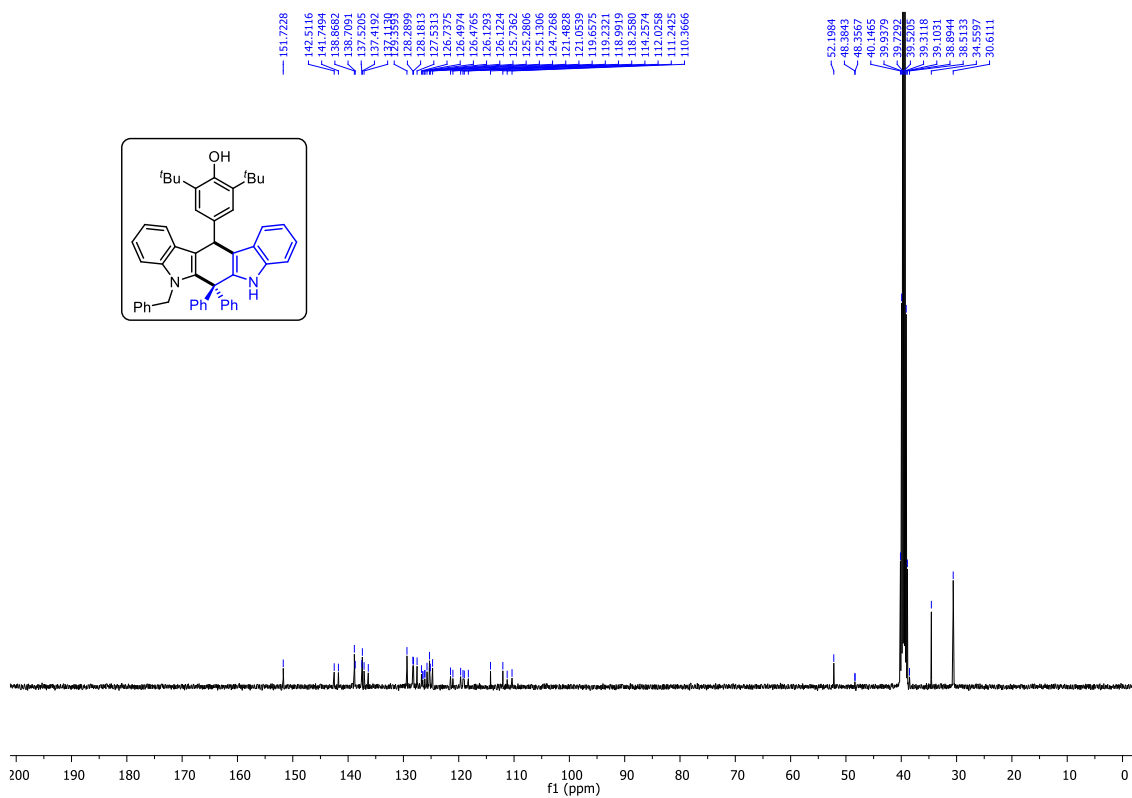

### $^1\text{H}$ NMR (400 MHz, DMSO- $d_6$ ) Spectrum of **3i**

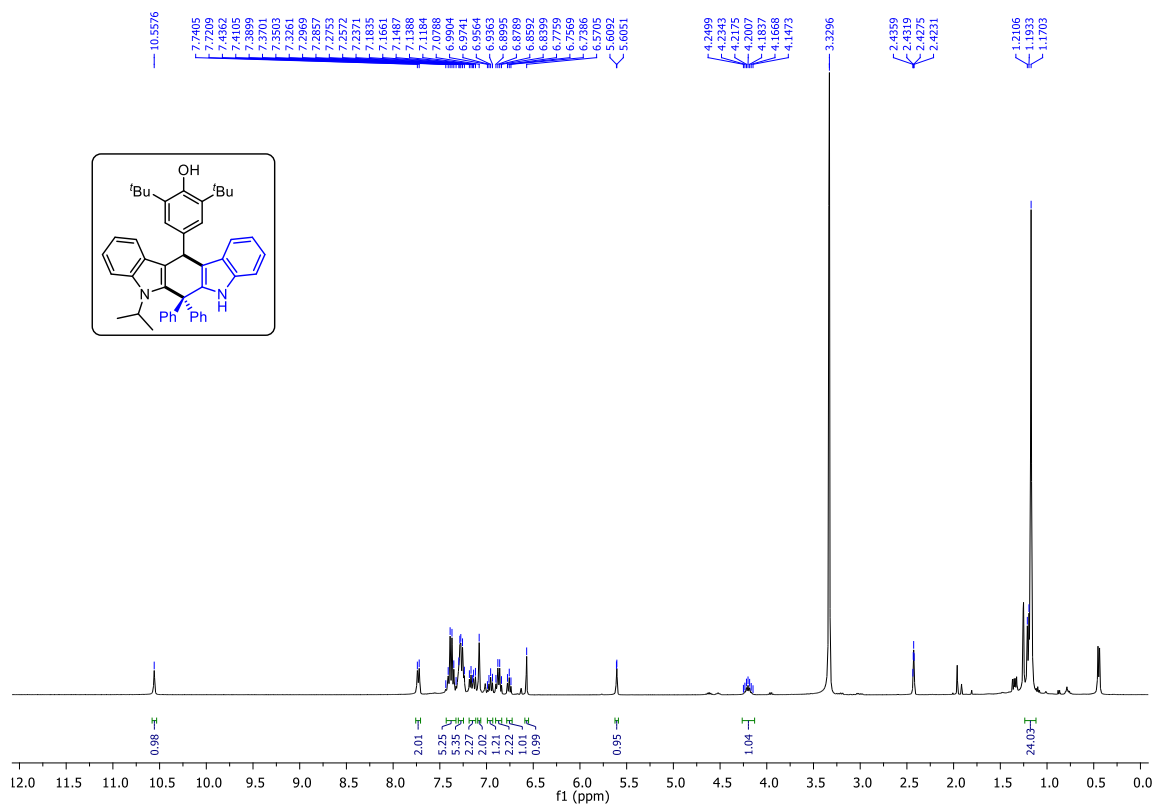

### $^{13}\text{C}$ { $^1\text{H}$ } NMR (100 MHz, DMSO- $d_6$ ) Spectrum of **3i**

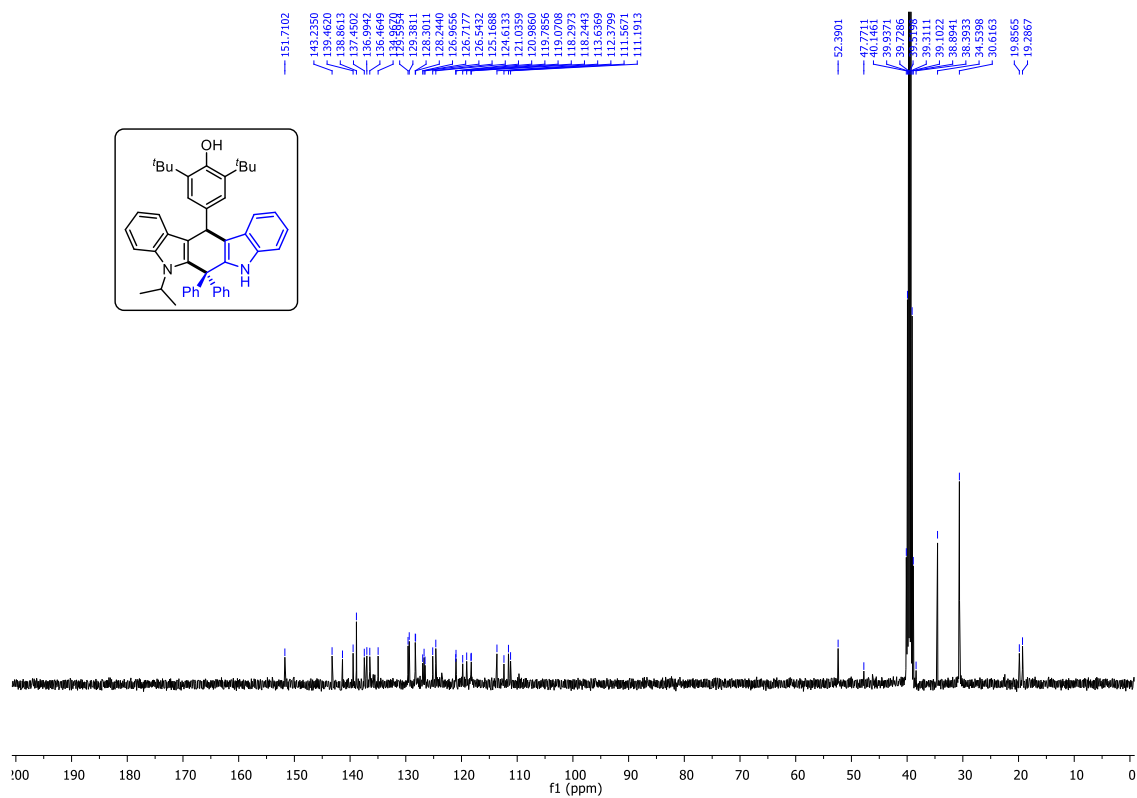

### $^1\text{H}$ NMR (400 MHz, $\text{CDCl}_3$ ) Spectrum of **3j**

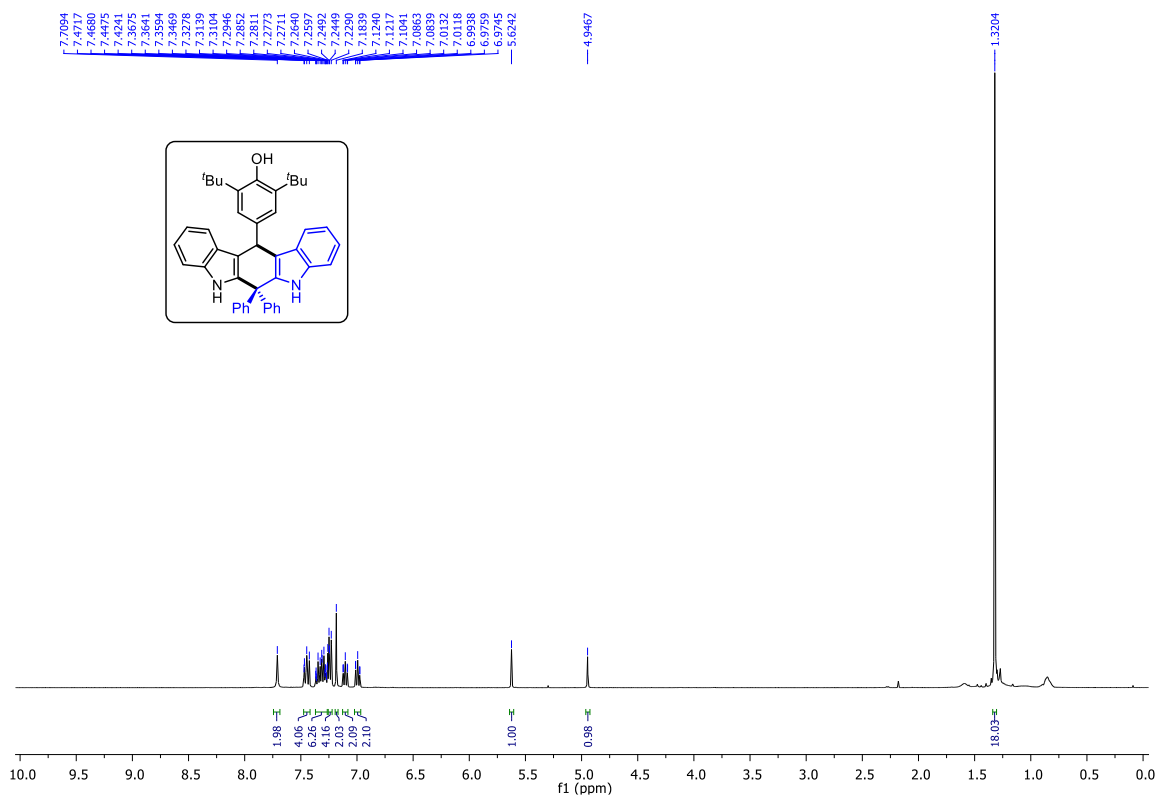

$^{13}\text{C}$   $\{^1\text{H}\}$  NMR (100 MHz,  $\text{CDCl}_3$ ) Spectrum of **3j**

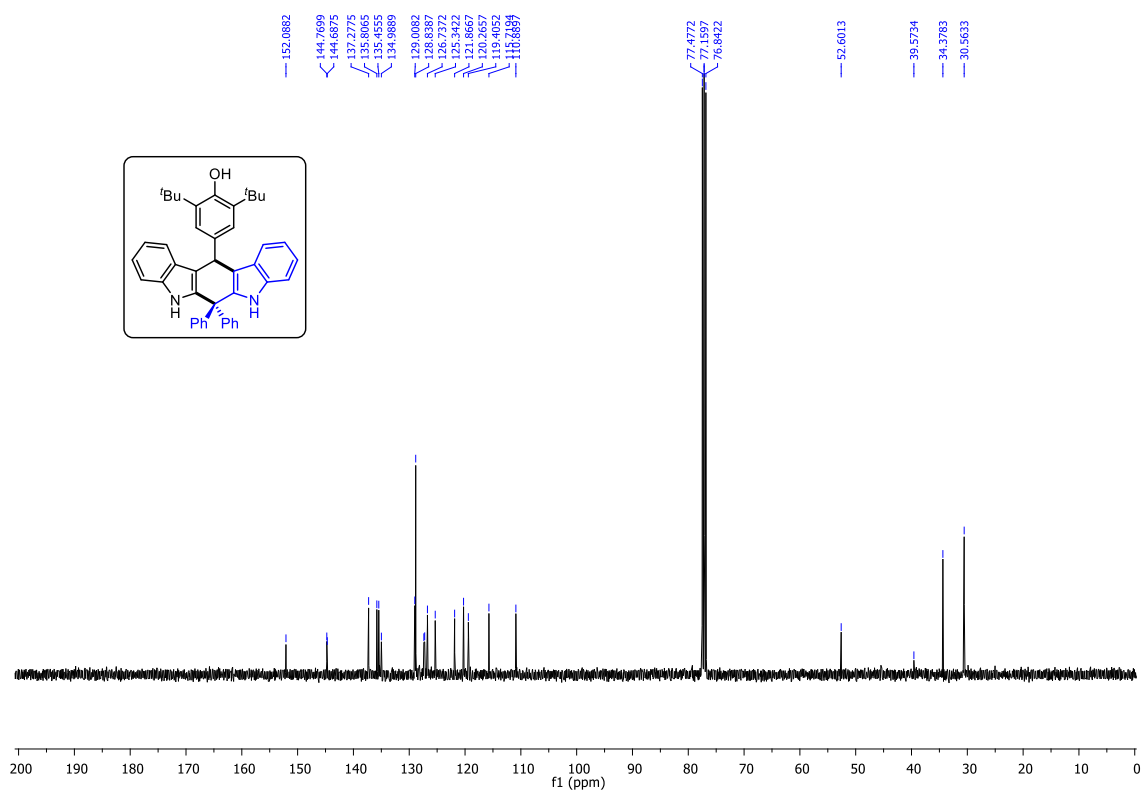

$^1\text{H}$  NMR (400 MHz,  $\text{CDCl}_3$ ) Spectrum of **3k**

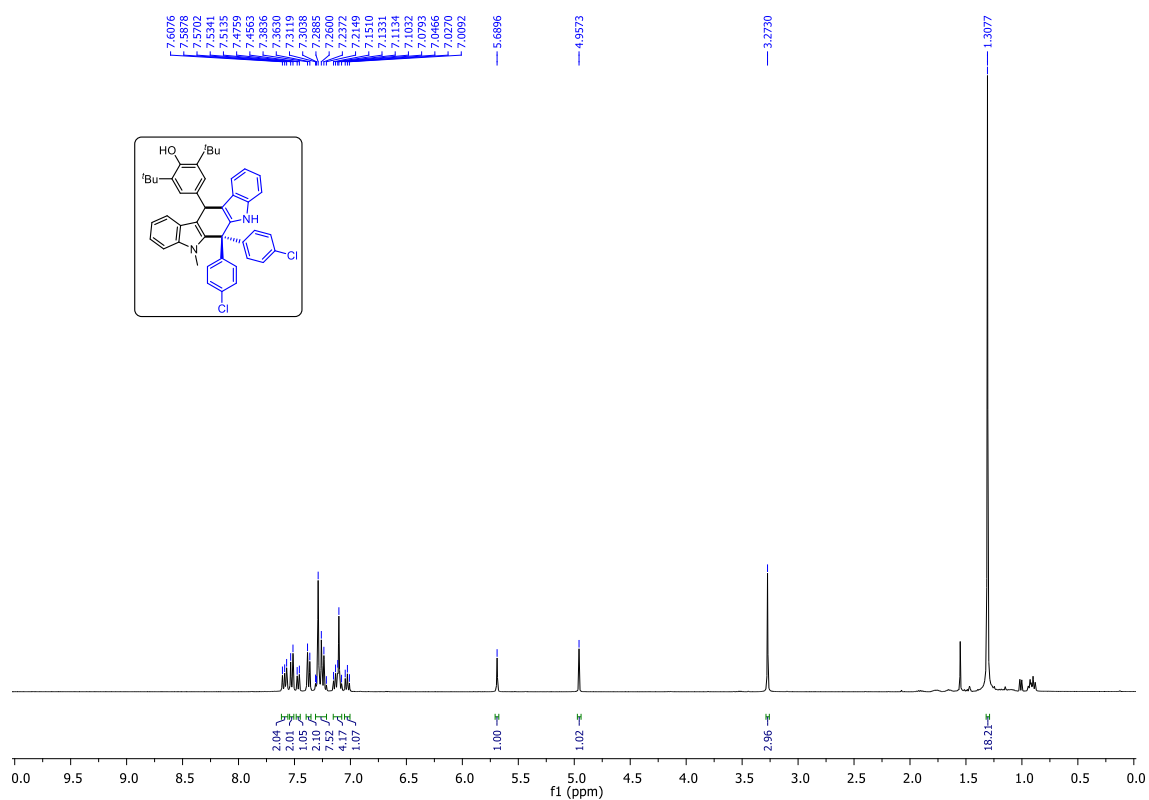



### $^{13}\text{C}$ { $^1\text{H}$ } NMR (100 MHz, $\text{CDCl}_3$ ) Spectrum of **3k**

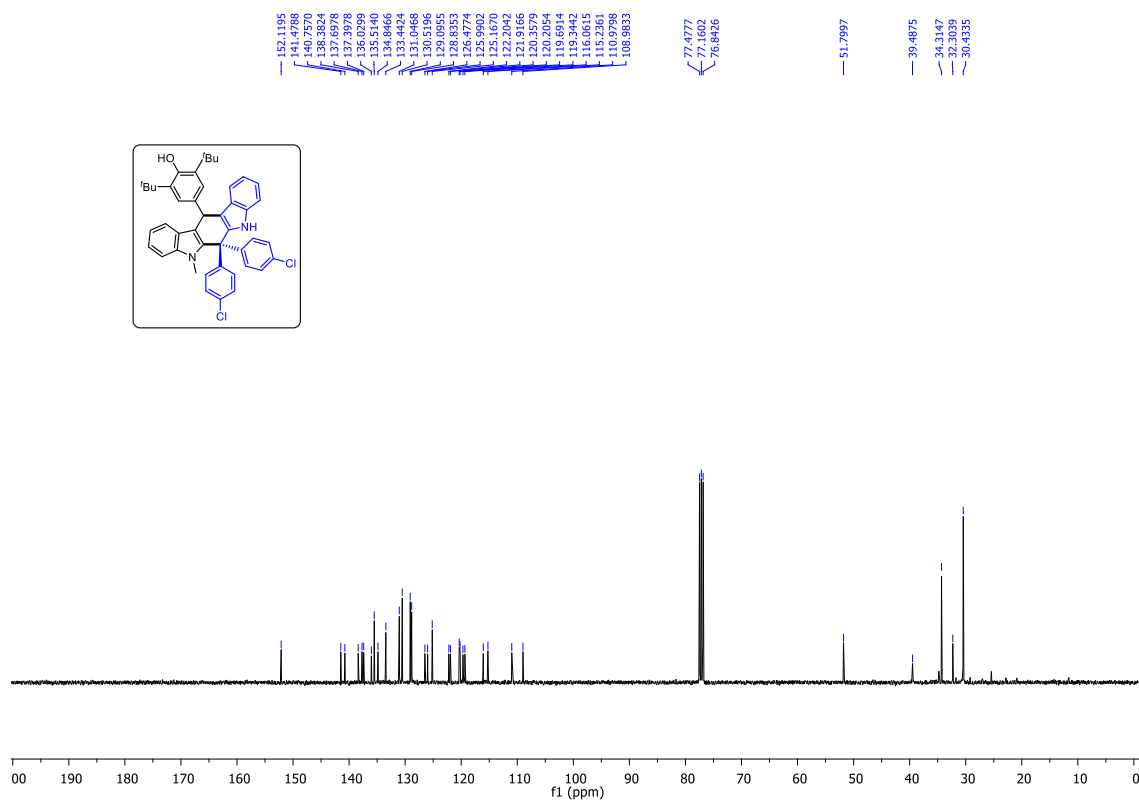

### $^1\text{H}$ NMR (400 MHz, $\text{CDCl}_3$ ) Spectrum of **3l**

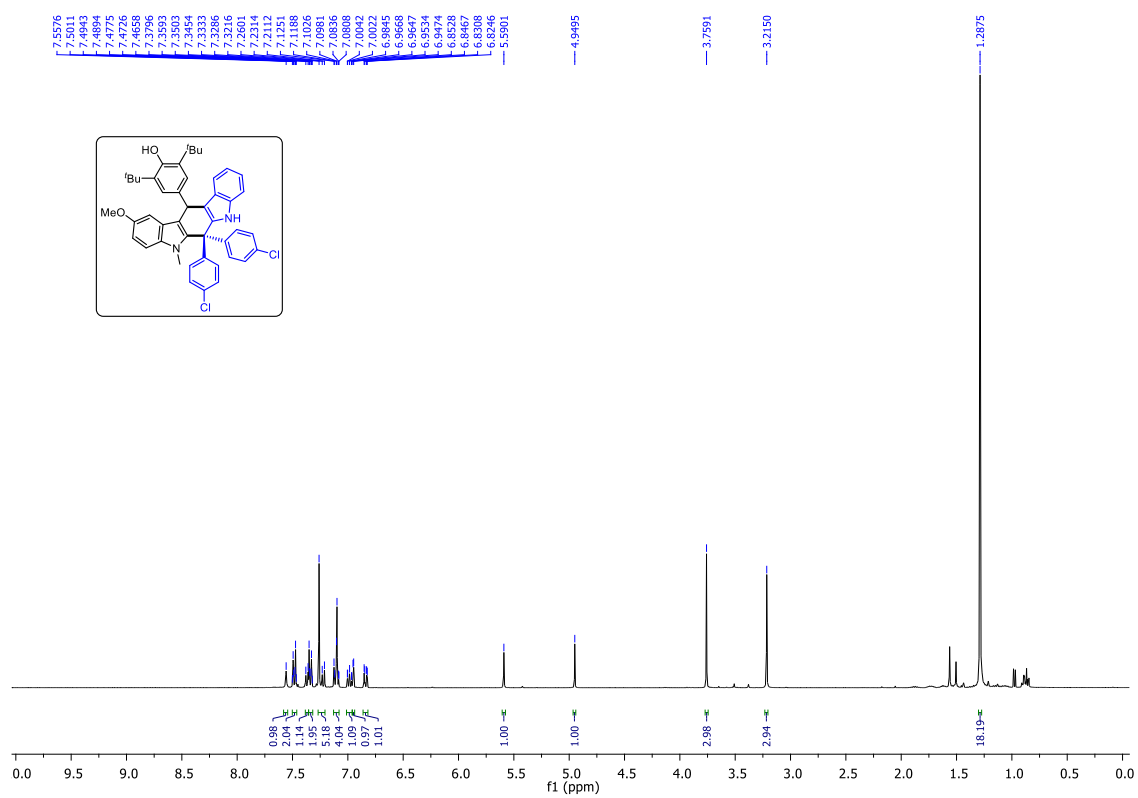

### $^{13}\text{C}$ { $^1\text{H}$ } NMR (100 MHz, $\text{CDCl}_3$ ) Spectrum of **3l**

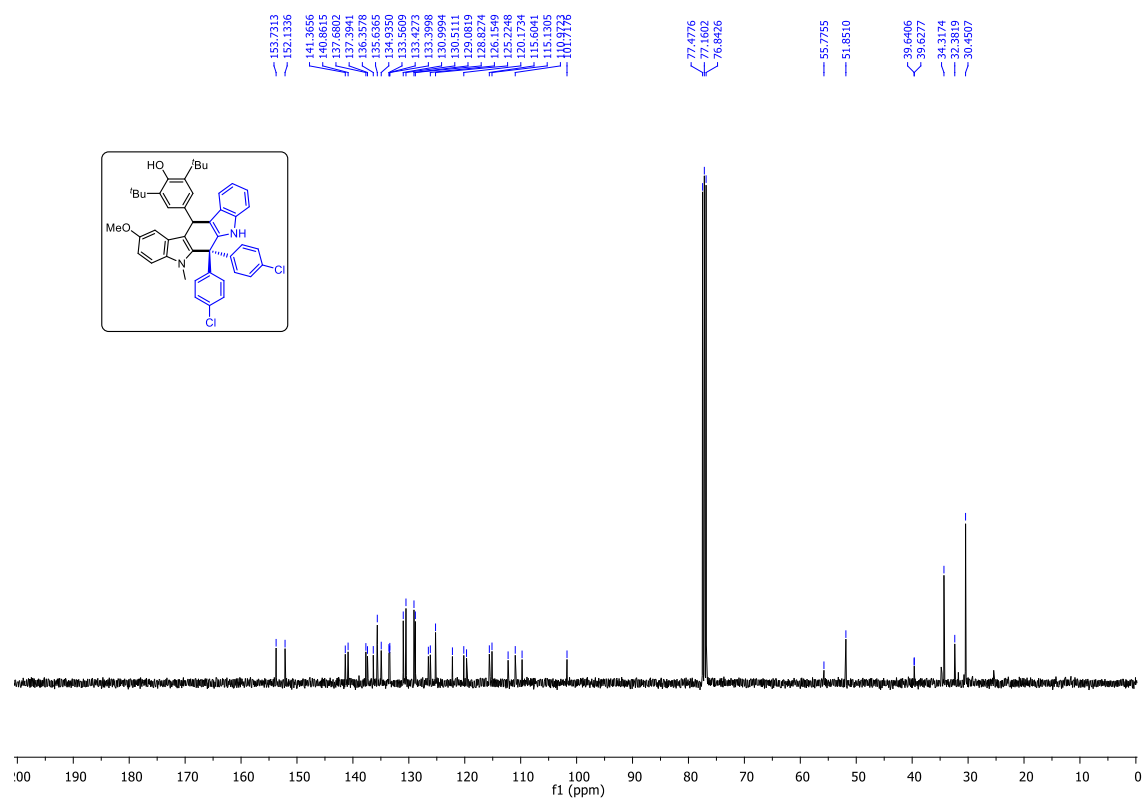

### $^1\text{H}$ NMR (400 MHz, $\text{CDCl}_3$ ) Spectrum of **3m**

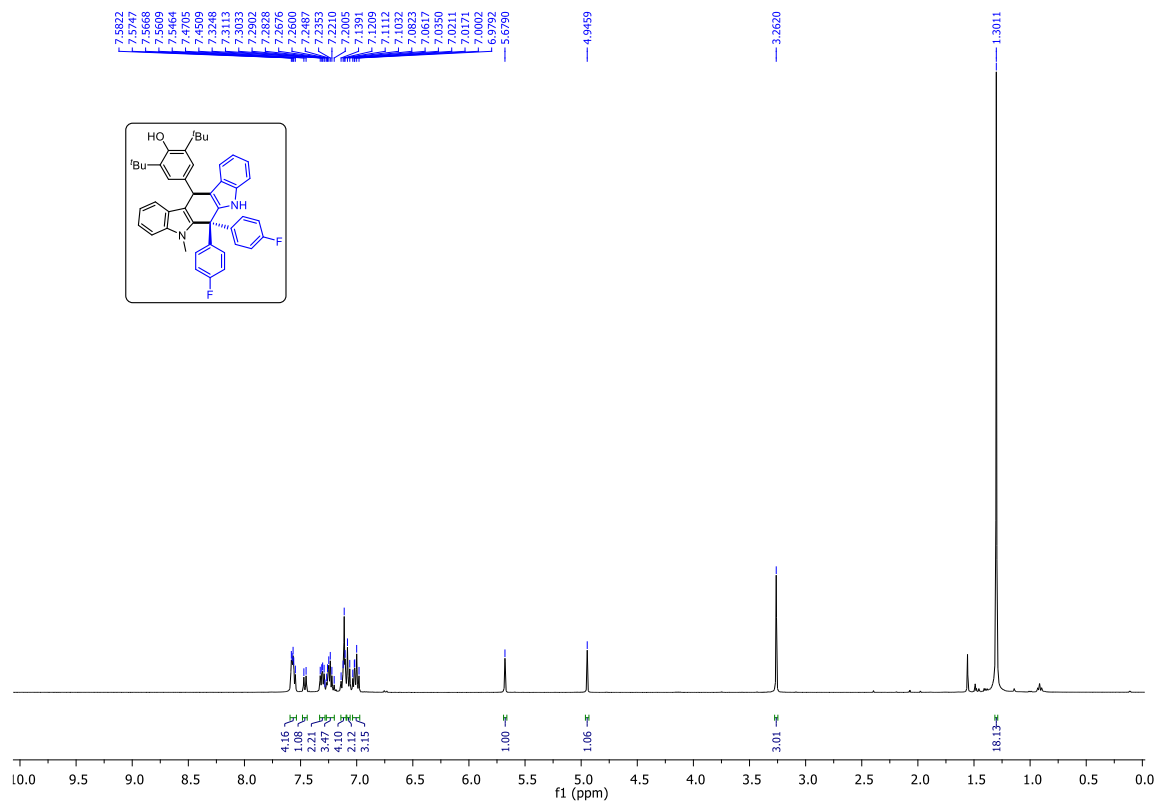

$^{13}\text{C}$   $\{^1\text{H}\}$  NMR (100 MHz,  $\text{CDCl}_3$ ) Spectrum of **3m**

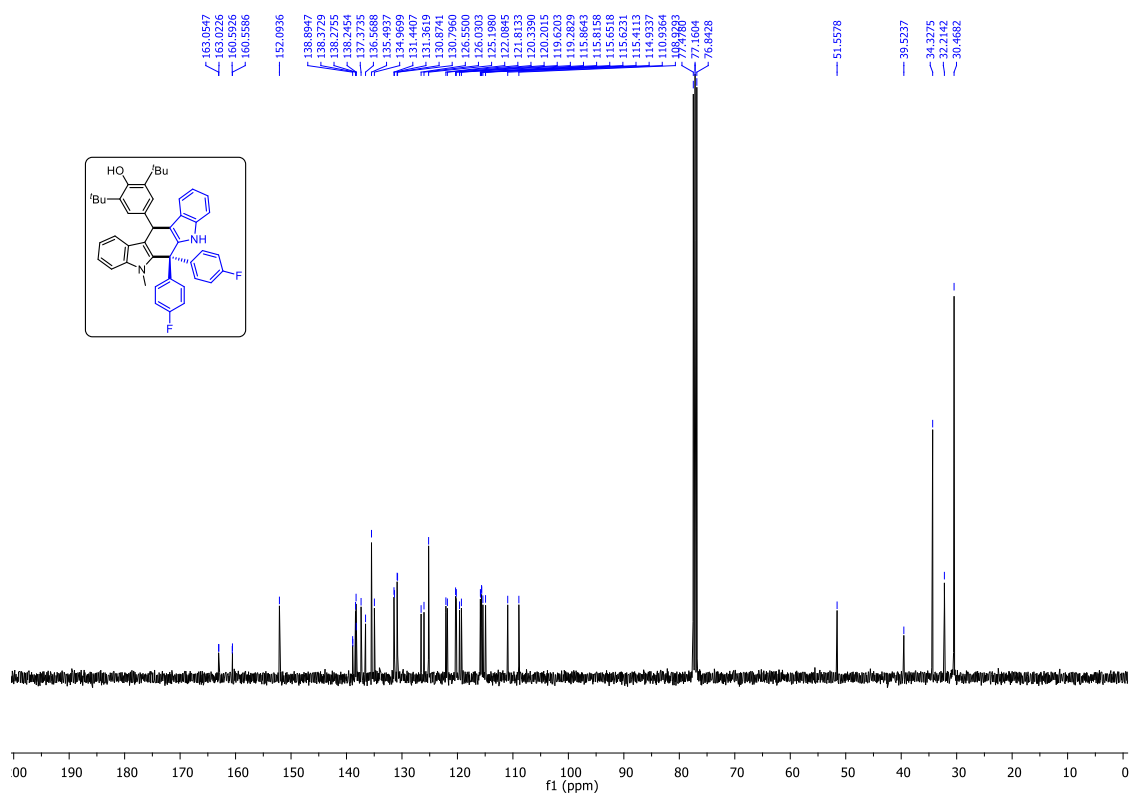

$^{19}\text{F}$   $\{^1\text{H}\}$  NMR (376 MHz,  $\text{CDCl}_3$ ) Spectrum of **3m**

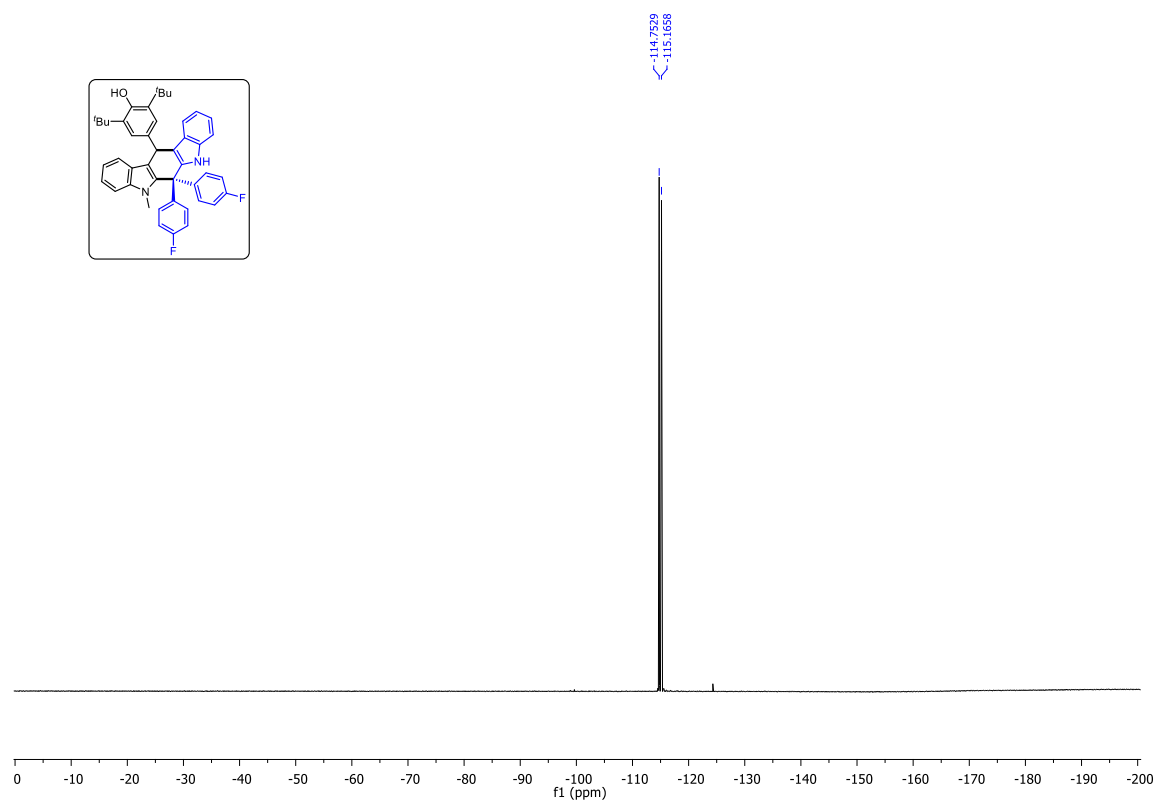

### <sup>1</sup>H NMR (400 MHz, DMSO-d<sub>6</sub>) Spectrum of **3n**

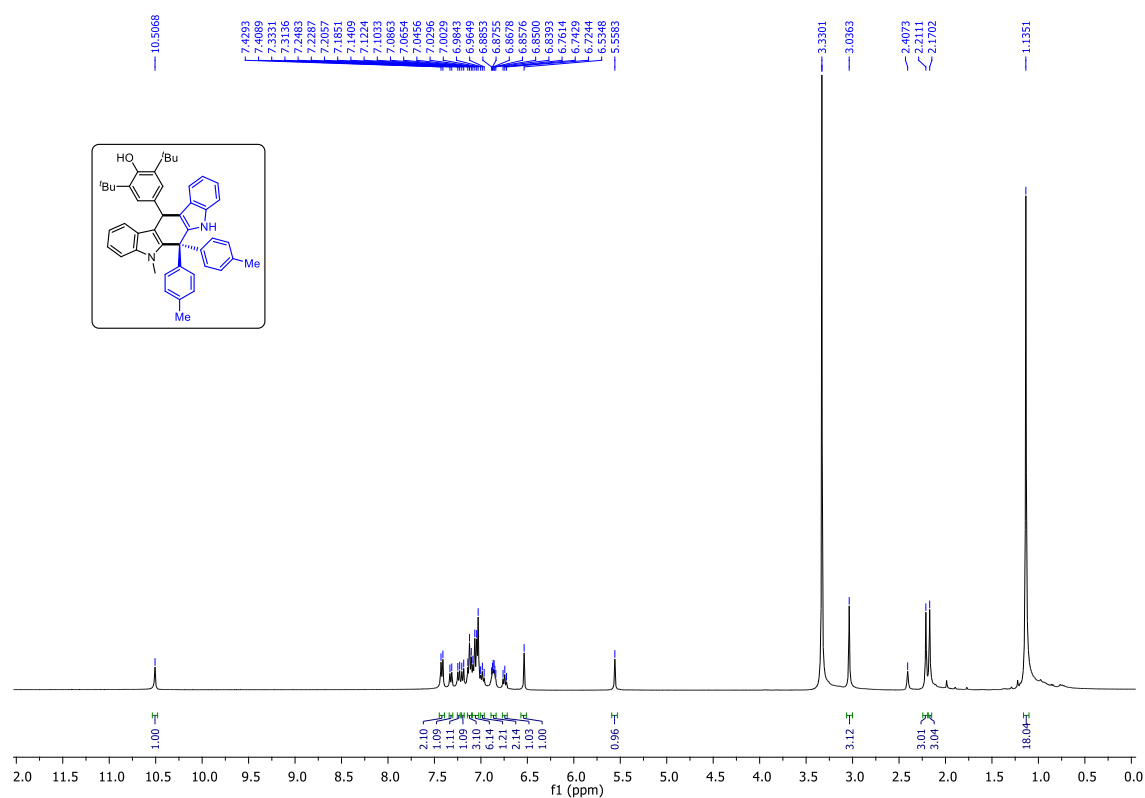

### <sup>13</sup>C {<sup>1</sup>H} NMR (100 MHz, DMSO-d<sub>6</sub>) Spectrum of **3n**

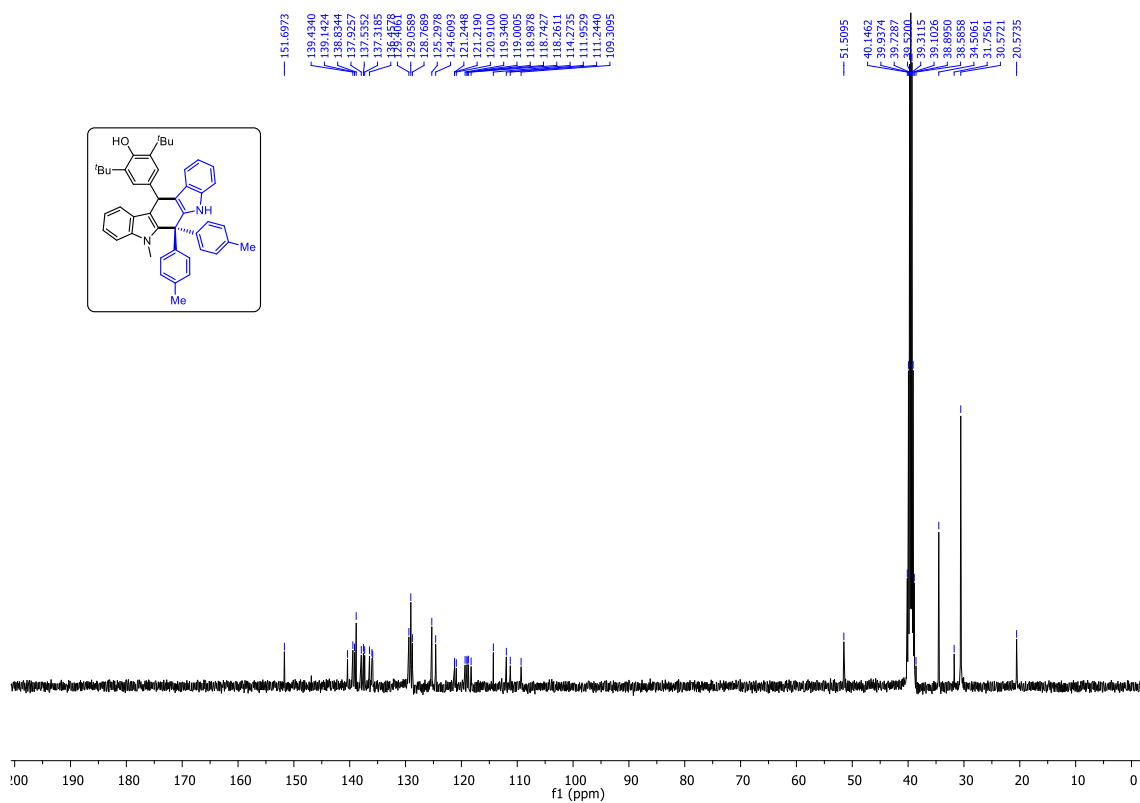

<sup>1</sup>H NMR (400 MHz, DMSO-d<sub>6</sub>) Spectrum of **30**

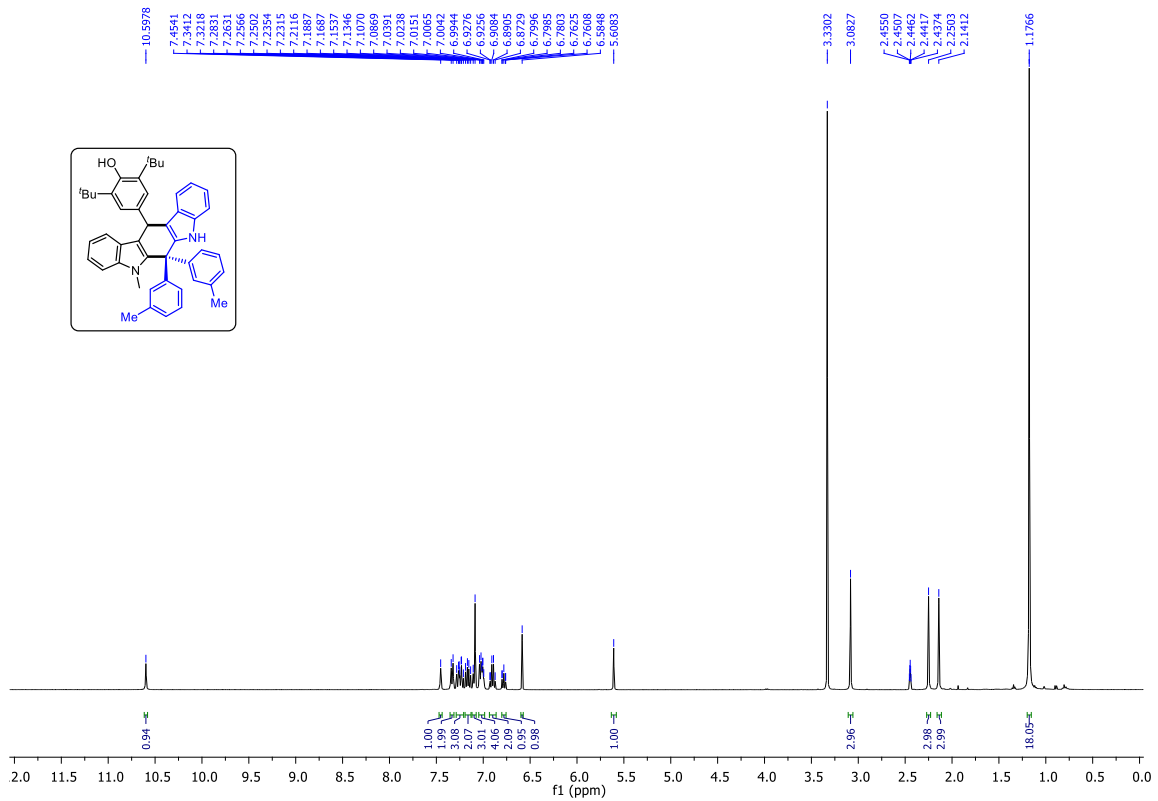

<sup>13</sup>C {<sup>1</sup>H} NMR (100 MHz, DMSO-d<sub>6</sub>) Spectrum of **30**

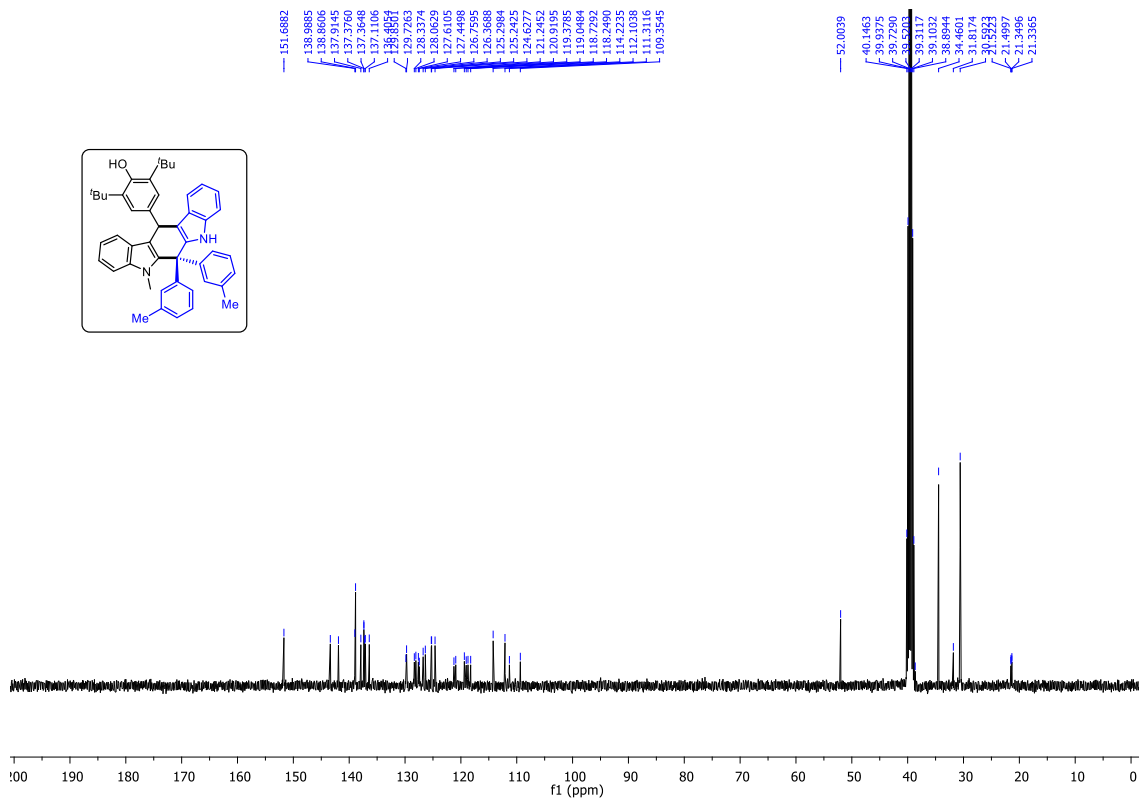

### $^1\text{H}$ NMR (400 MHz, $\text{CDCl}_3$ ) Spectrum of **3p**

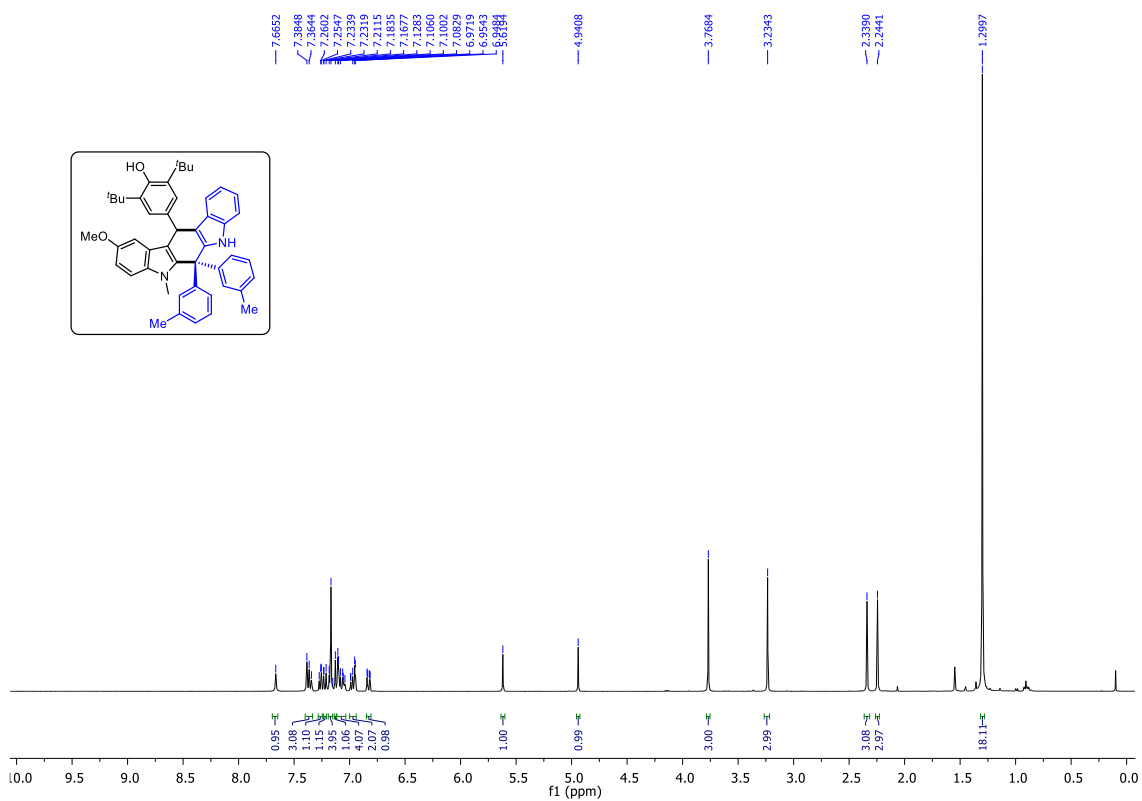

### $^{13}\text{C}$ $\{^1\text{H}\}$ NMR (100 MHz, $\text{CDCl}_3$ ) Spectrum of **3p**

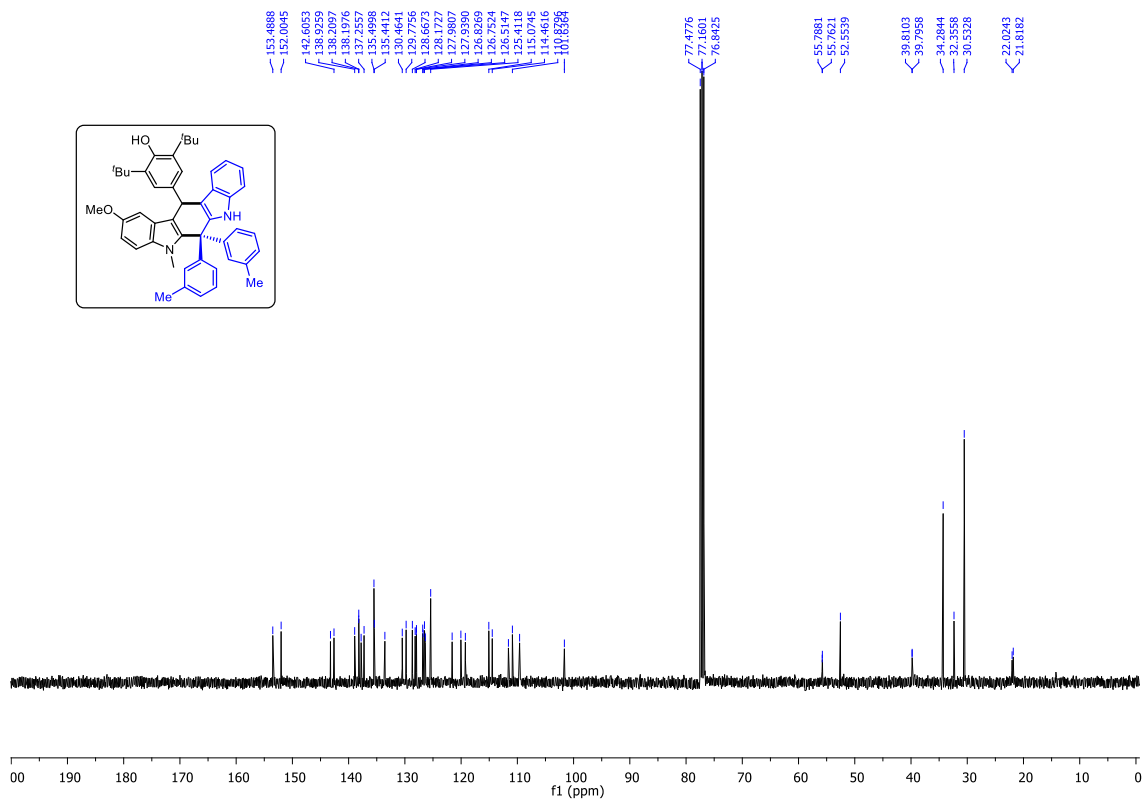

### $^1\text{H}$ NMR (400 MHz, $\text{CDCl}_3$ ) Spectrum of **3q**

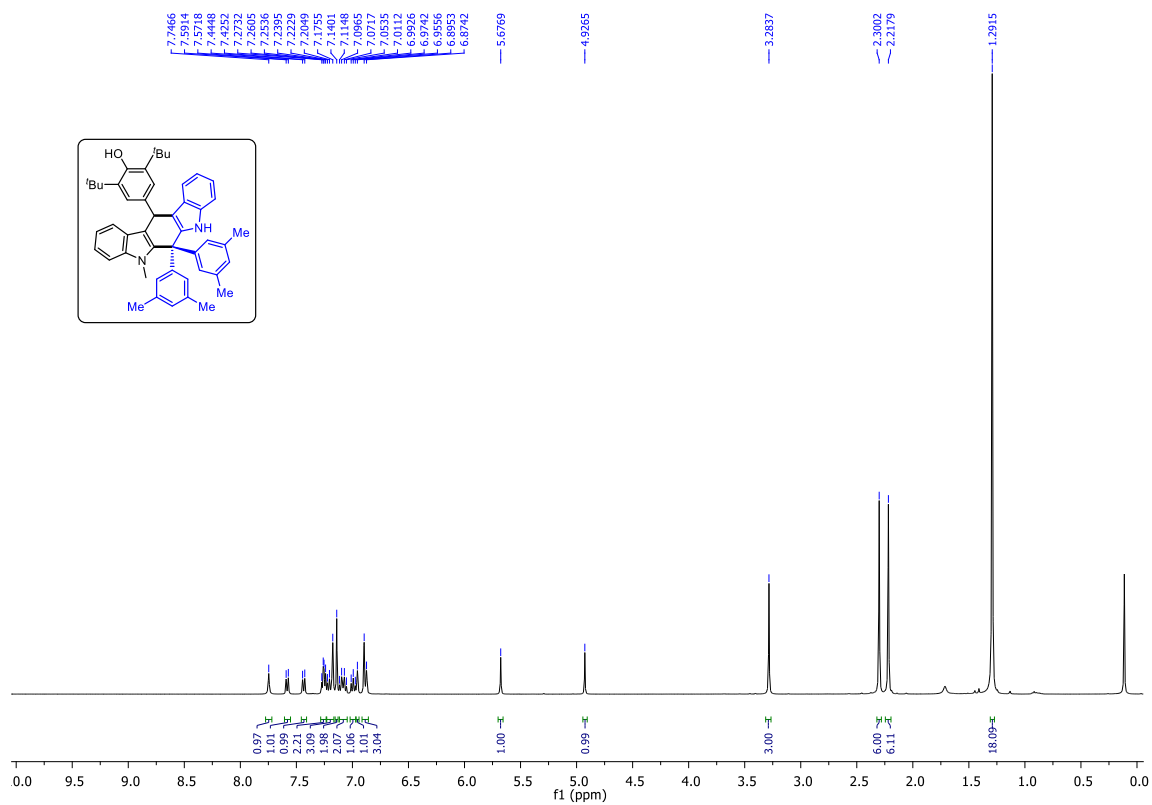

### $^{13}\text{C}$ { $^1\text{H}$ } NMR (100 MHz, $\text{CDCl}_3$ ) Spectrum of **3q**

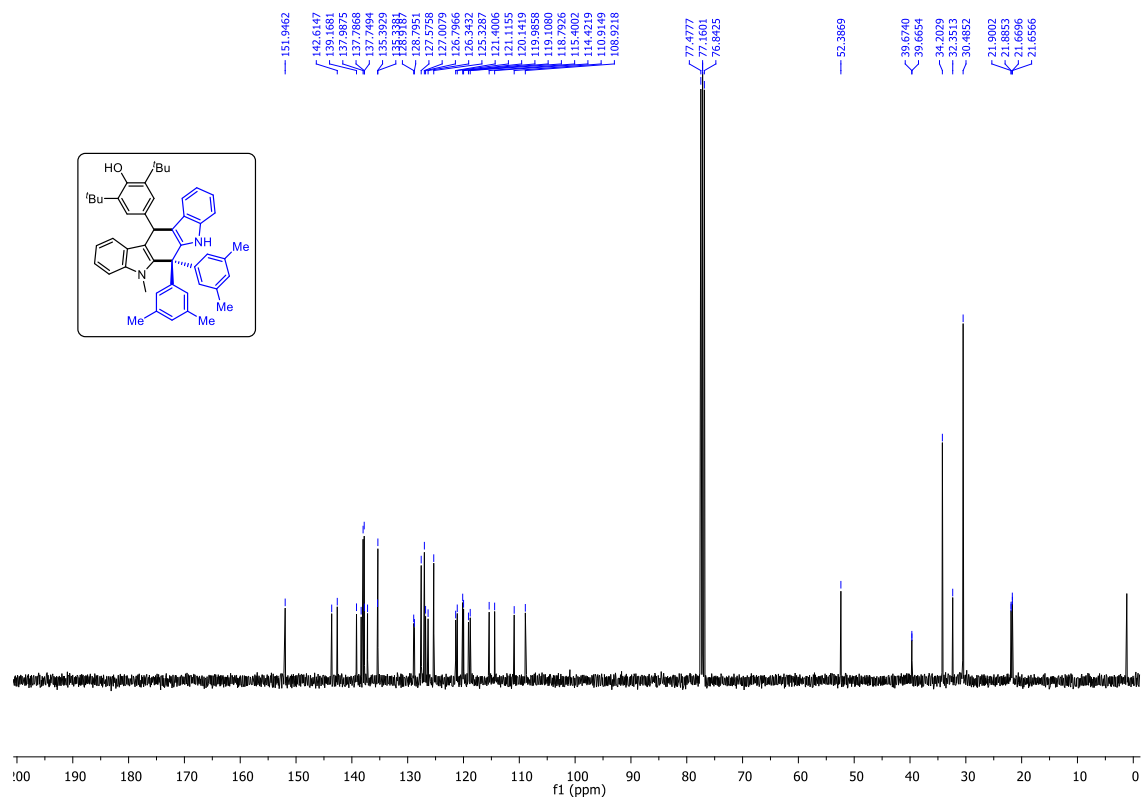

### <sup>1</sup>H NMR (400 MHz, DMSO-d<sub>6</sub>) Spectrum of **3r**

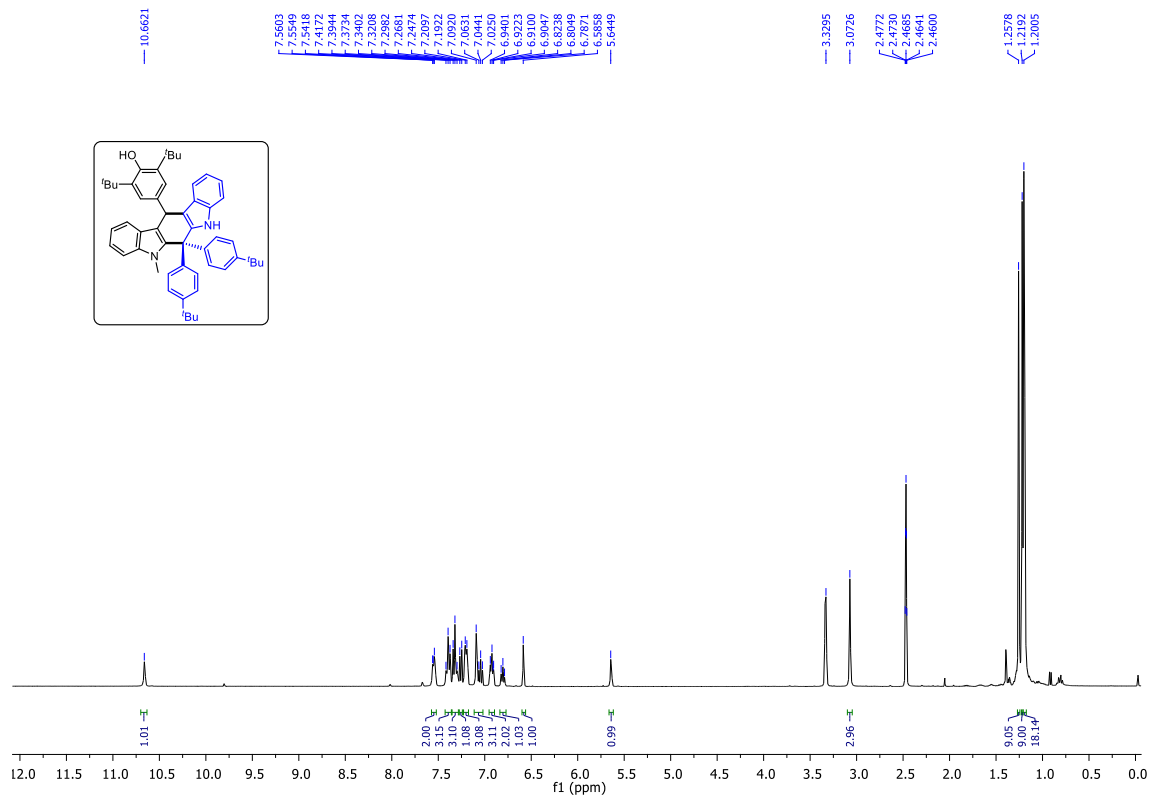

### <sup>13</sup>C {<sup>1</sup>H} NMR (100 MHz, DMSO-d<sub>6</sub>) Spectrum of **3r**

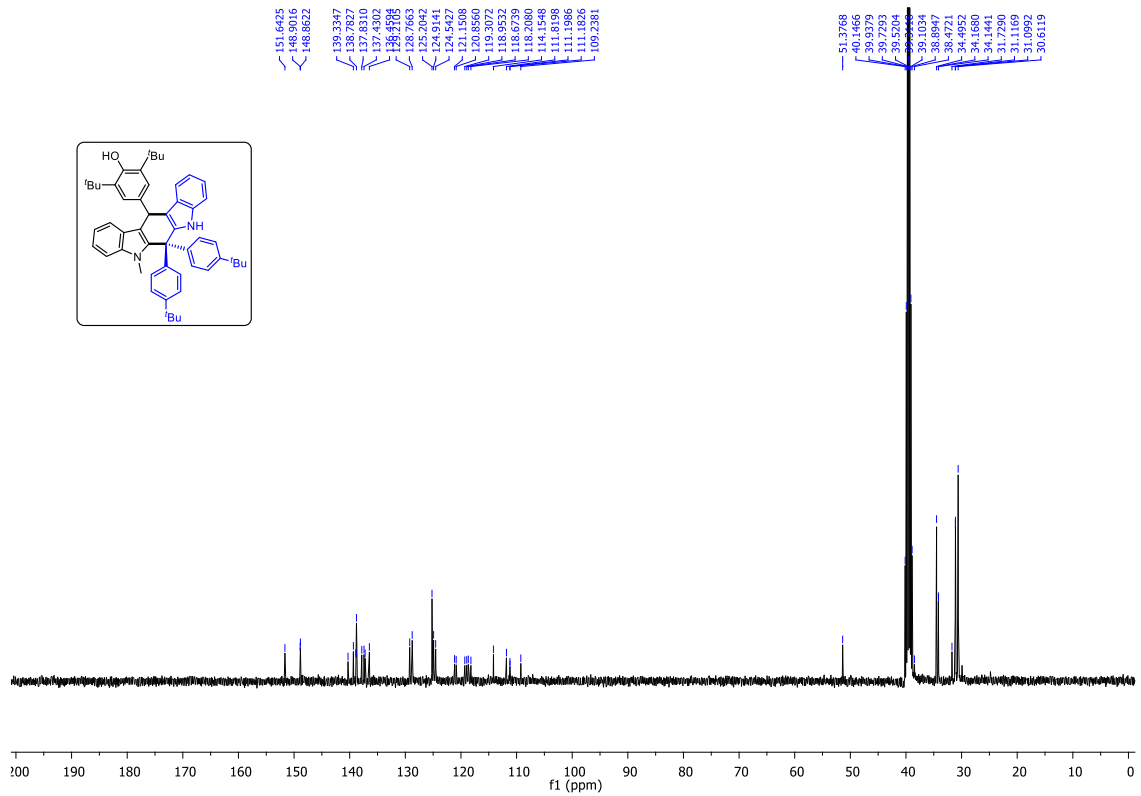



### <sup>1</sup>H NMR (400 MHz, CDCl<sub>3</sub>) Spectrum of **3s**

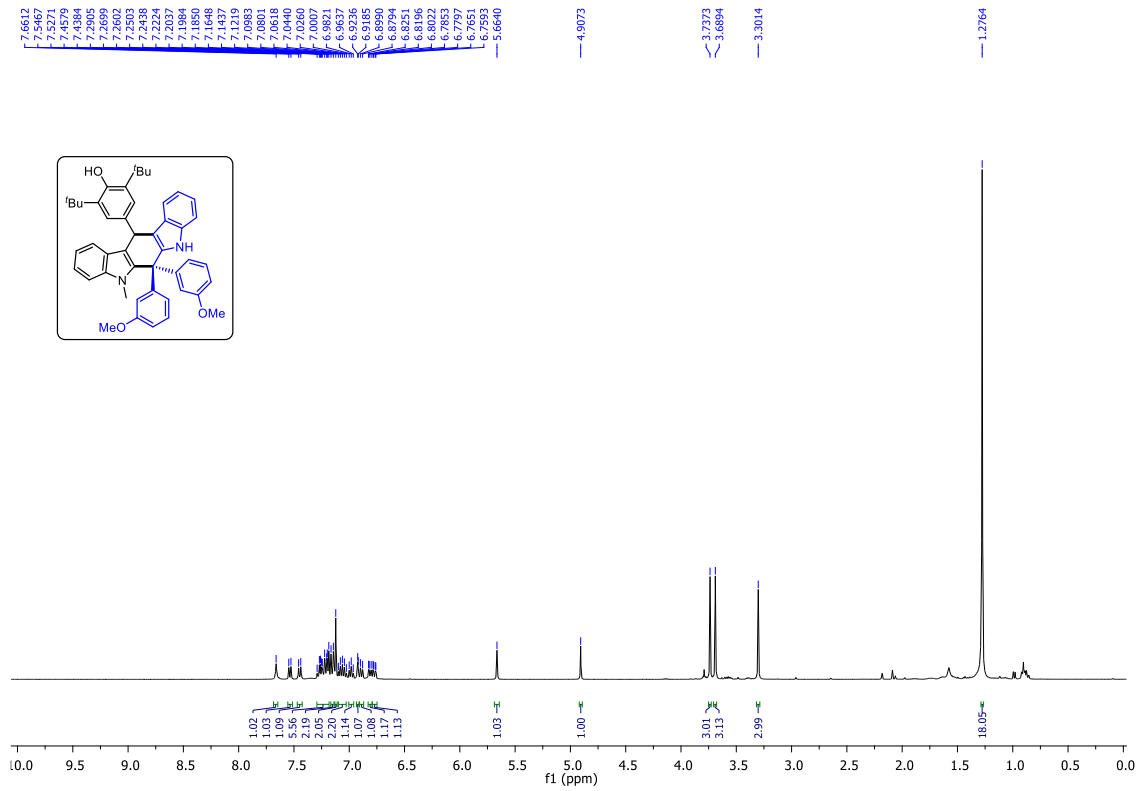

### <sup>13</sup>C {<sup>1</sup>H} NMR (100 MHz, CDCl<sub>3</sub>) Spectrum of **3s**

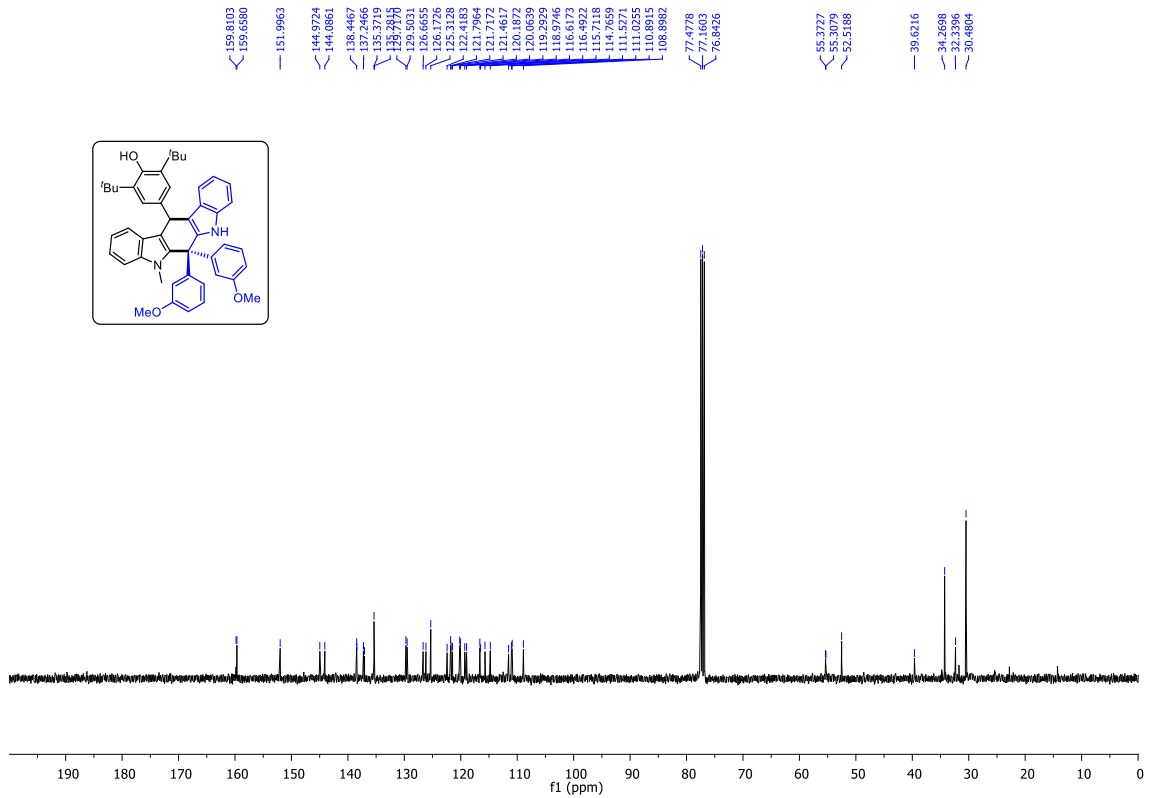

### <sup>1</sup>H NMR (400 MHz, CDCl<sub>3</sub>) Spectrum of **3t**

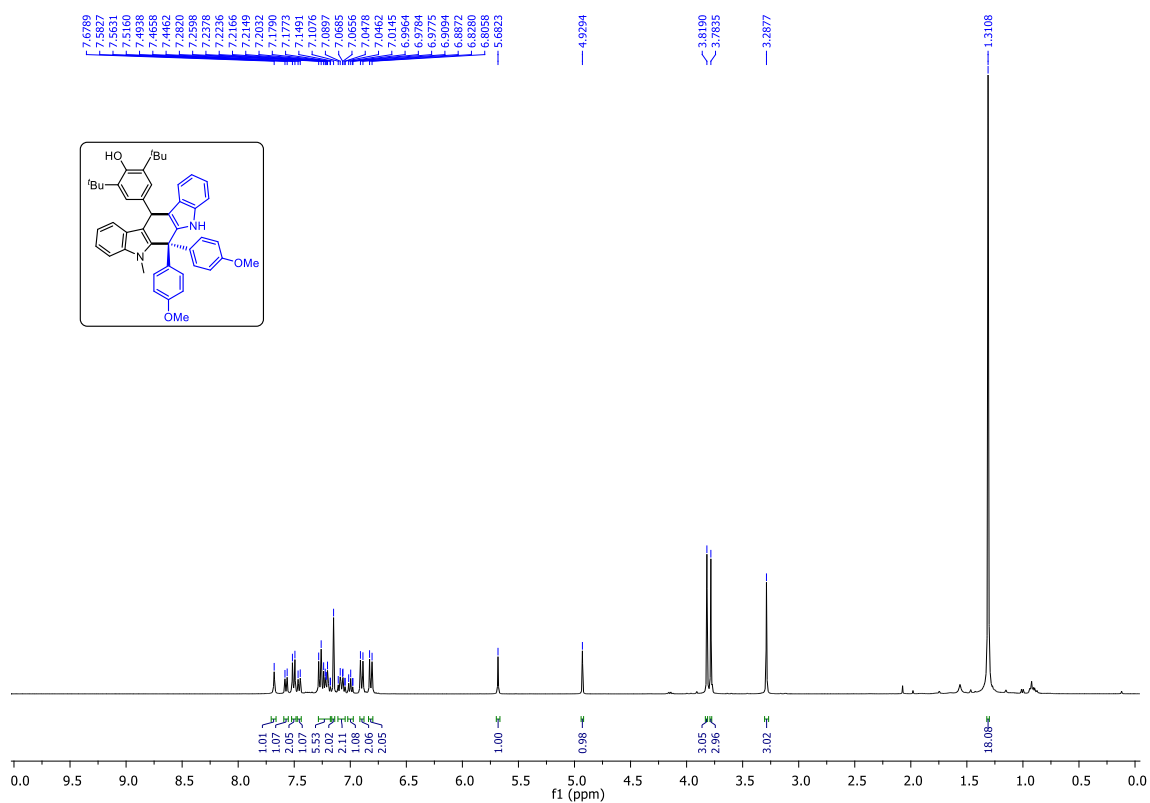

### <sup>13</sup>C {<sup>1</sup>H} NMR (100 MHz, CDCl<sub>3</sub>) Spectrum of **3t**

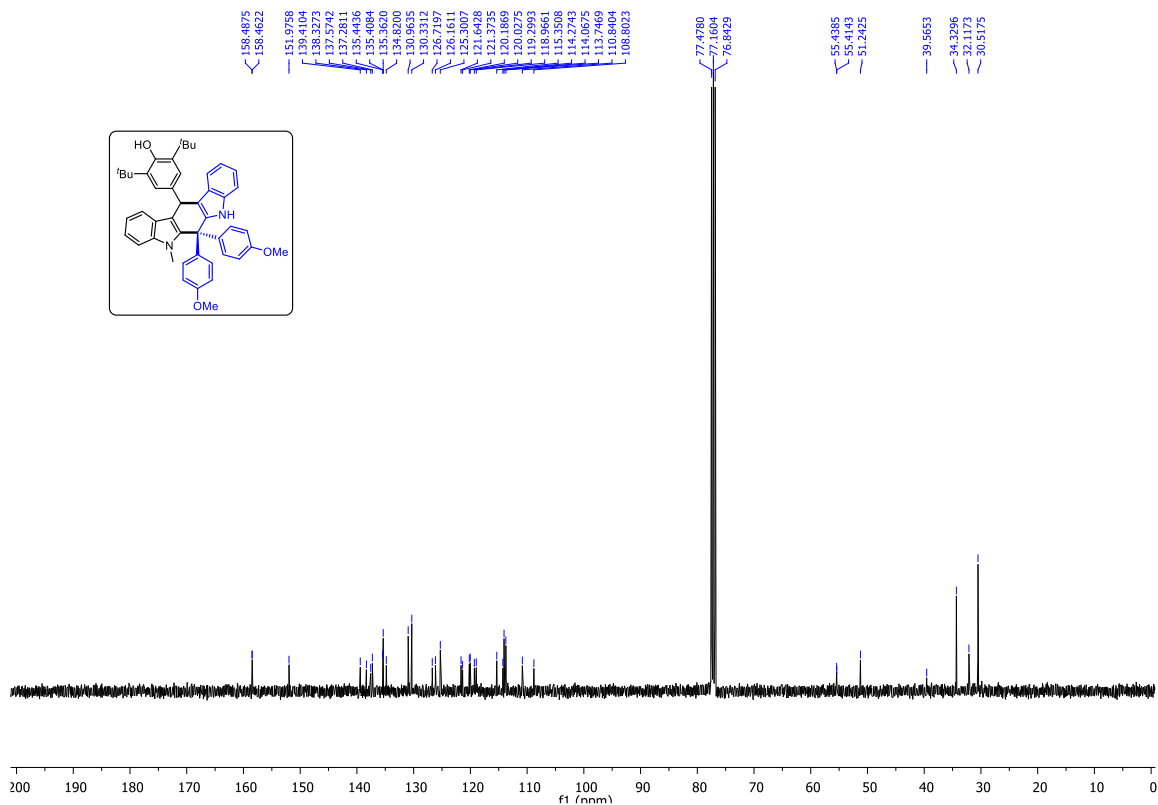

### <sup>1</sup>H NMR (400 MHz, DMSO-d<sub>6</sub>) Spectrum of **3u**

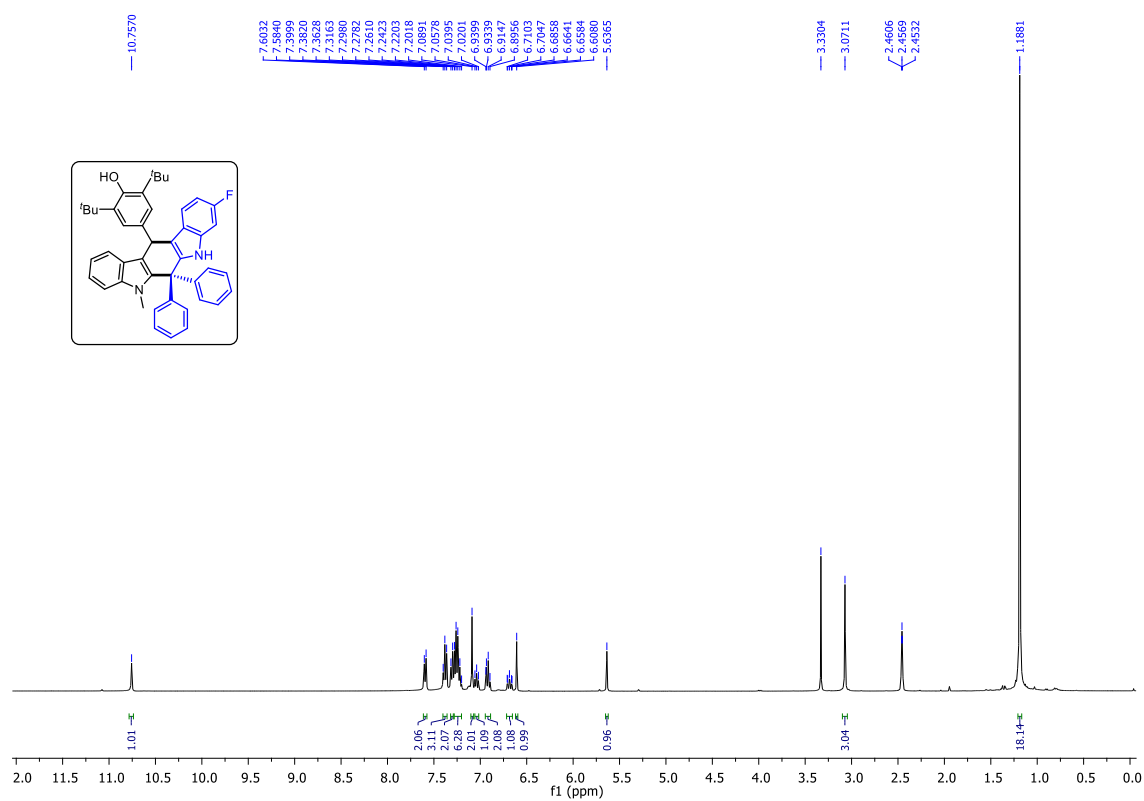

### <sup>13</sup>C {<sup>1</sup>H} NMR (100 MHz, DMSO-d<sub>6</sub>) Spectrum of **3u**

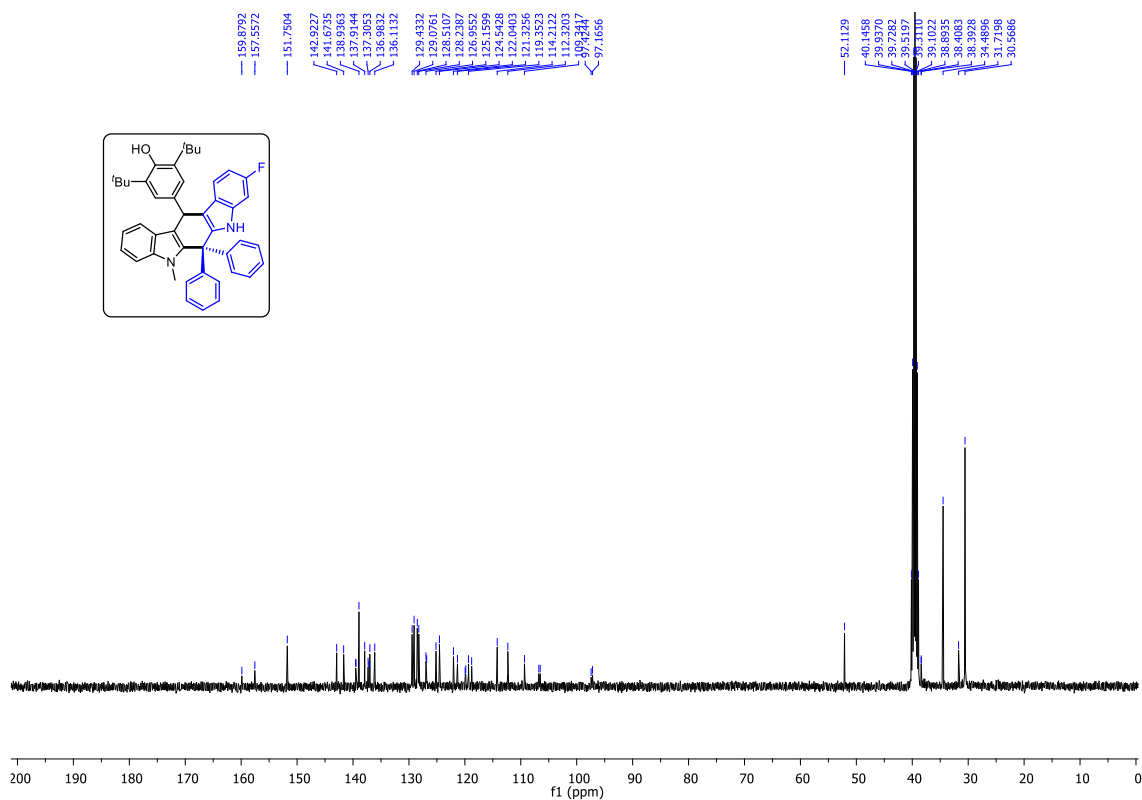

$^{19}\text{F}$   $\{^1\text{H}\}$  NMR (376 MHz, DMSO- $d_6$ ) Spectrum of **3u**

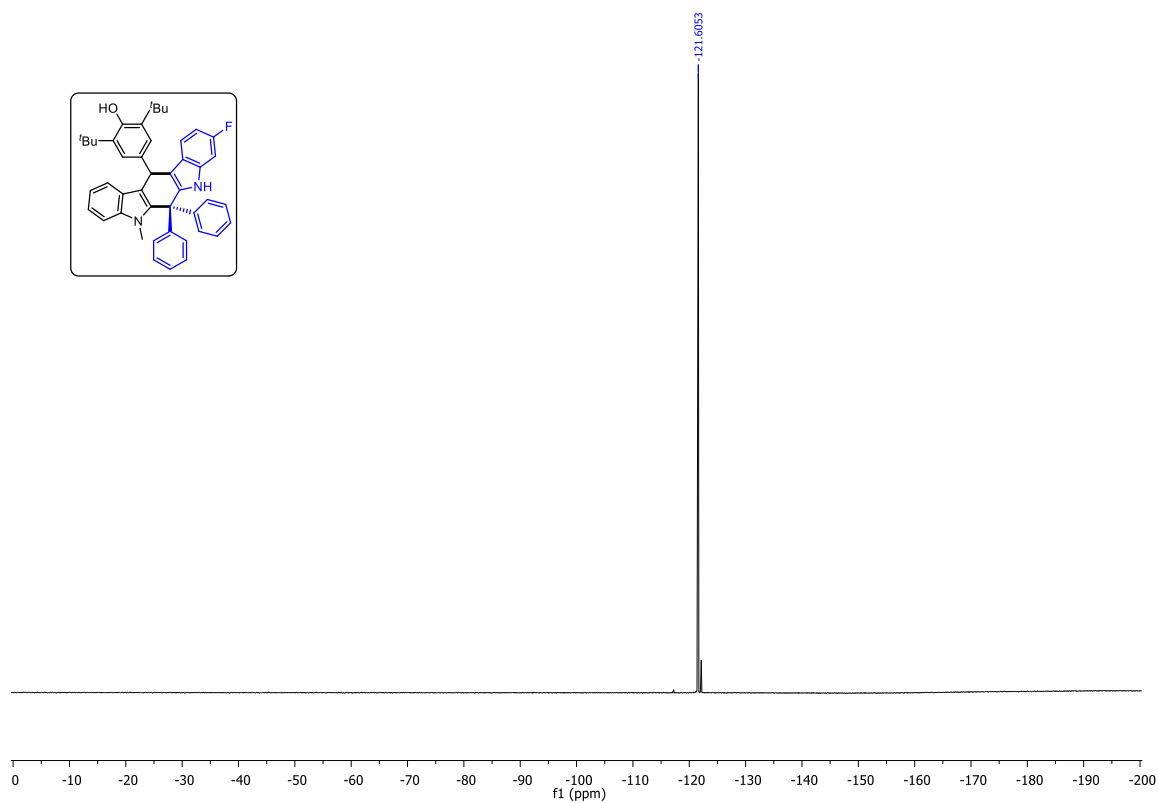

$^1\text{H}$  NMR (400 MHz, DMSO- $d_6$ ) Spectrum of **3v**

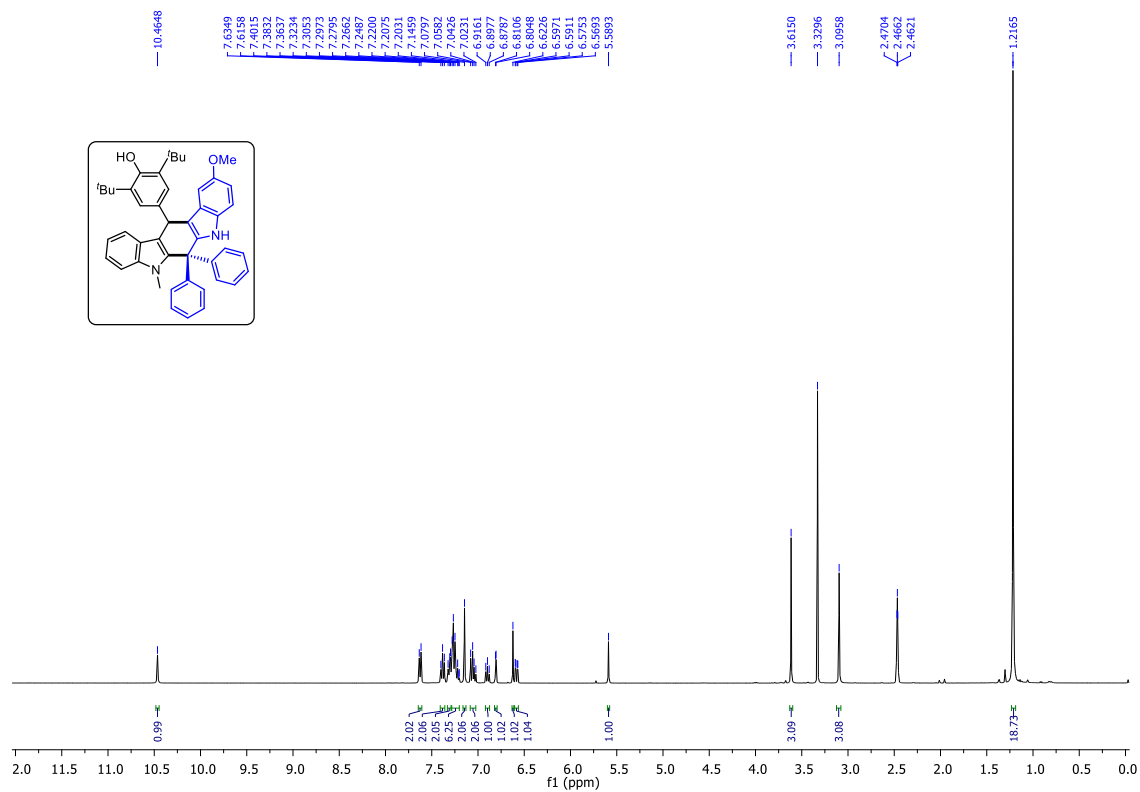

$^{13}\text{C}$   $\{^1\text{H}\}$  NMR (100 MHz, DMSO- $d_6$ ) Spectrum of **3v**

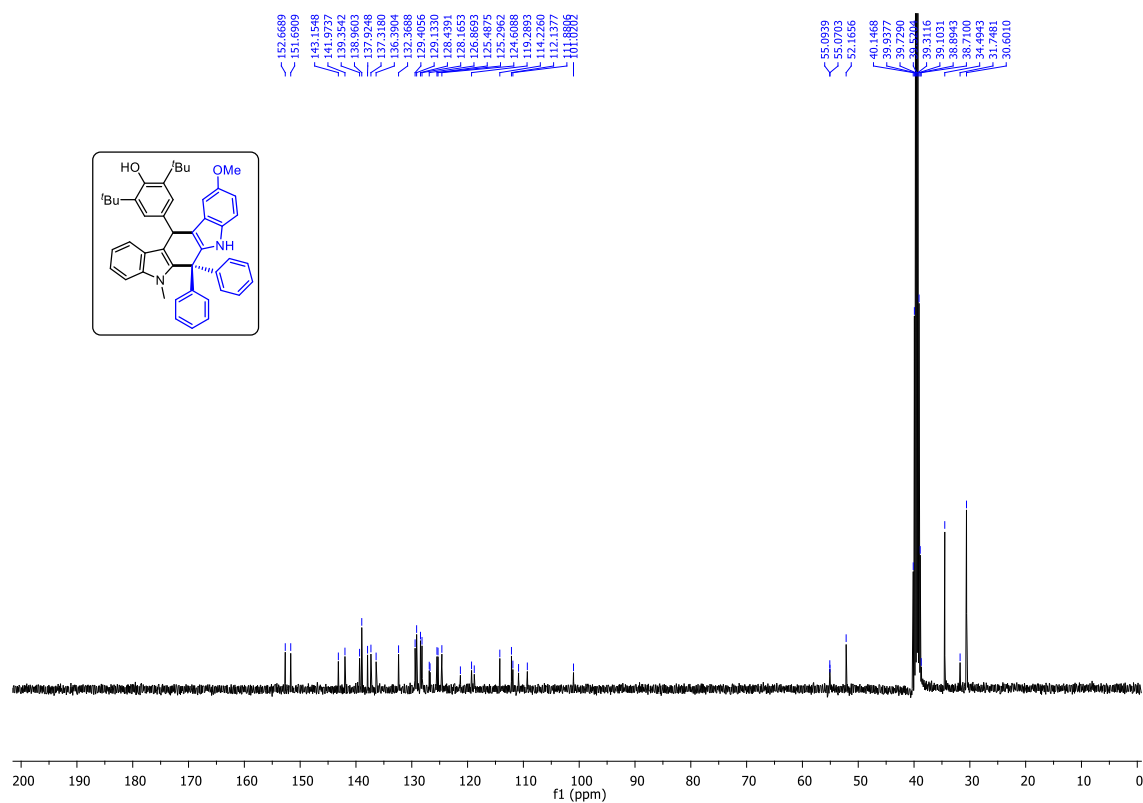

$^1\text{H}$  NMR (400 MHz,  $\text{CDCl}_3$ ) Spectrum of **3w**

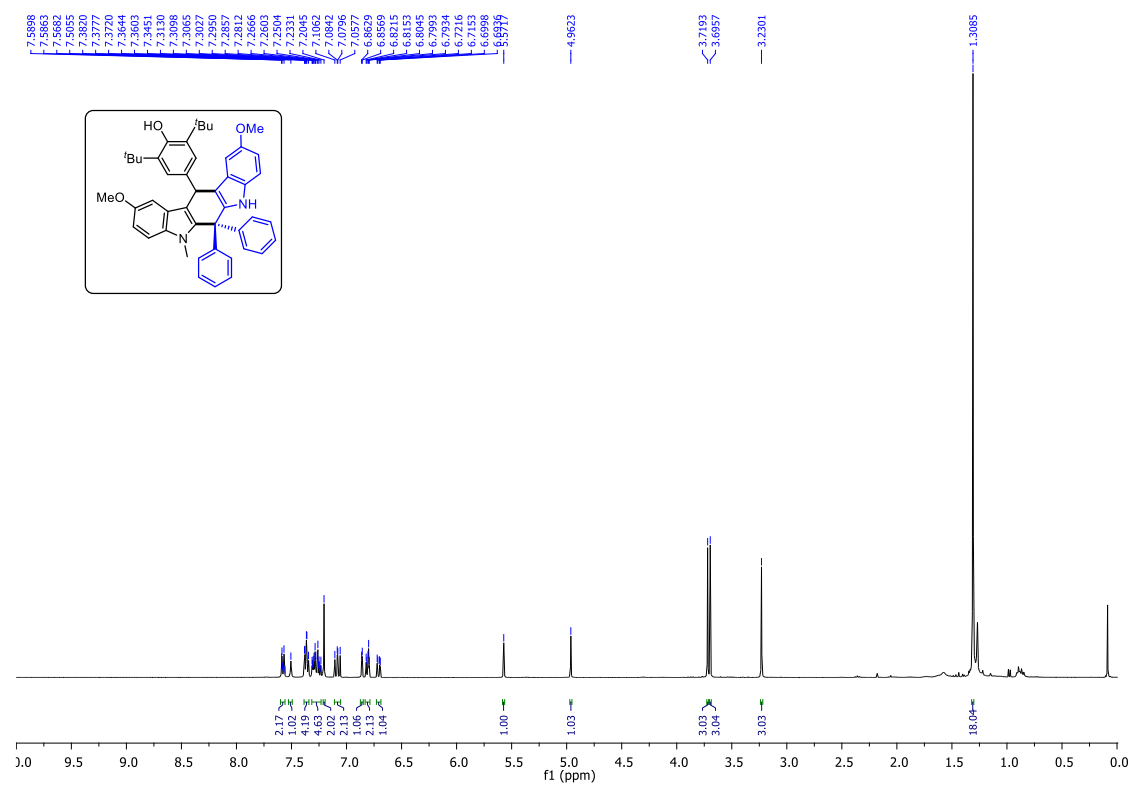

### $^{13}\text{C}$ $\{^1\text{H}\}$ NMR (100 MHz, $\text{CDCl}_3$ ) Spectrum of **3w**

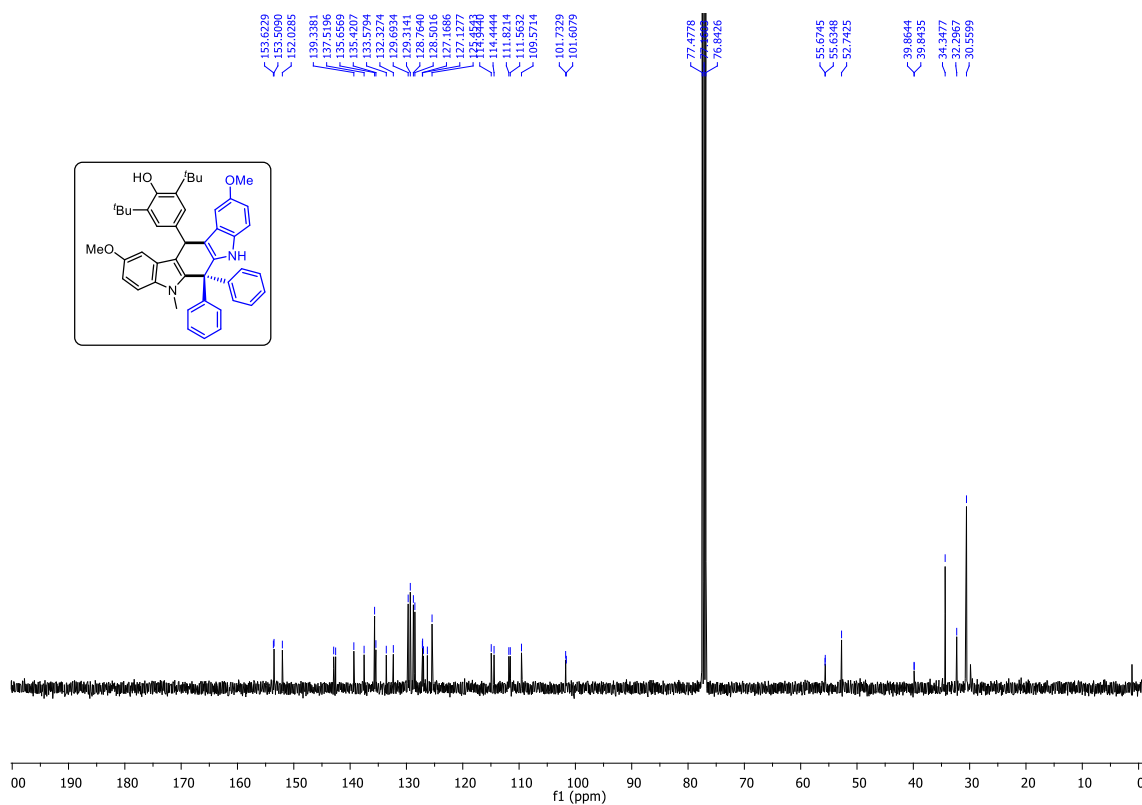

### $^1\text{H}$ NMR (400 MHz, $\text{CDCl}_3$ ) Spectrum of **3x**

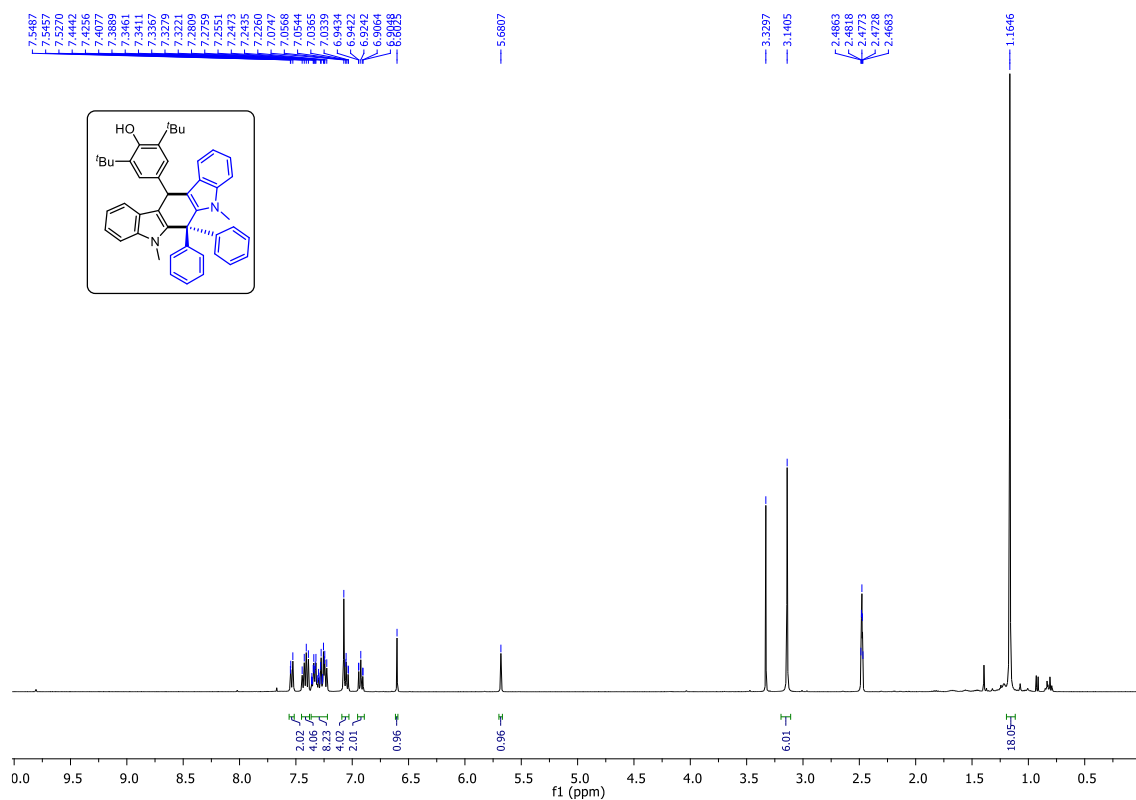

$^{13}\text{C}$   $\{^1\text{H}\}$  NMR (100 MHz,  $\text{CDCl}_3$ ) Spectrum of **3x**

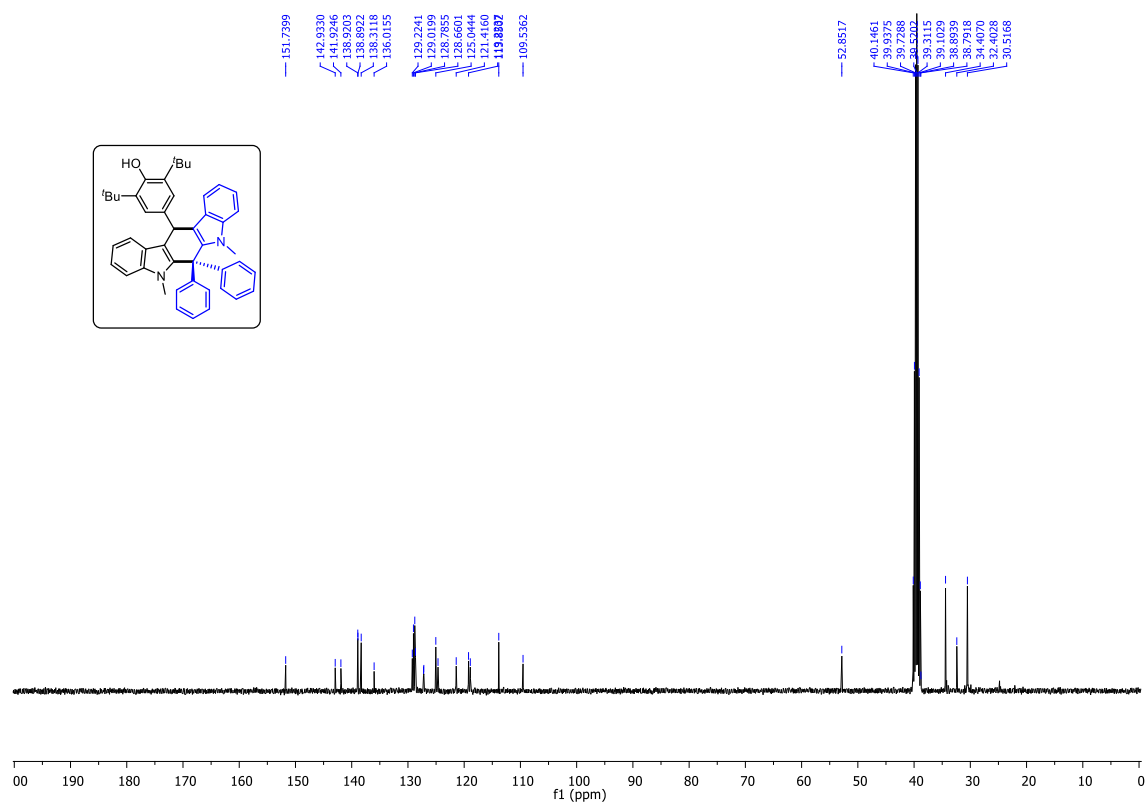

$^1\text{H}$  NMR (400 MHz,  $\text{CDCl}_3$ ) Spectrum of **3y**

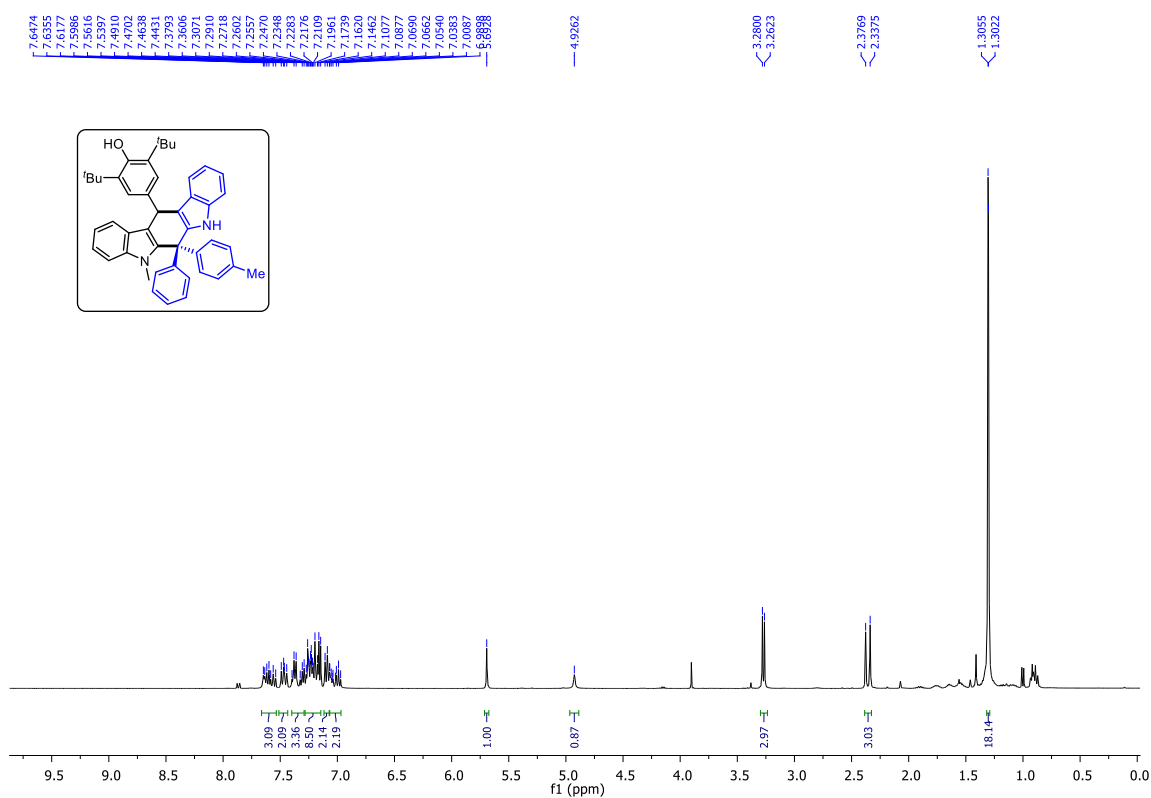

### $^{13}\text{C}$ $\{^1\text{H}\}$ NMR (100 MHz, $\text{CDCl}_3$ ) Spectrum of **3y**

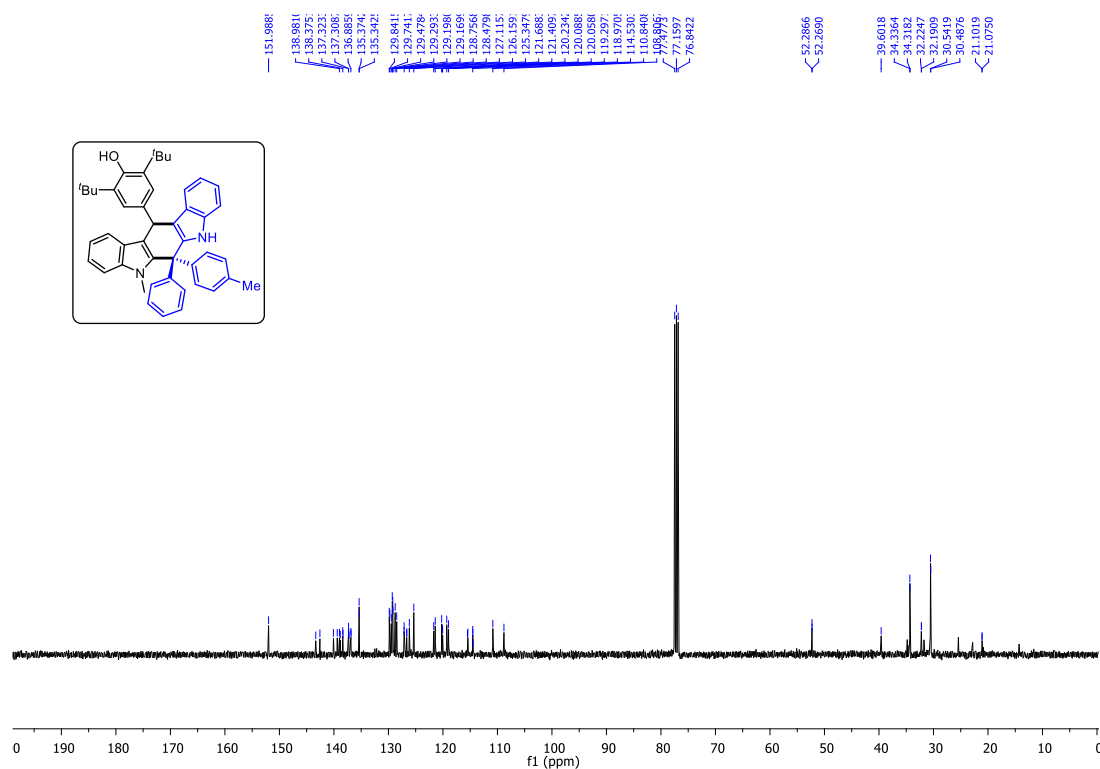

### $^1\text{H}$ NMR (400 MHz, $\text{DMSO-d}_6$ ) Spectrum of **5a**

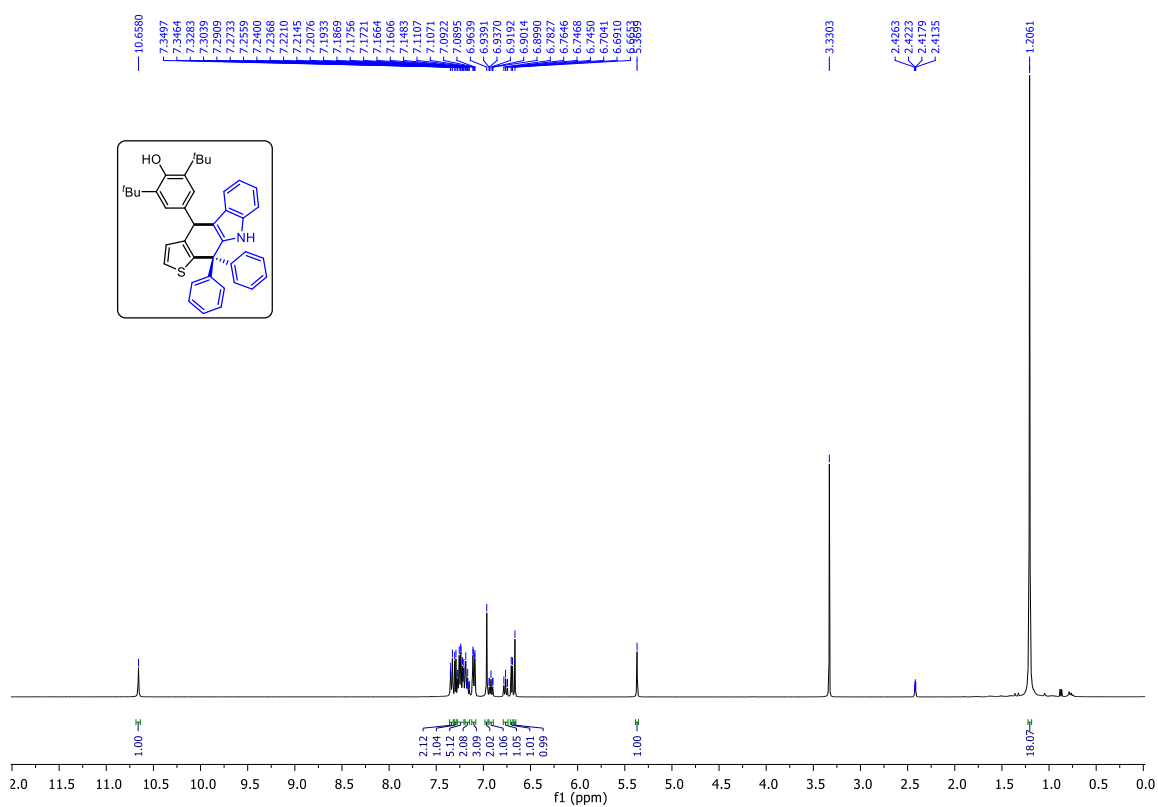



$^{13}\text{C}$   $\{^1\text{H}\}$  NMR (100 MHz, DMSO- $d_6$ ) Spectrum of **5a**

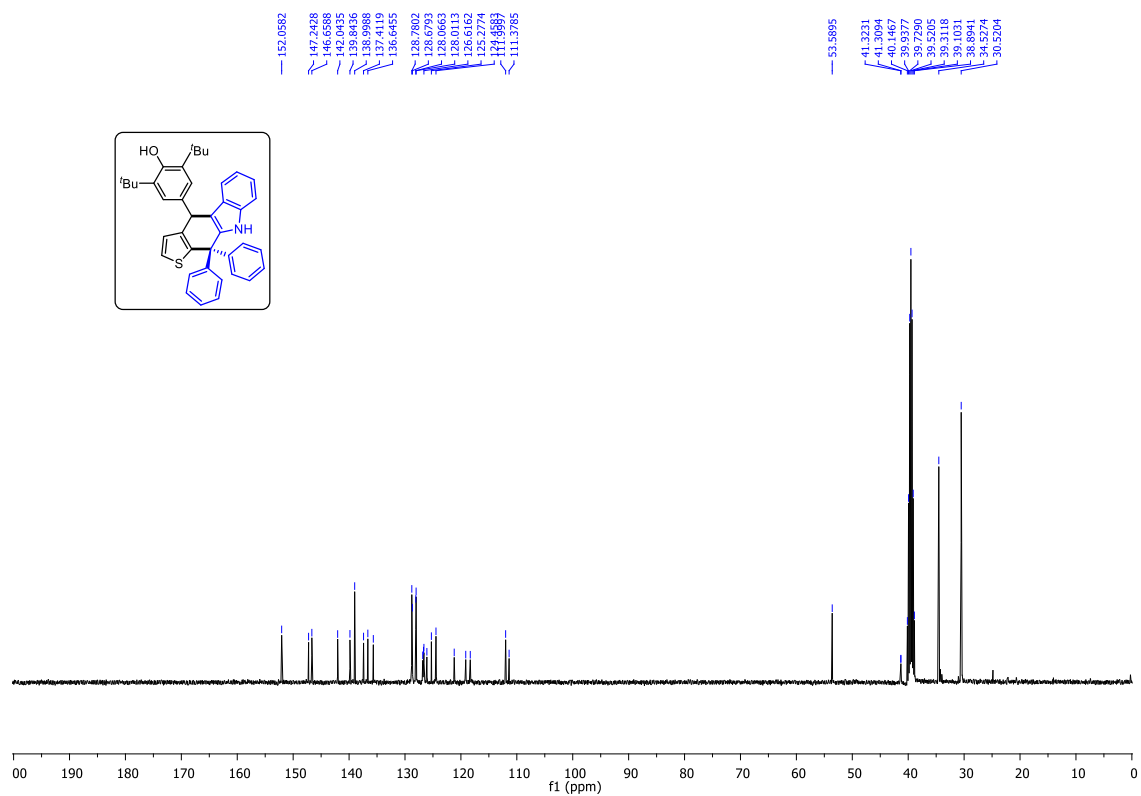

$^1\text{H}$  NMR (400 MHz, DMSO- $d_6$ ) Spectrum of **5b**

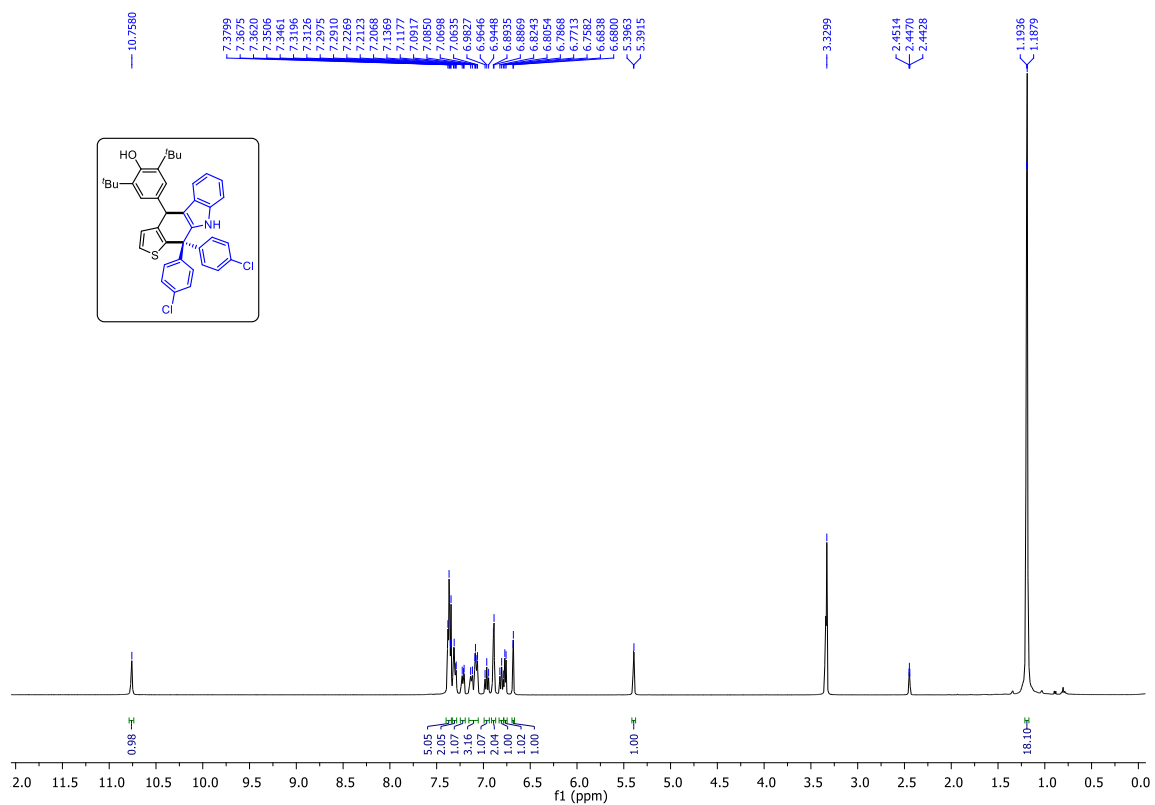

### $^{13}\text{C}$ $\{^1\text{H}\}$ NMR (100 MHz, DMSO- $d_6$ ) Spectrum of **5b**

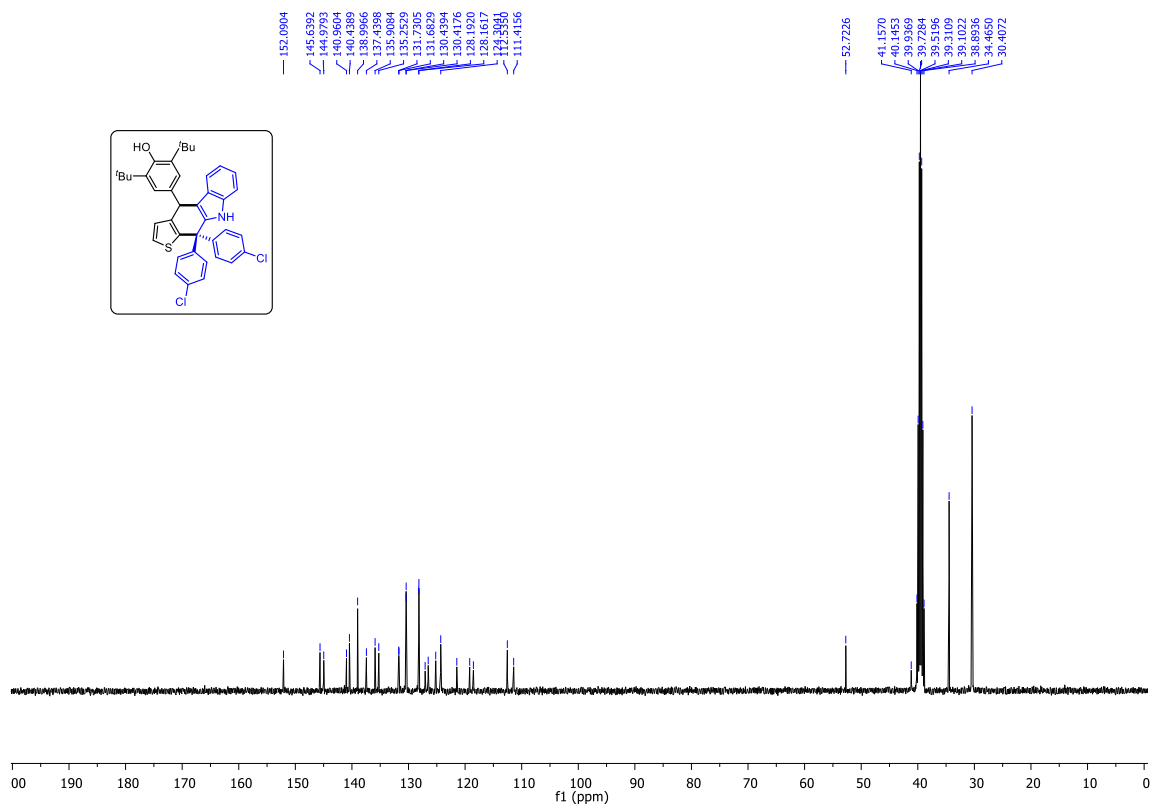

### $^1\text{H}$ NMR (400 MHz, DMSO- $d_6$ ) Spectrum of **5c**

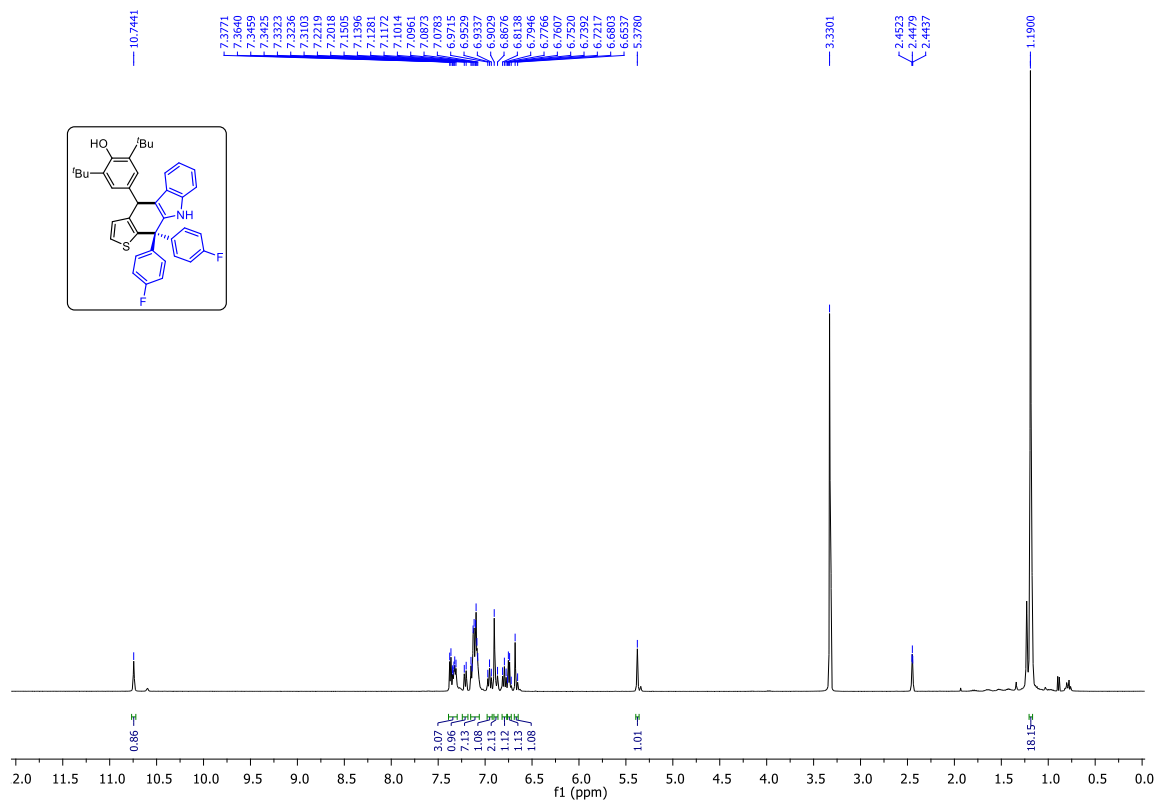

### $^{13}\text{C}$ $\{^1\text{H}\}$ NMR (100 MHz, DMSO- $d_6$ ) Spectrum of **5c**

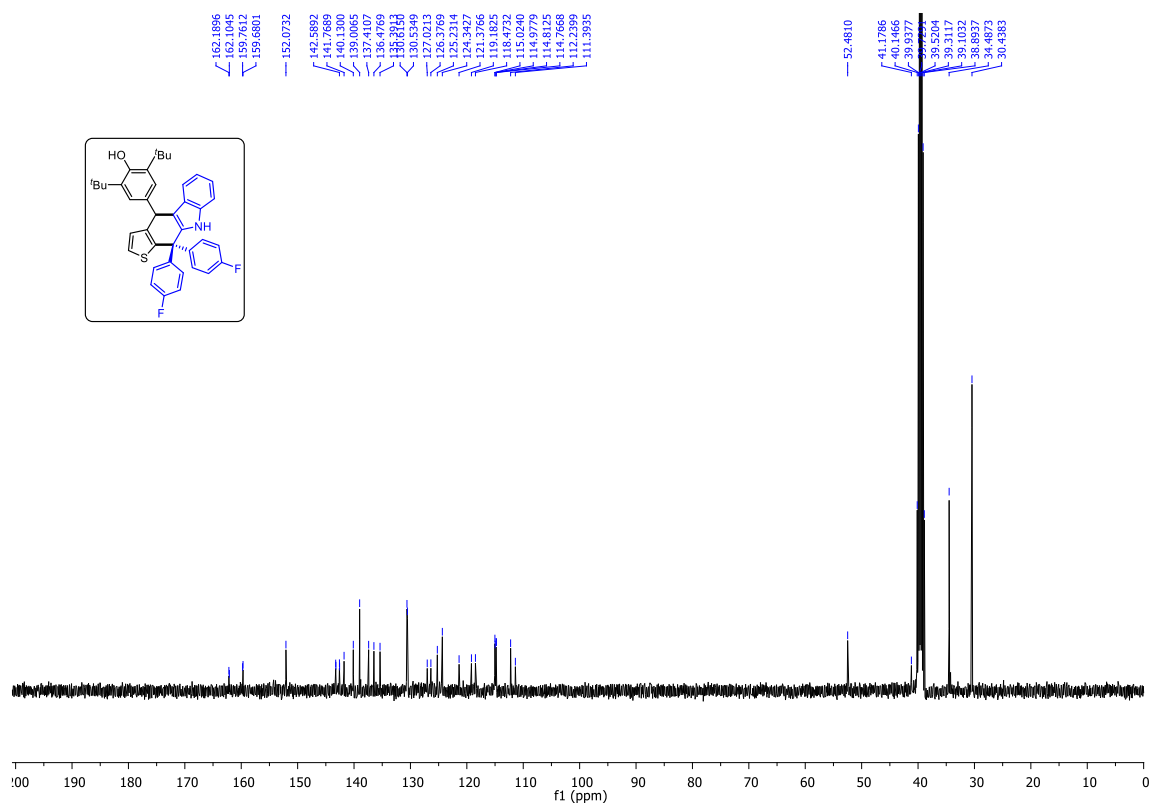

### $^{19}\text{F}$ $\{^1\text{H}\}$ NMR (376 MHz, DMSO- $d_6$ ) Spectrum of **5c**

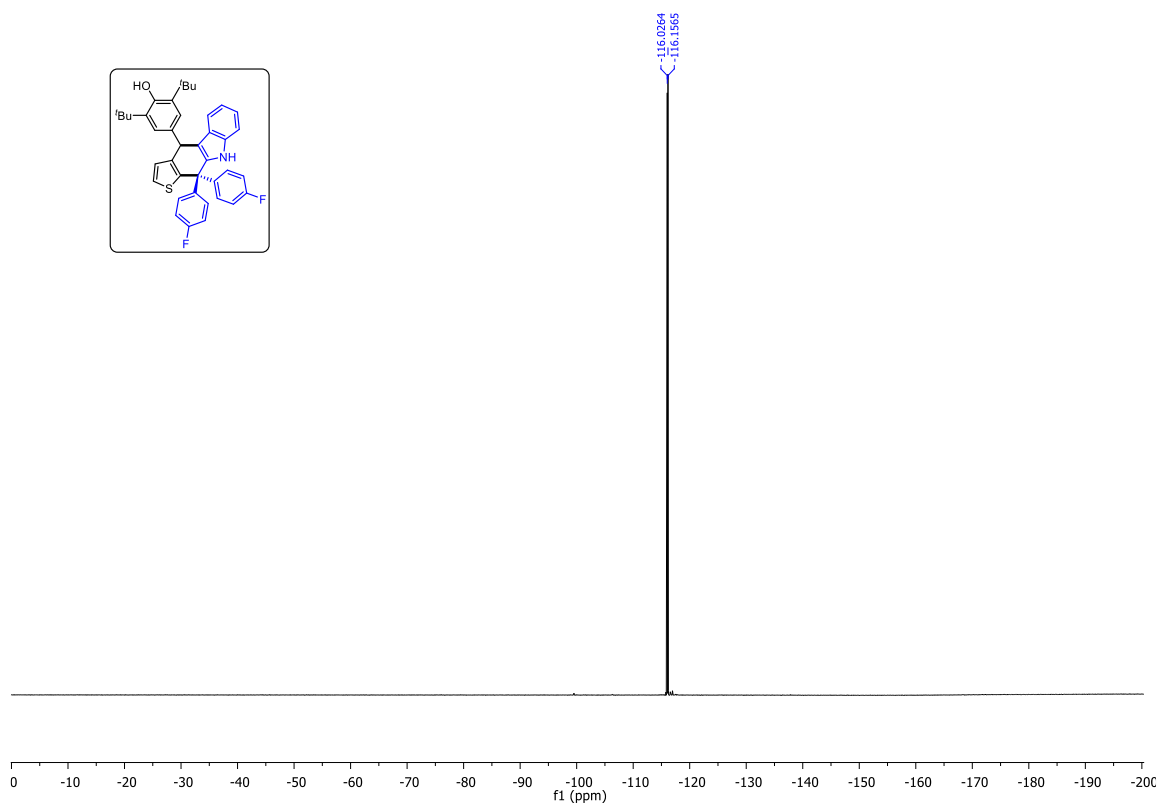

### <sup>1</sup>H NMR (400 MHz, DMSO-d<sub>6</sub>) Spectrum of **5d**

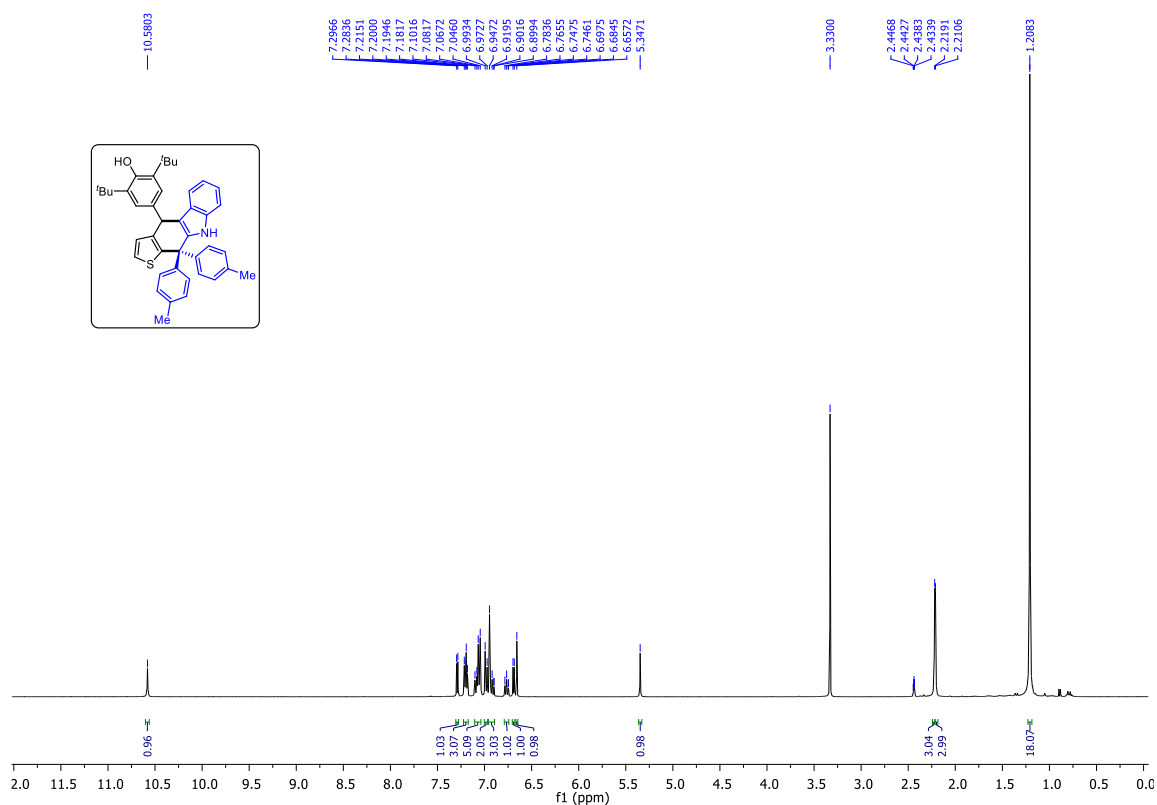

### <sup>13</sup>C {<sup>1</sup>H} NMR (100 MHz, DMSO-d<sub>6</sub>) Spectrum of **5d**

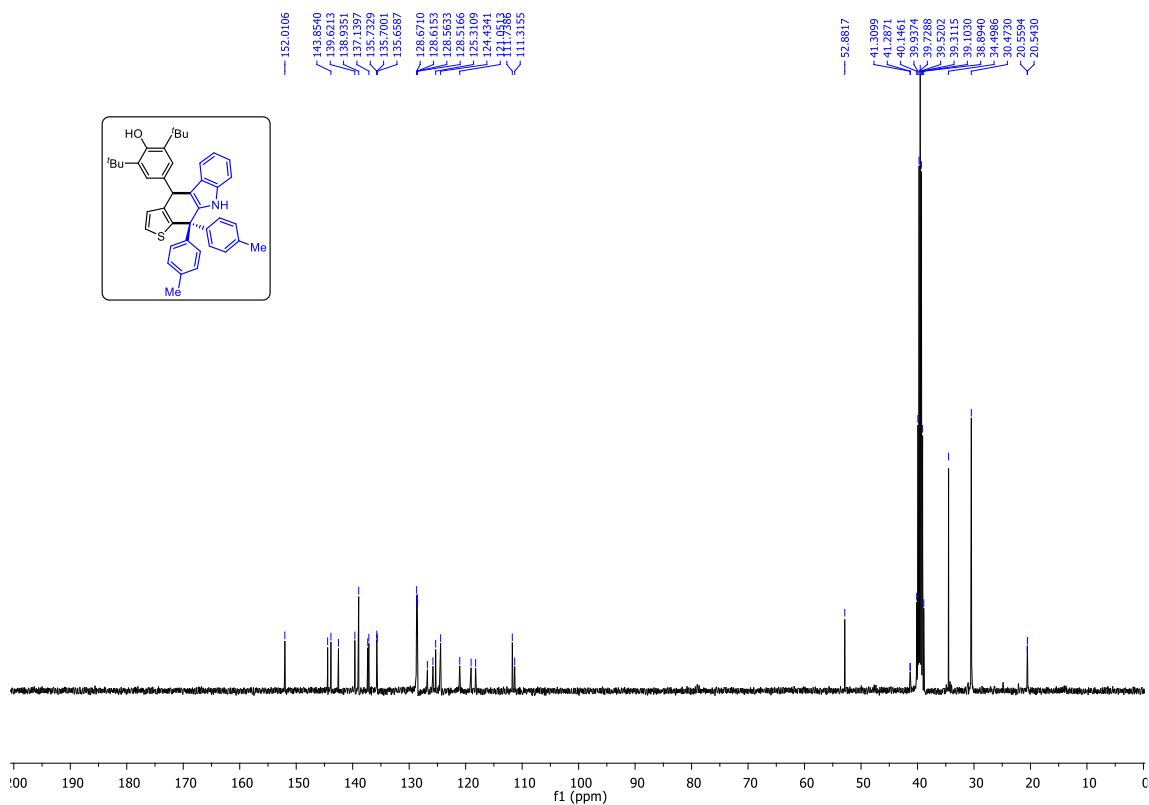

### <sup>1</sup>H NMR (400 MHz, DMSO-d<sub>6</sub>) Spectrum of **5e**

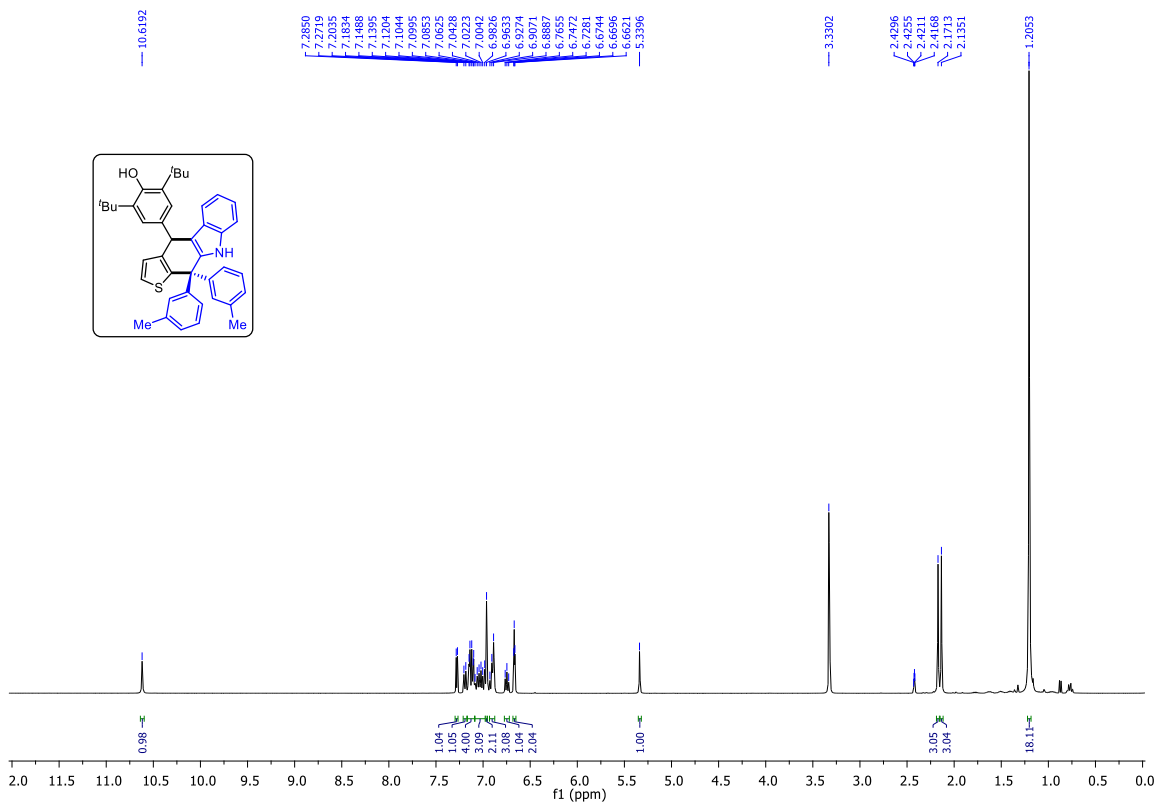

### <sup>13</sup>C {<sup>1</sup>H} NMR (100 MHz, DMSO-d<sub>6</sub>) Spectrum of **5e**

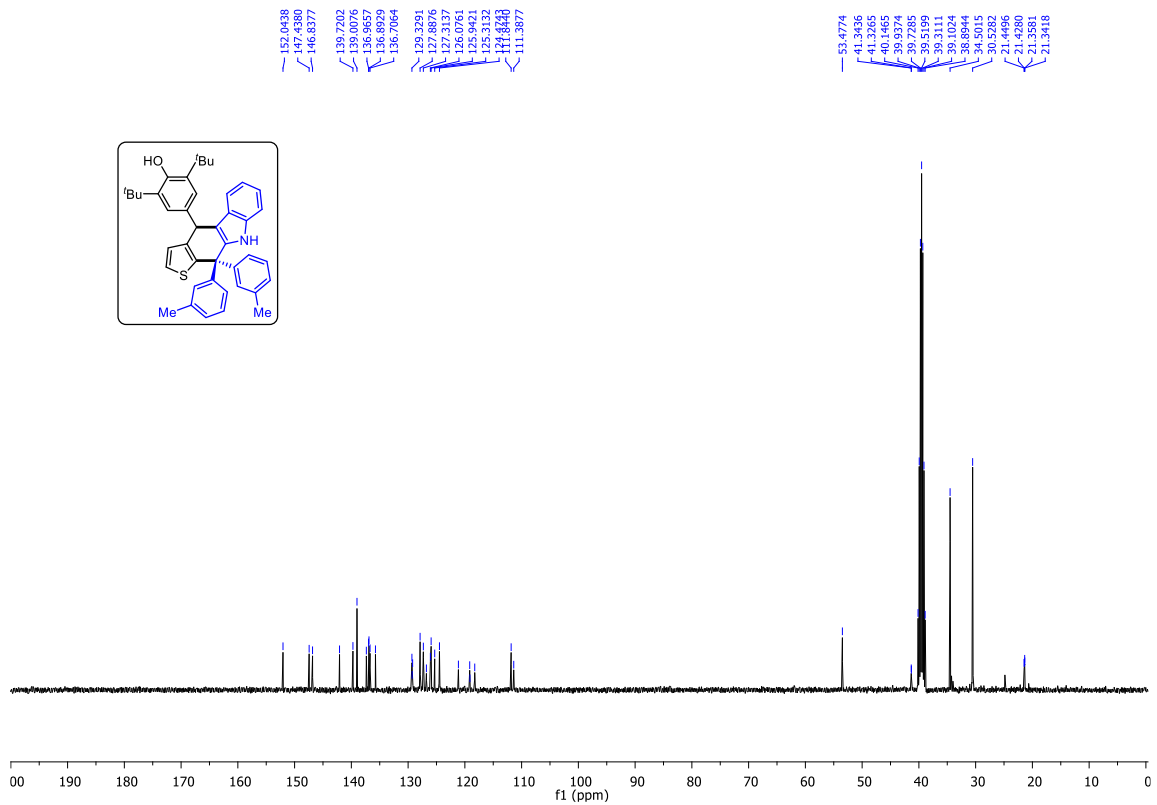

### $^1\text{H}$ NMR (400 MHz, DMSO- $d_6$ ) Spectrum of **5f**

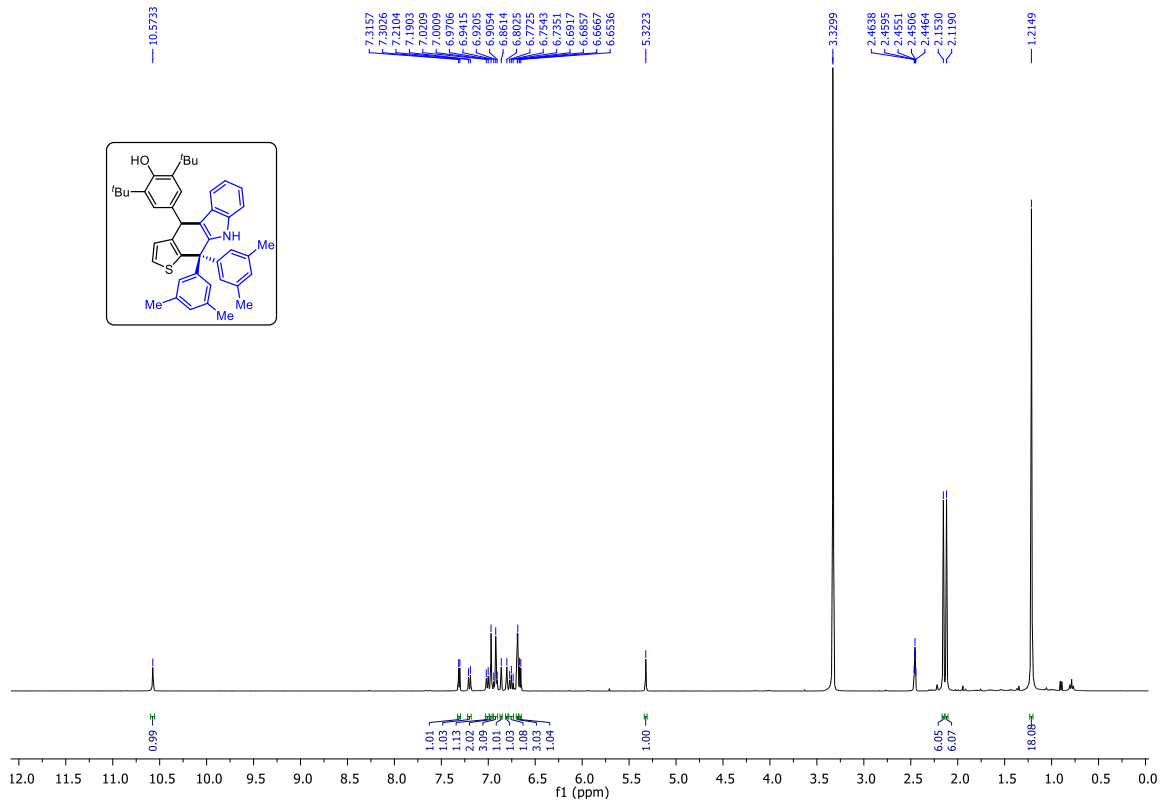

### $^{13}\text{C}$ { $^1\text{H}$ } NMR (100 MHz, DMSO- $d_6$ ) Spectrum of **5f**

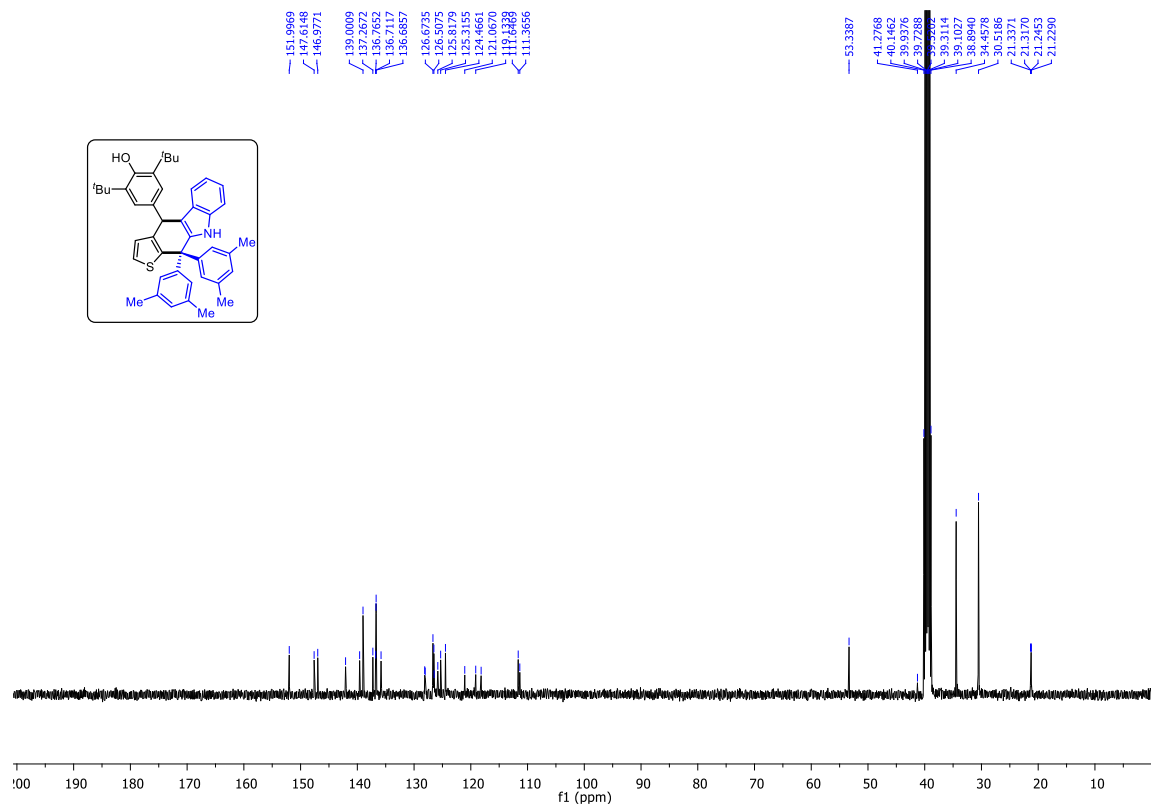

### <sup>1</sup>H NMR (400 MHz, DMSO-d<sub>6</sub>) Spectrum of **5g**

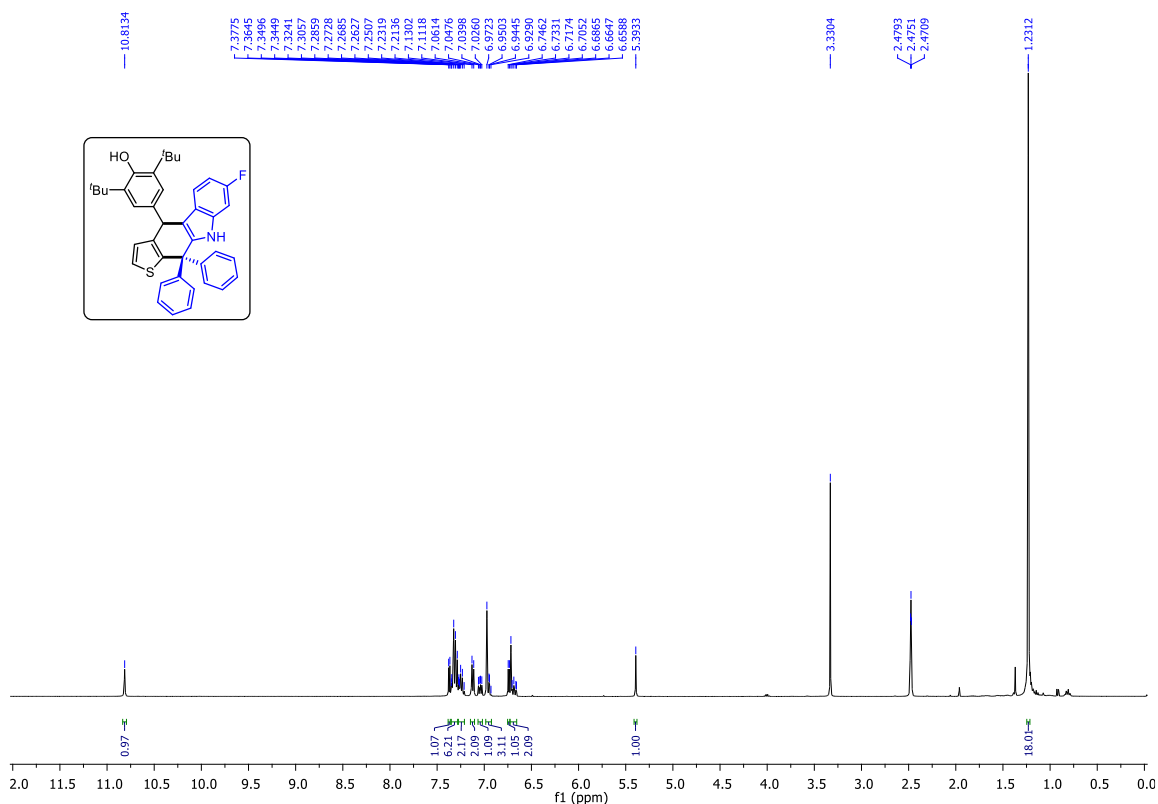

### <sup>13</sup>C {<sup>1</sup>H} NMR (100 MHz, DMSO-d<sub>6</sub>) Spectrum of **5g**

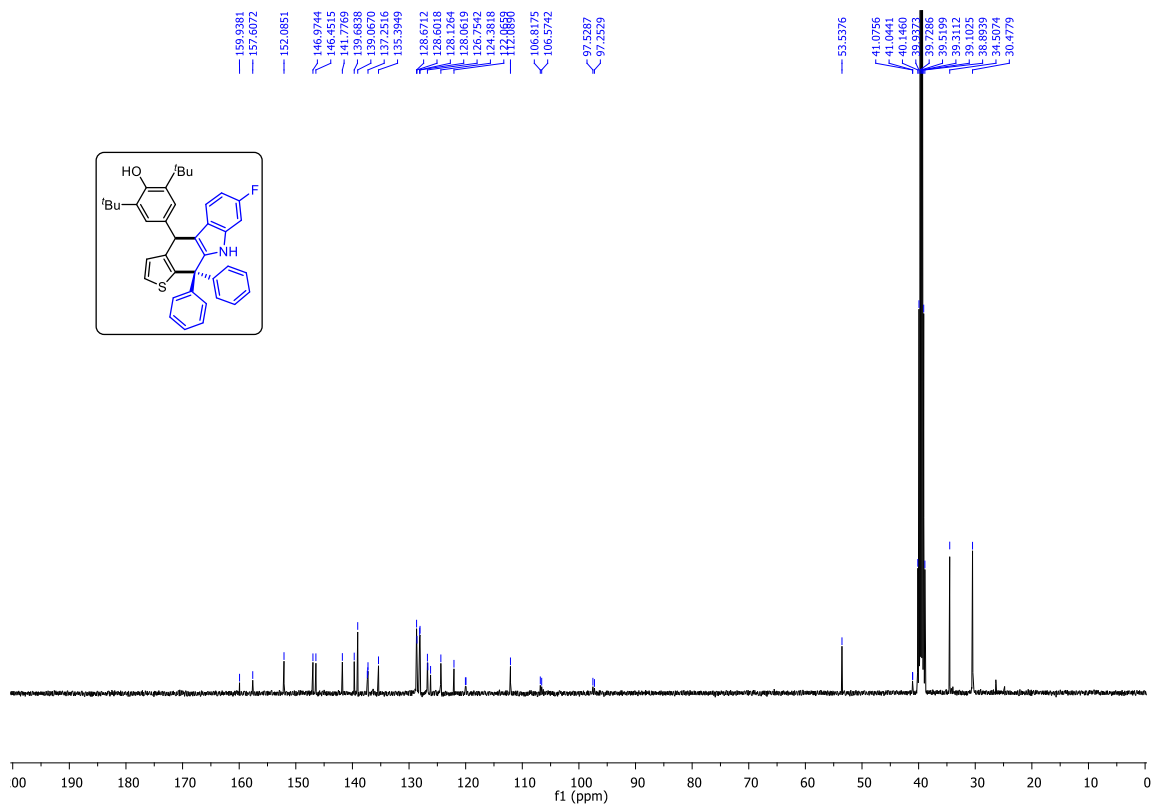

$^{19}\text{F}$   $\{^1\text{H}\}$  NMR (376 MHz, DMSO- $d_6$ ) Spectrum of **5g**

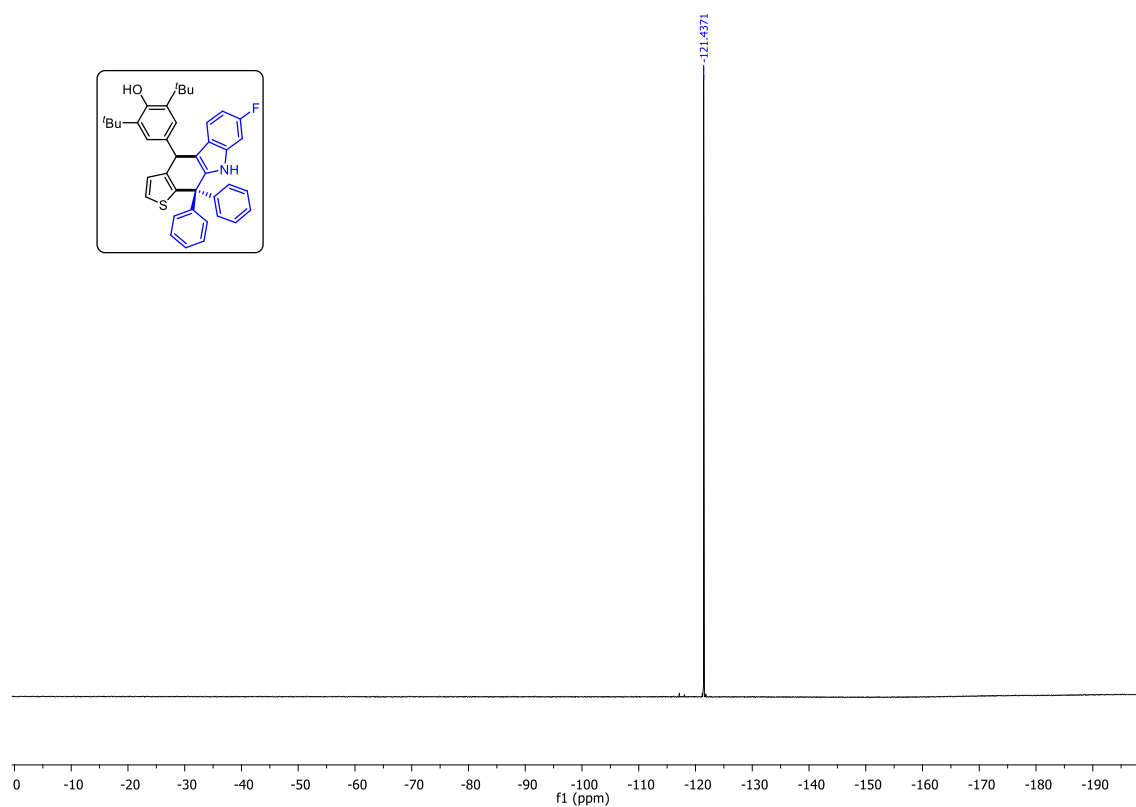

$^1\text{H}$  NMR (400 MHz, DMSO- $d_6$ ) Spectrum of **5h**

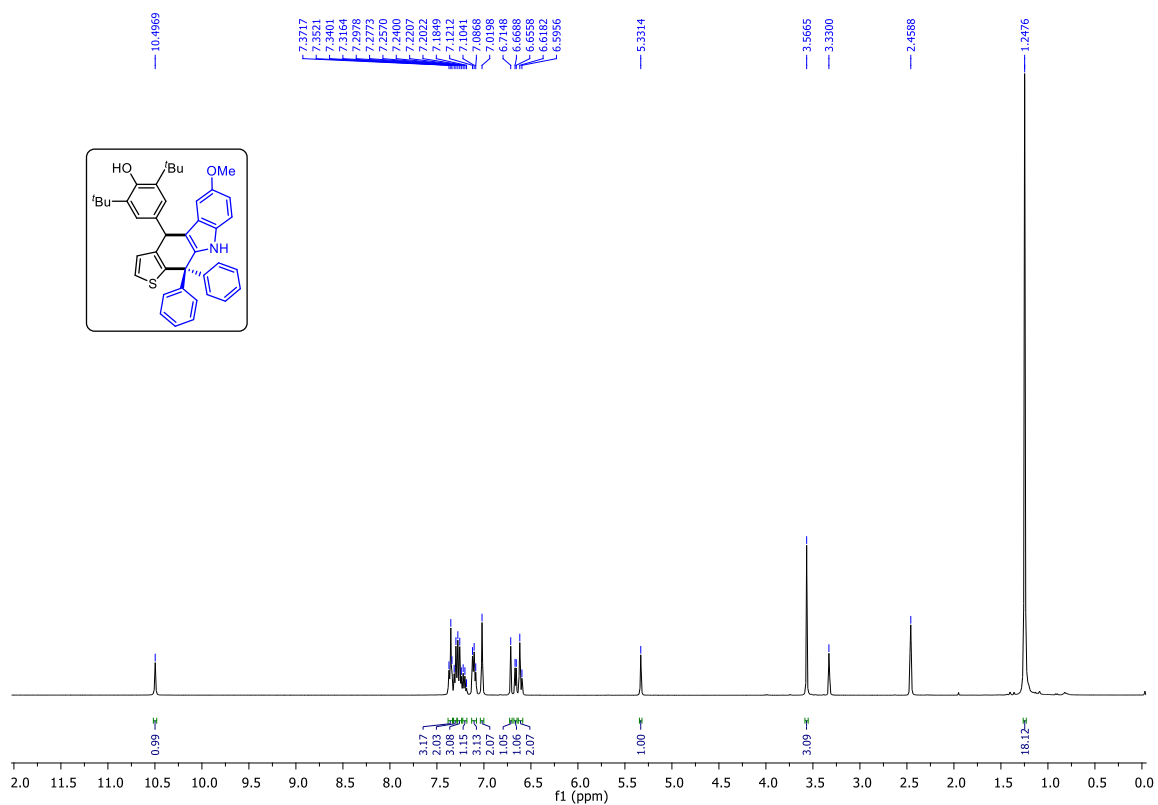



$^{13}\text{C}$   $\{^1\text{H}\}$  NMR (100 MHz, DMSO- $d_6$ ) Spectrum of **5h**

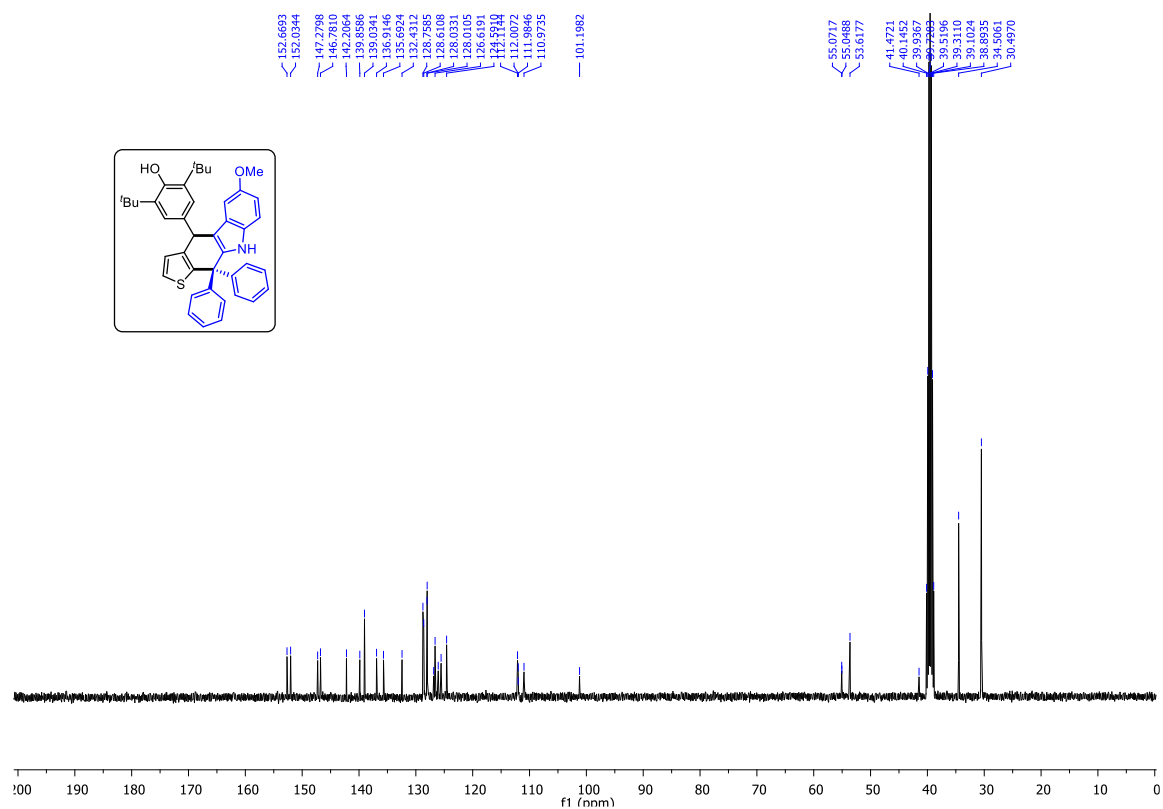

$^1\text{H}$  NMR (400 MHz,  $\text{CDCl}_3$ ) Spectrum of **5i**

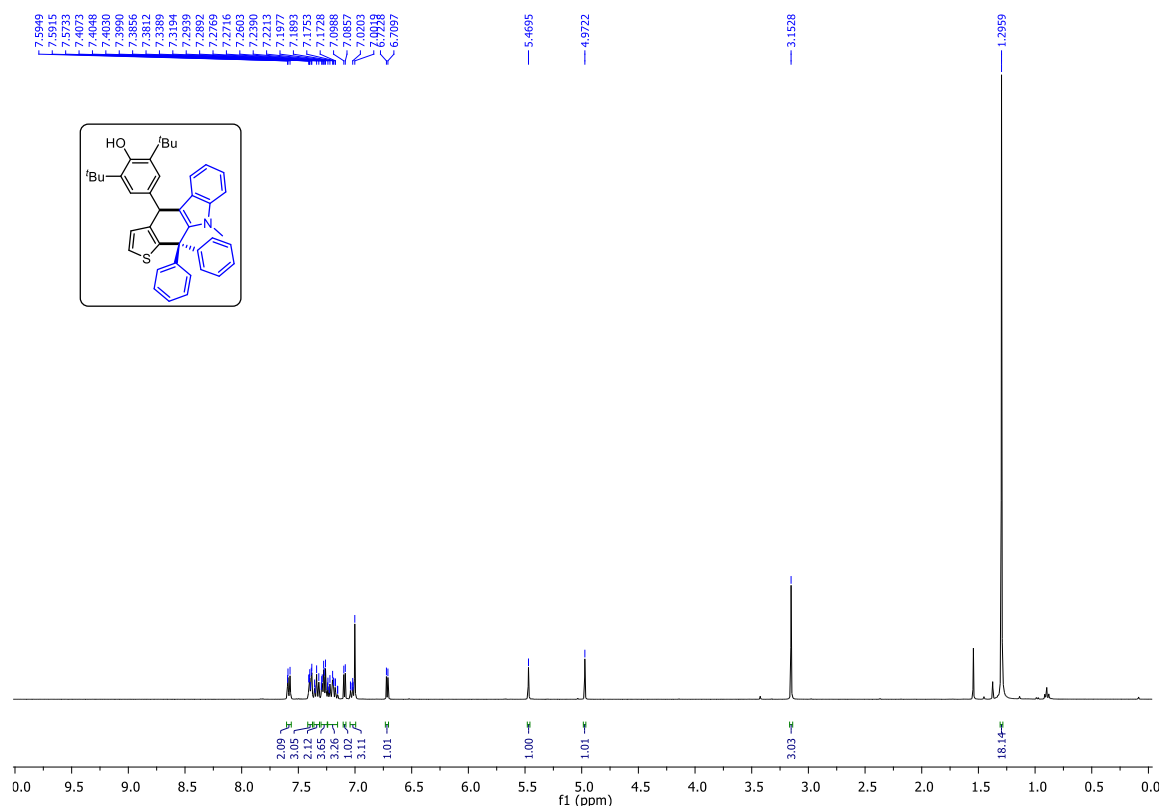

$^{13}\text{C}$   $\{^1\text{H}\}$  NMR (100 MHz,  $\text{CDCl}_3$ ) Spectrum of **5i**

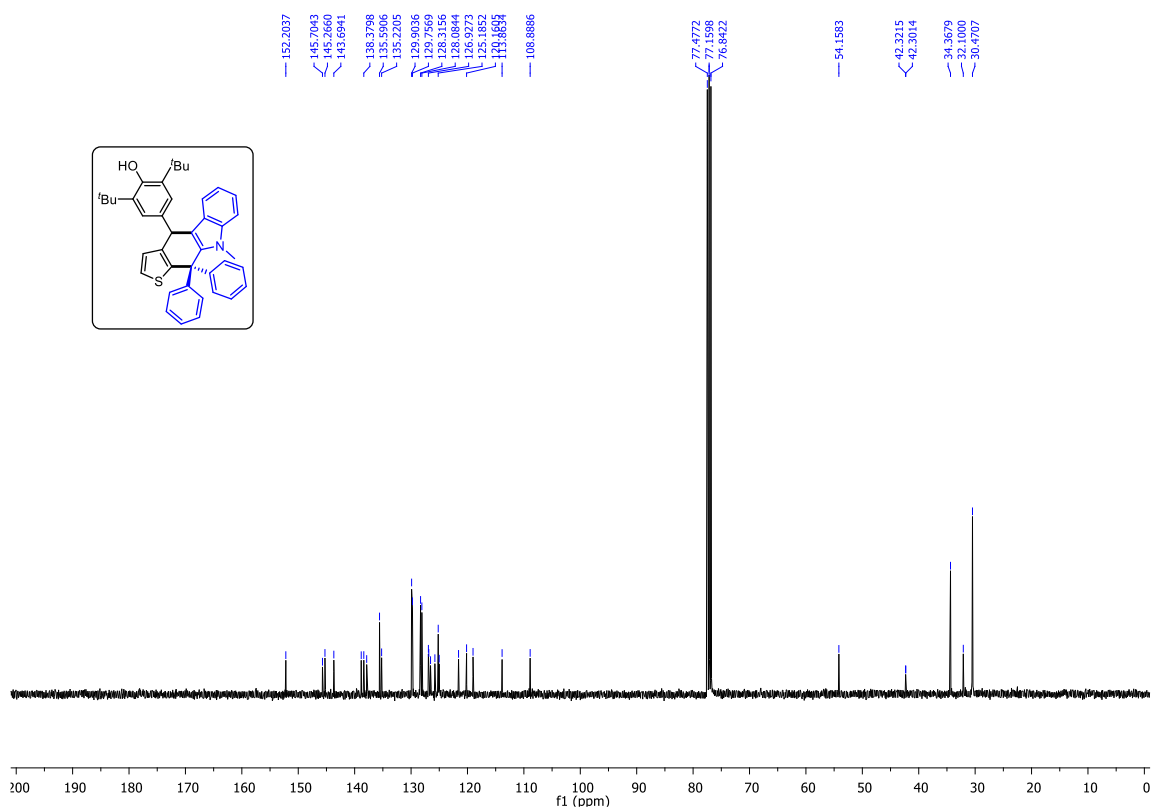

$^1\text{H}$  NMR (400 MHz,  $\text{CDCl}_3$ ) Spectrum of **5j**

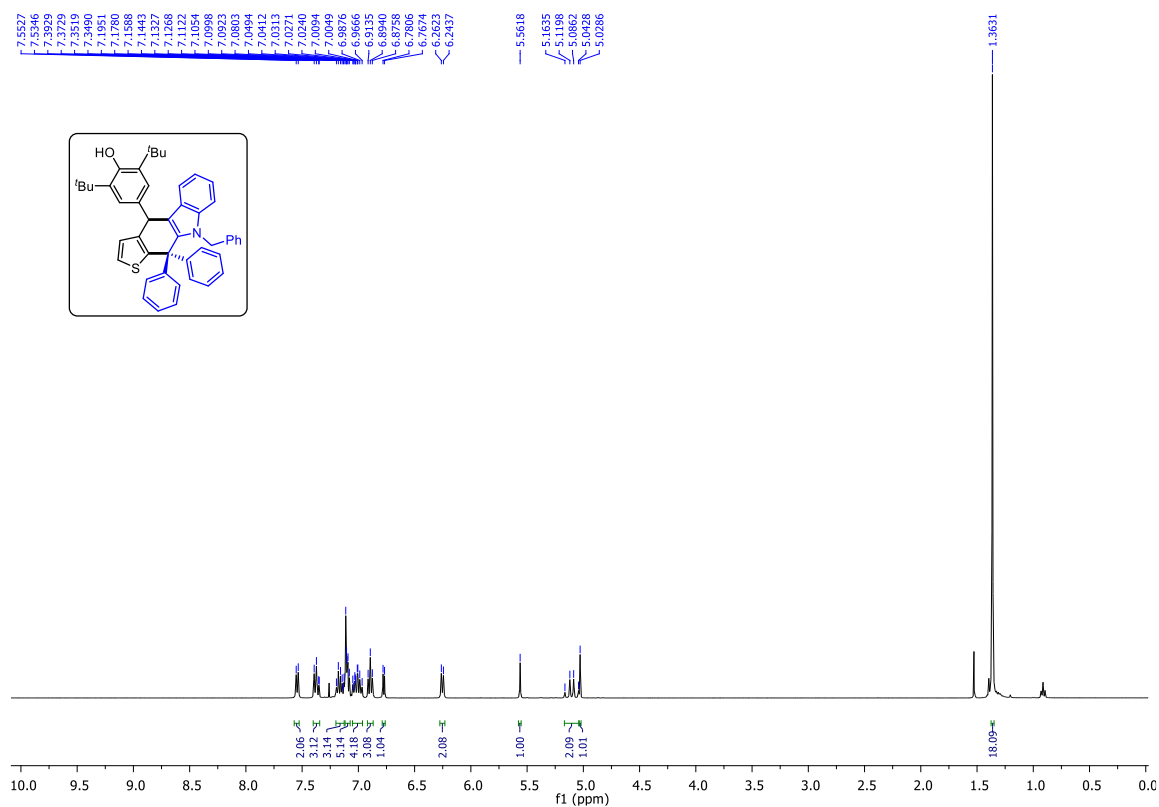

$^{13}\text{C}$   $\{^1\text{H}\}$  NMR (100 MHz,  $\text{CDCl}_3$ ) Spectrum of **5j**

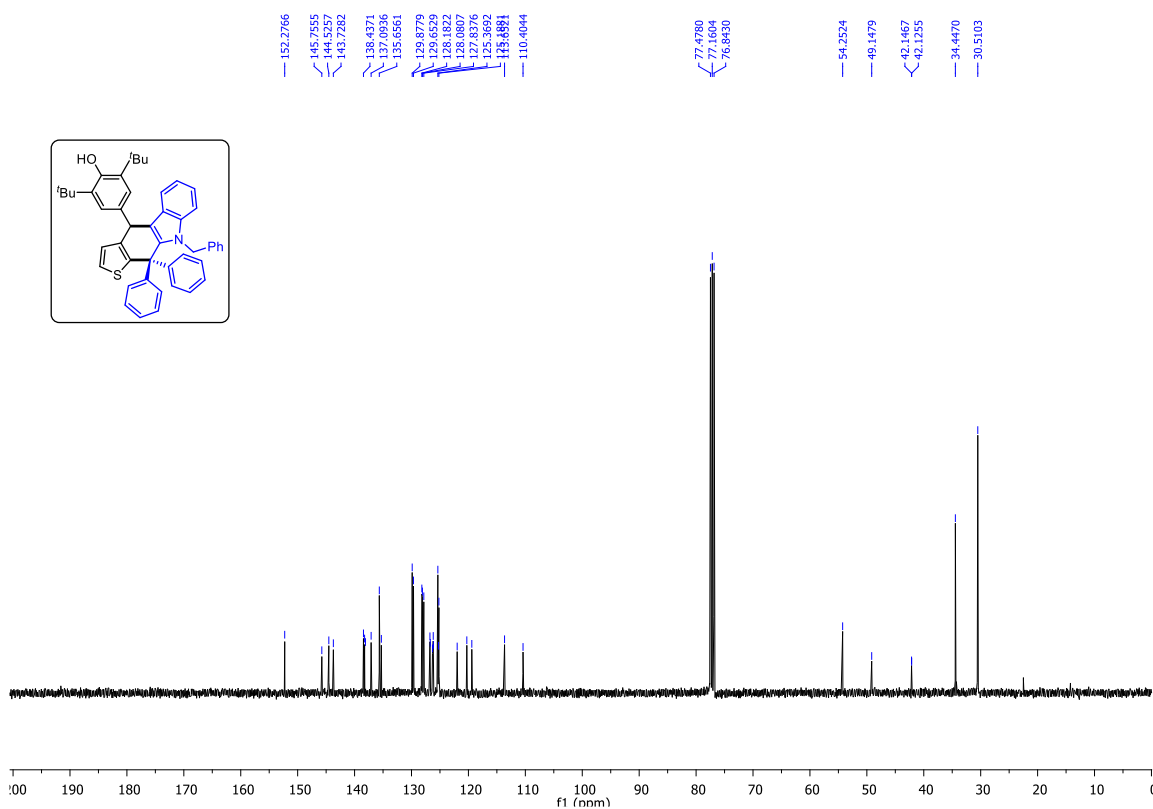

$^1\text{H}$  NMR (400 MHz,  $\text{DMSO-d}_6$ ) Spectrum of **5k**

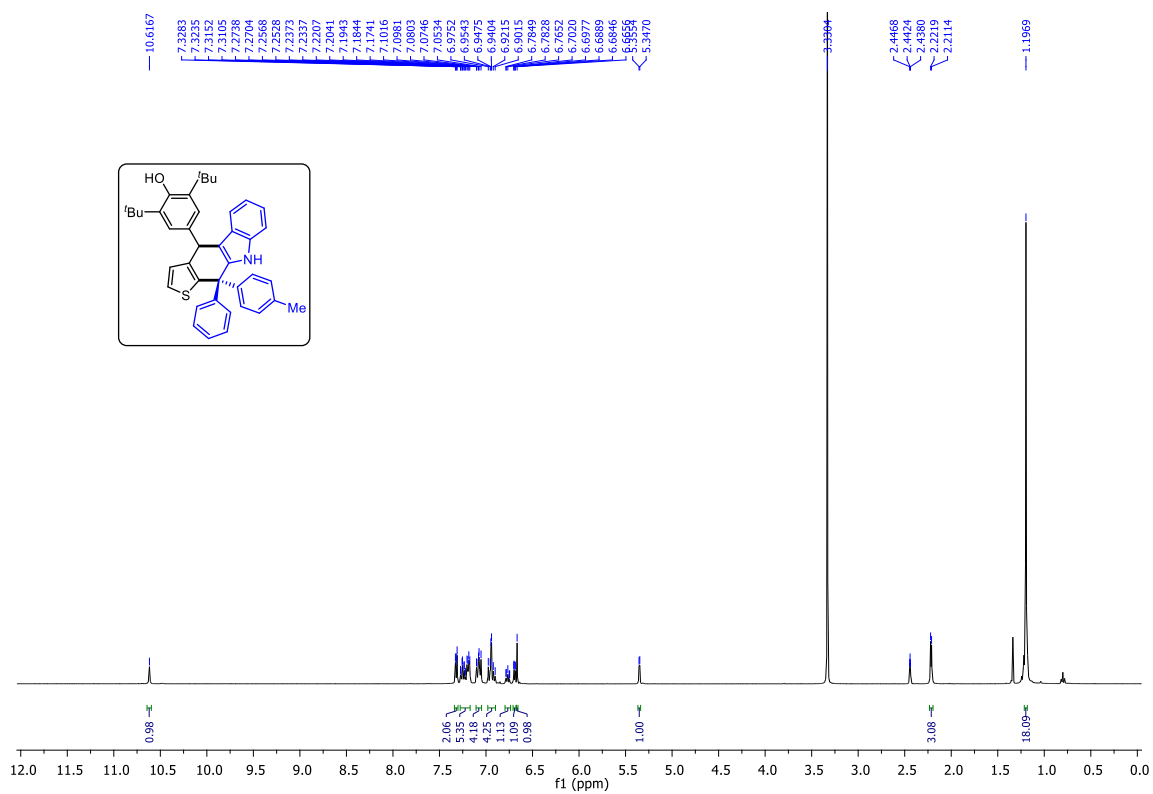

$^{13}\text{C}$   $\{^1\text{H}\}$  NMR (100 MHz, DMSO- $d_6$ ) Spectrum of **5k**

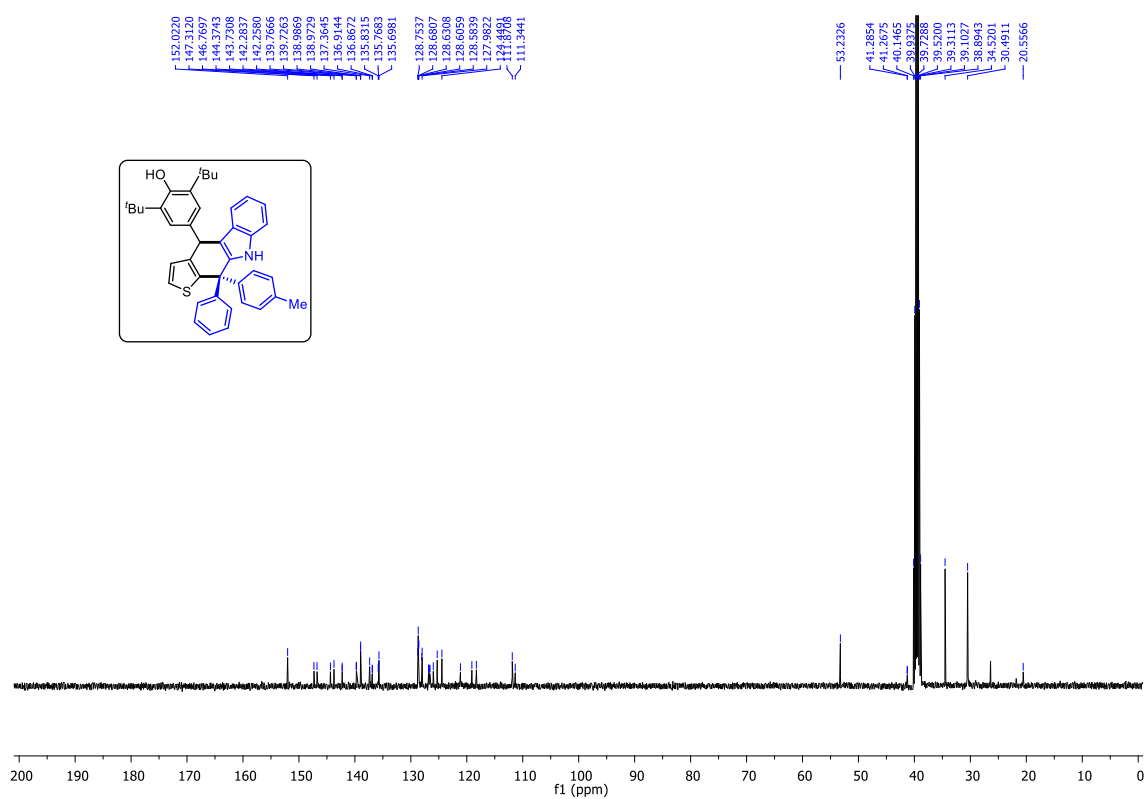

$^1\text{H}$  NMR (400 MHz, DMSO- $d_6$ ) Spectrum of **7a**

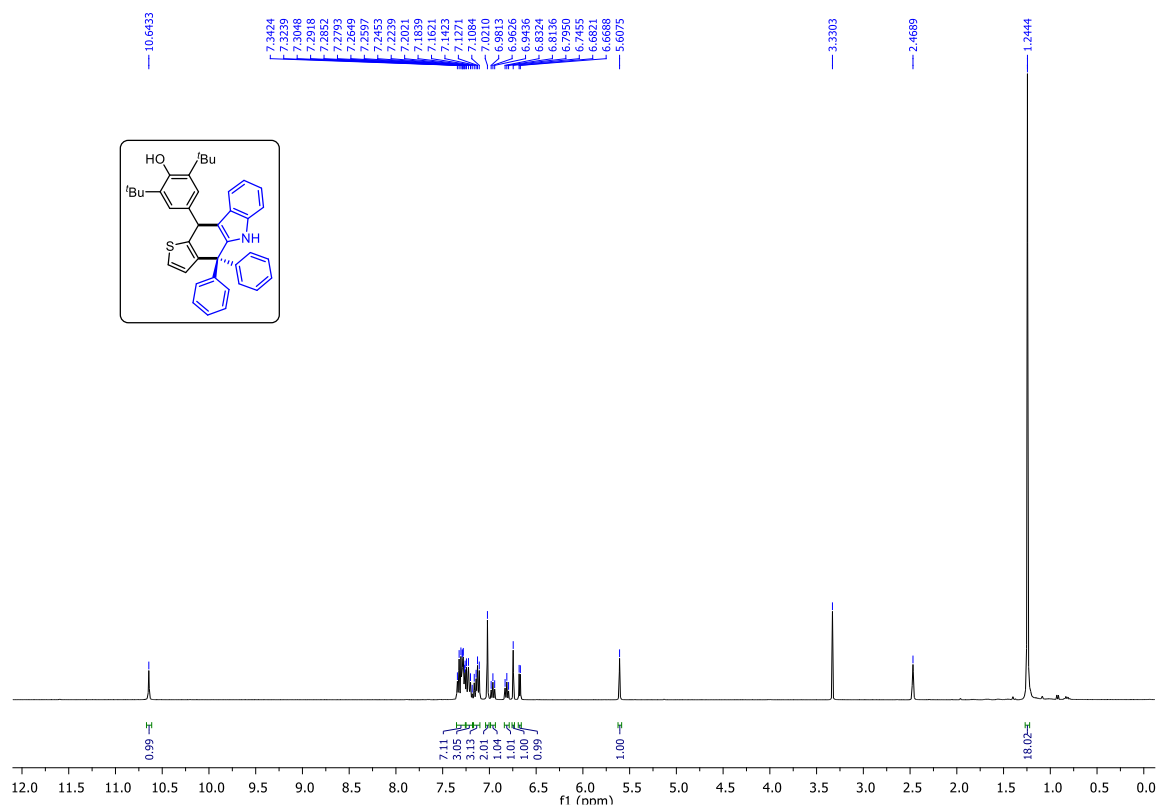

$^{13}\text{C}$   $\{^1\text{H}\}$  NMR (100 MHz, DMSO- $d_6$ ) Spectrum of **7a**

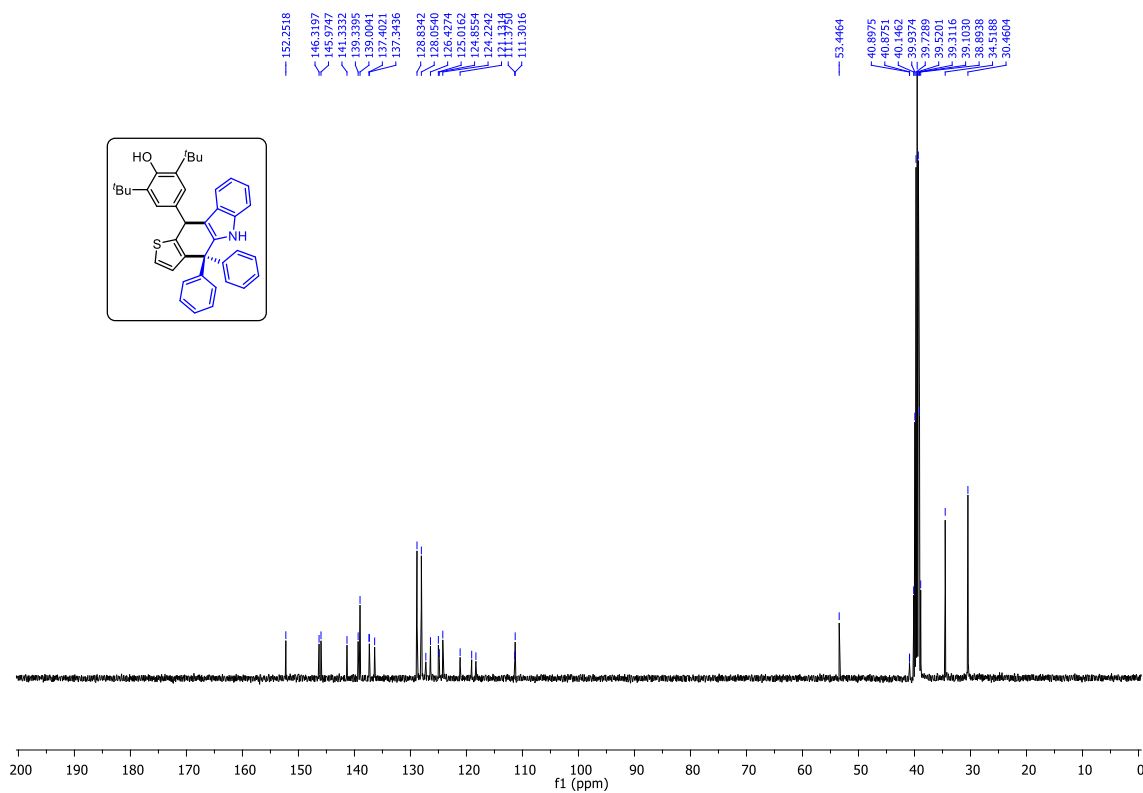

$^1\text{H}$  NMR (400 MHz, DMSO- $d_6$ ) Spectrum of **7b**

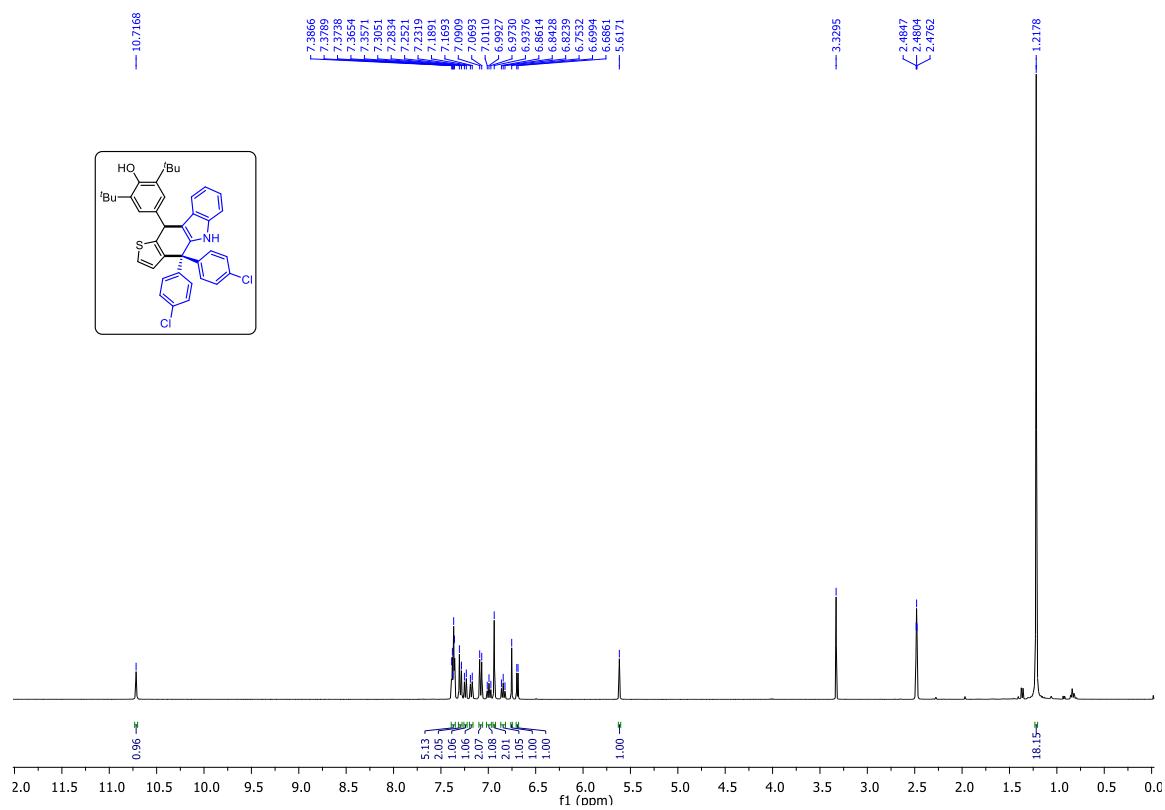

$^{13}\text{C}$   $\{^1\text{H}\}$  NMR (100 MHz, DMSO- $d_6$ ) Spectrum of **7b**

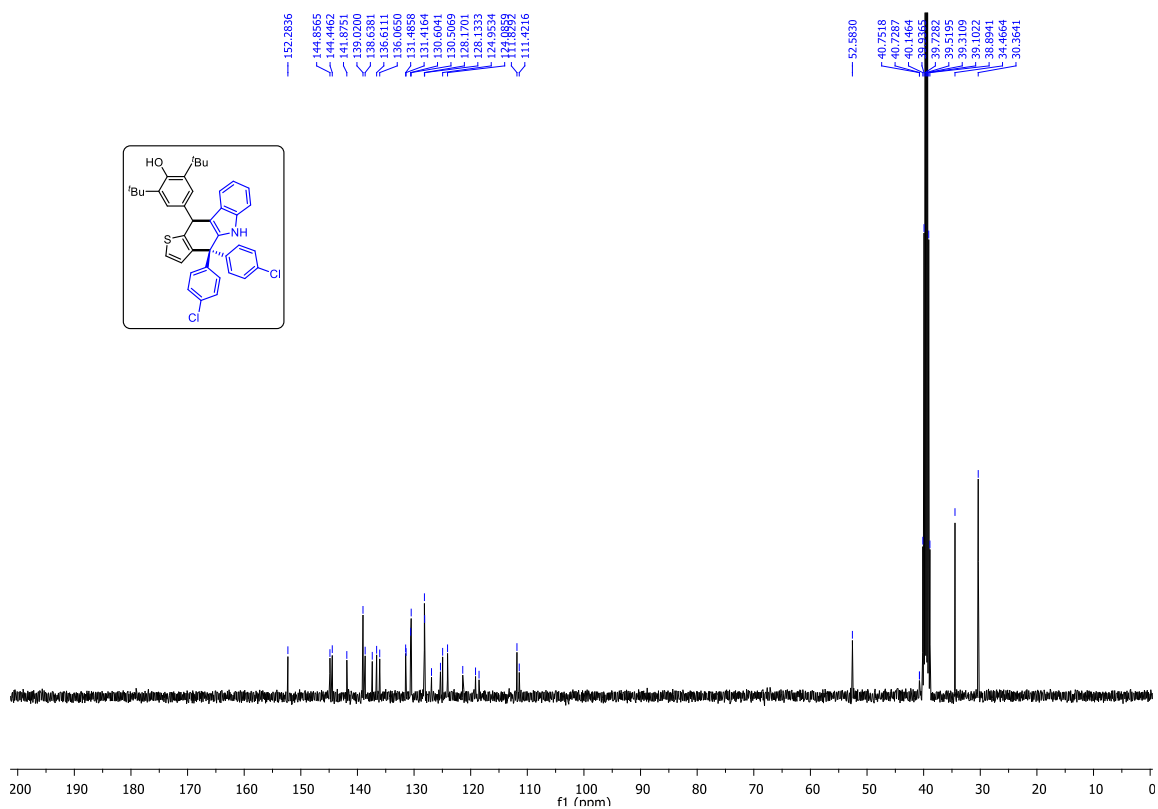

$^1\text{H}$  NMR (400 MHz, DMSO- $d_6$ ) Spectrum of **7c**

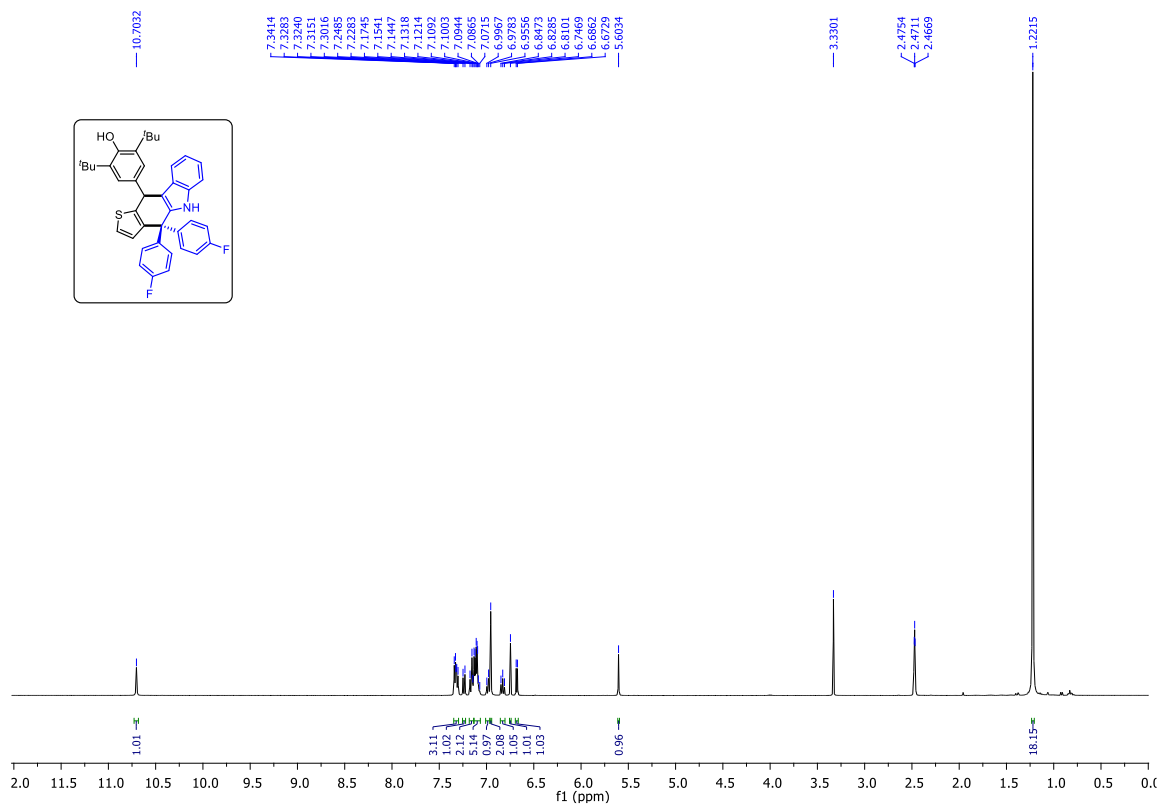

### $^{13}\text{C}$ { $^1\text{H}$ } NMR (100 MHz, DMSO- $d_6$ ) Spectrum of **7c**

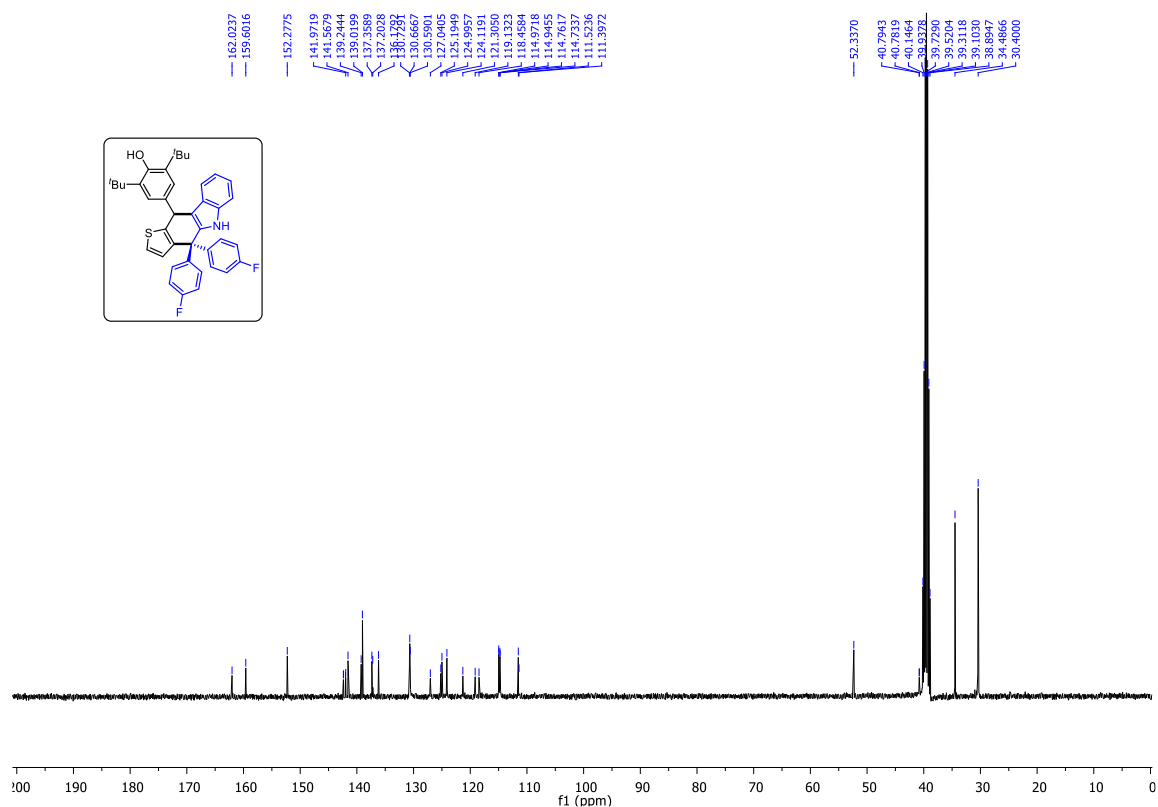

### $^{19}\text{F}$ { $^1\text{H}$ } NMR (376 MHz, DMSO- $d_6$ ) Spectrum of **7c**

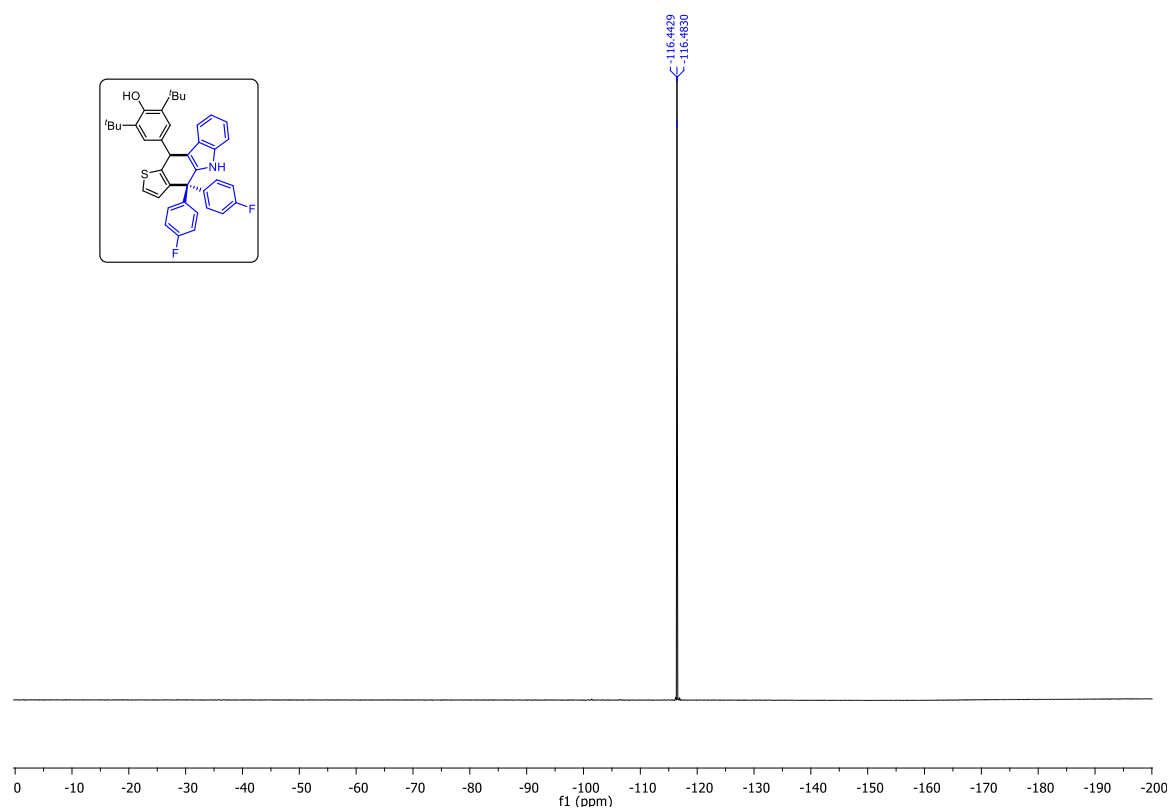

### <sup>1</sup>H NMR (400 MHz, DMSO-d<sub>6</sub>) Spectrum of **7d**

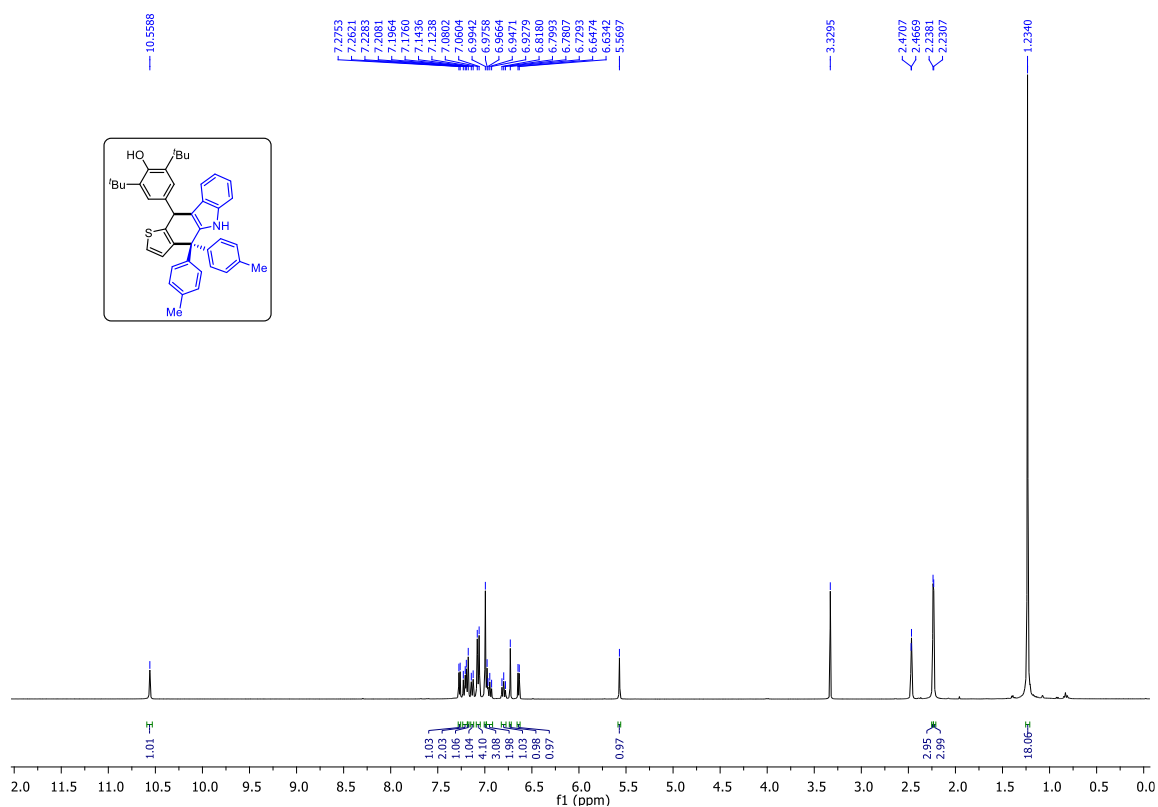

### <sup>13</sup>C {<sup>1</sup>H} NMR (100 MHz, DMSO-d<sub>6</sub>) Spectrum of **7d**

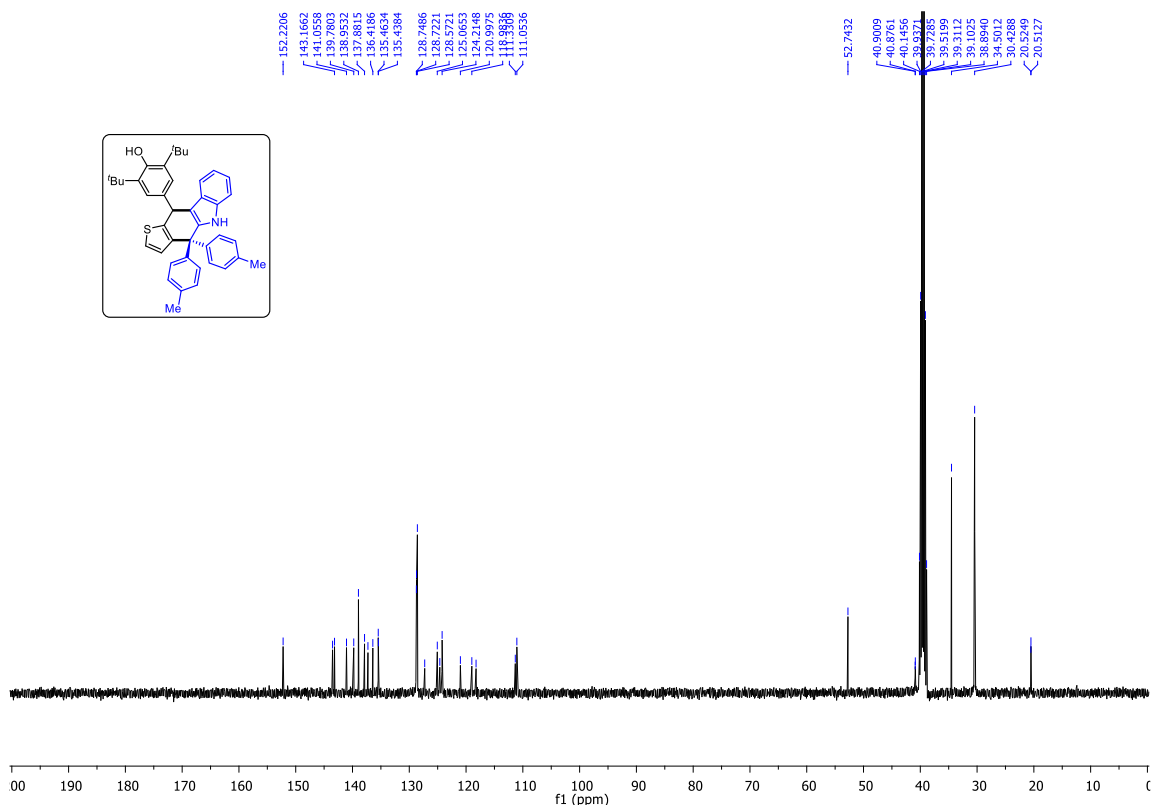



### <sup>1</sup>H NMR (400 MHz, DMSO-d<sub>6</sub>) Spectrum of **7e**

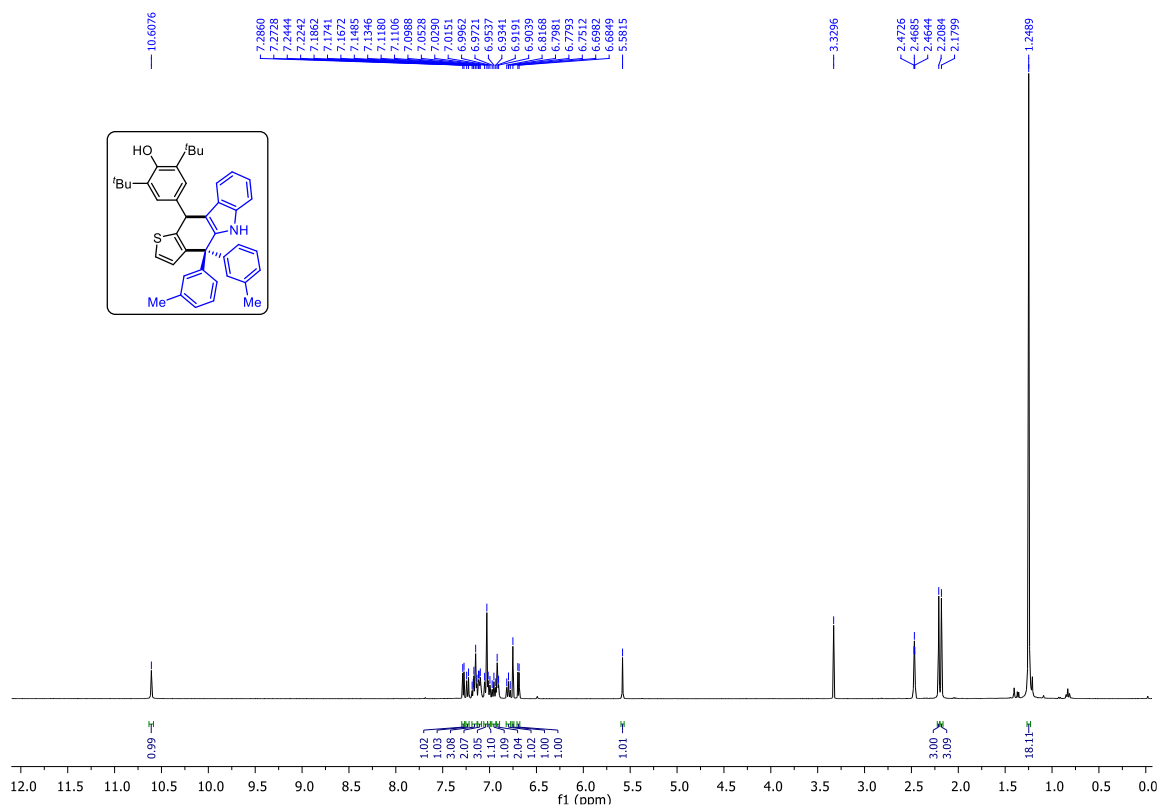

### <sup>13</sup>C {<sup>1</sup>H} NMR (100 MHz, DMSO-d<sub>6</sub>) Spectrum of **7e**

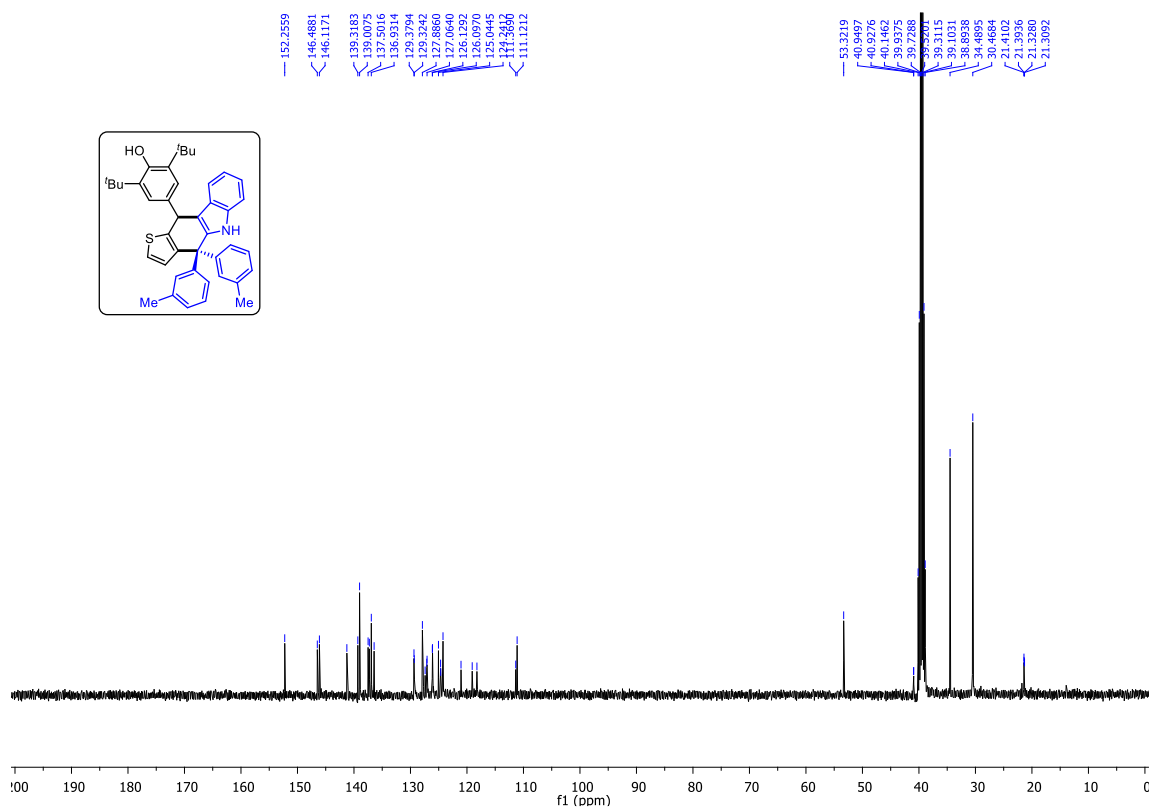

### $^1\text{H}$ NMR (400 MHz, DMSO- $d_6$ ) Spectrum of **7f**

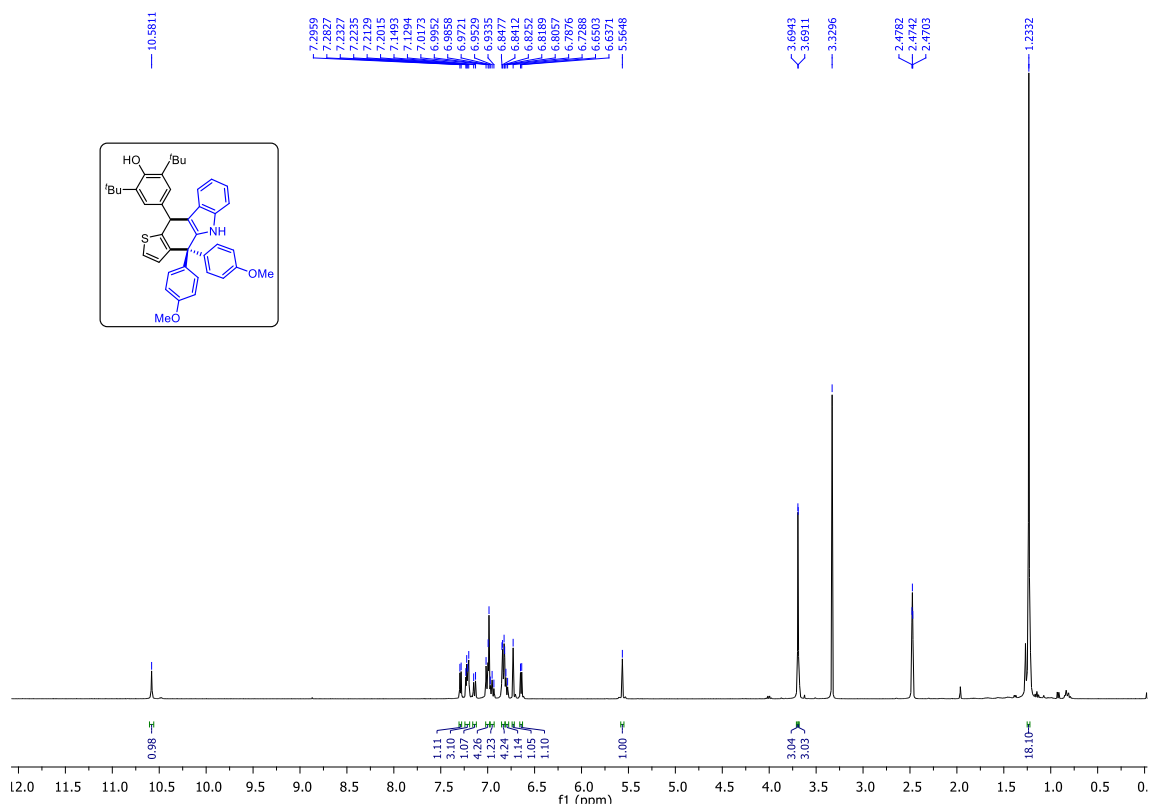

### $^{13}\text{C}$ { $^1\text{H}$ } NMR (100 MHz, DMSO- $d_6$ ) Spectrum of **7f**

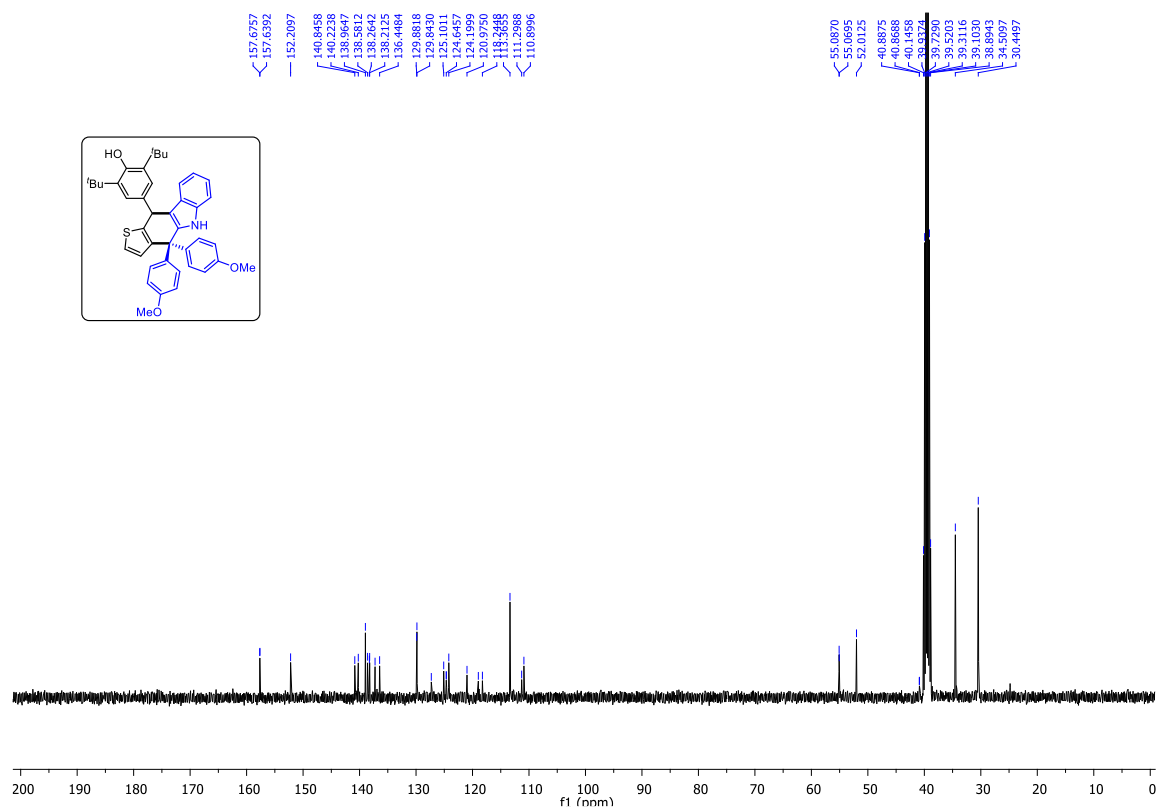

### <sup>1</sup>H NMR (400 MHz, DMSO-d<sub>6</sub>) Spectrum of **7g**

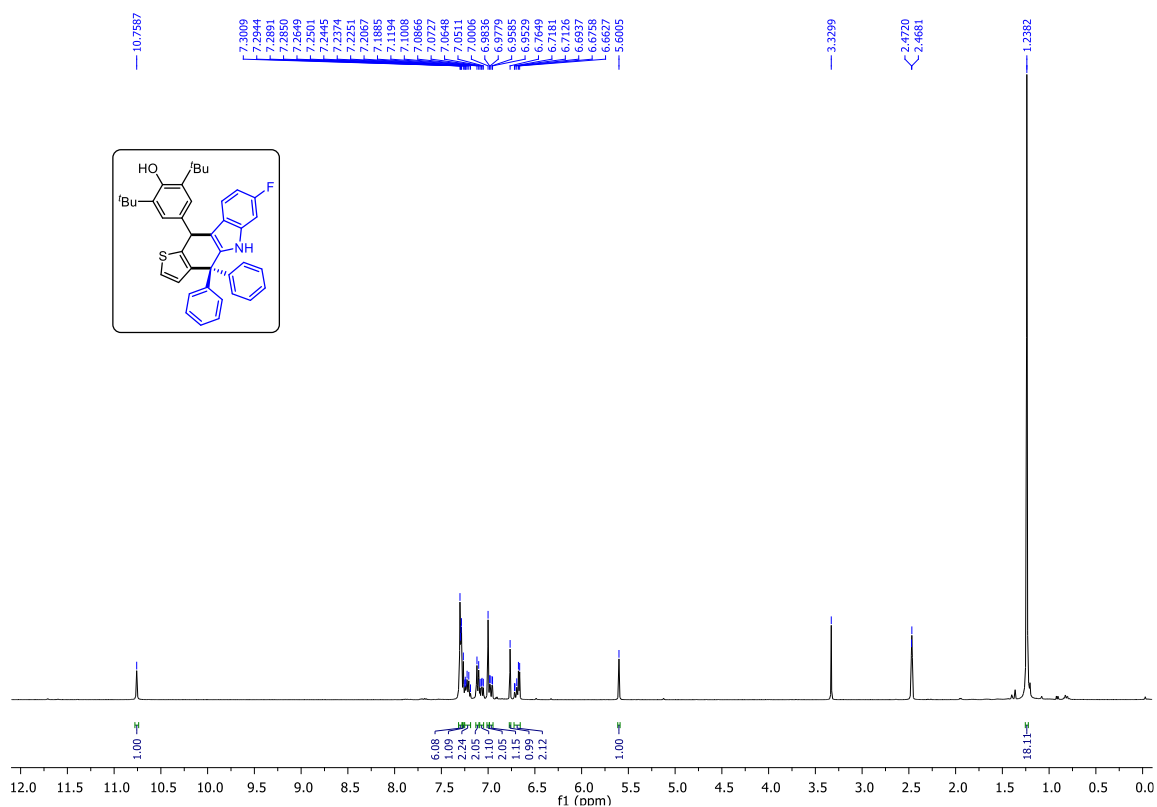

### <sup>13</sup>C {<sup>1</sup>H} NMR (100 MHz, DMSO-d<sub>6</sub>) Spectrum of **7g**

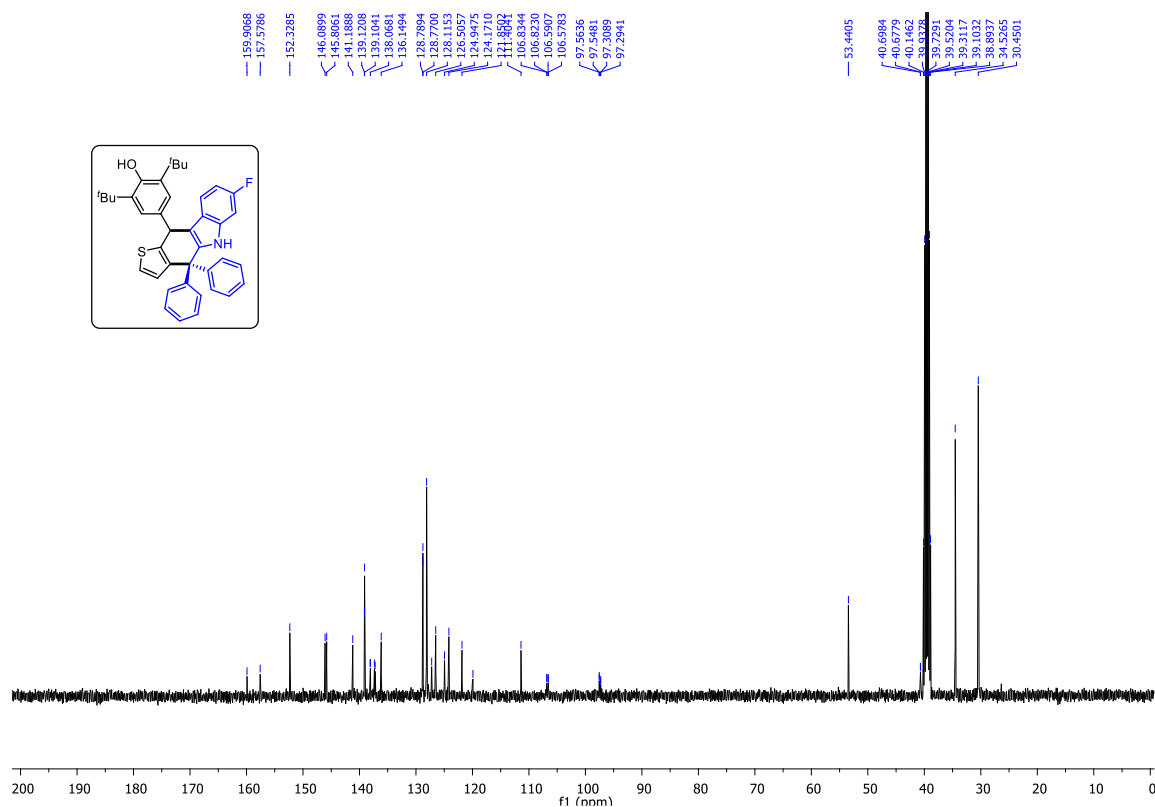

$^{19}\text{F}$   $\{^1\text{H}\}$  NMR (376 MHz, DMSO- $d_6$ ) Spectrum of **7g**

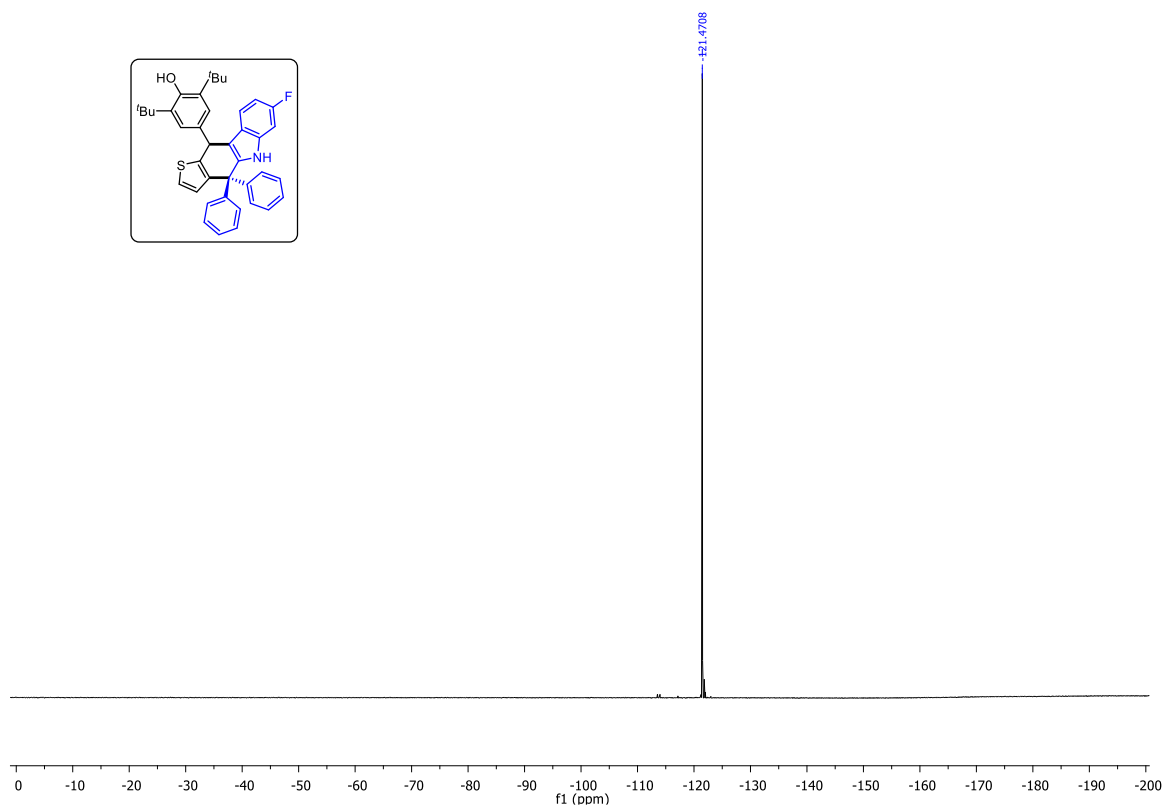

$^1\text{H}$  NMR (400 MHz, DMSO- $d_6$ ) Spectrum of **7h**

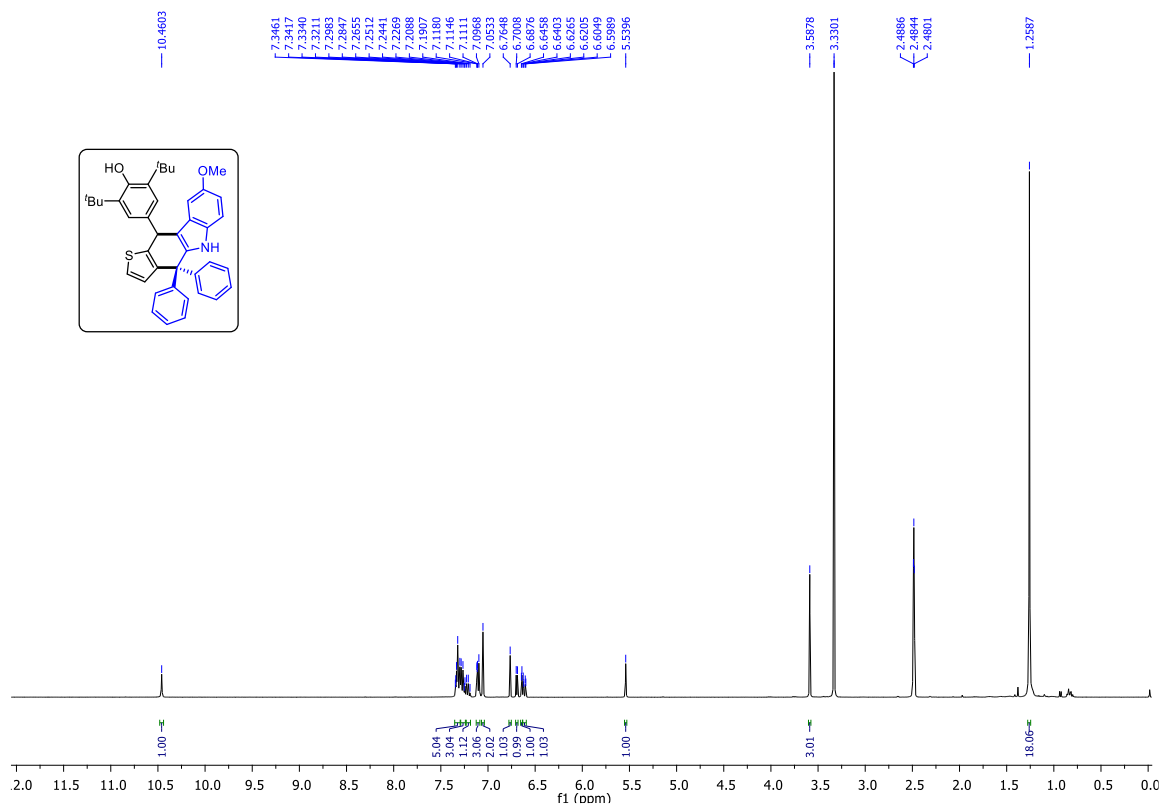

$^{13}\text{C}$   $\{^1\text{H}\}$  NMR (100 MHz, DMSO- $d_6$ ) Spectrum of **7h**

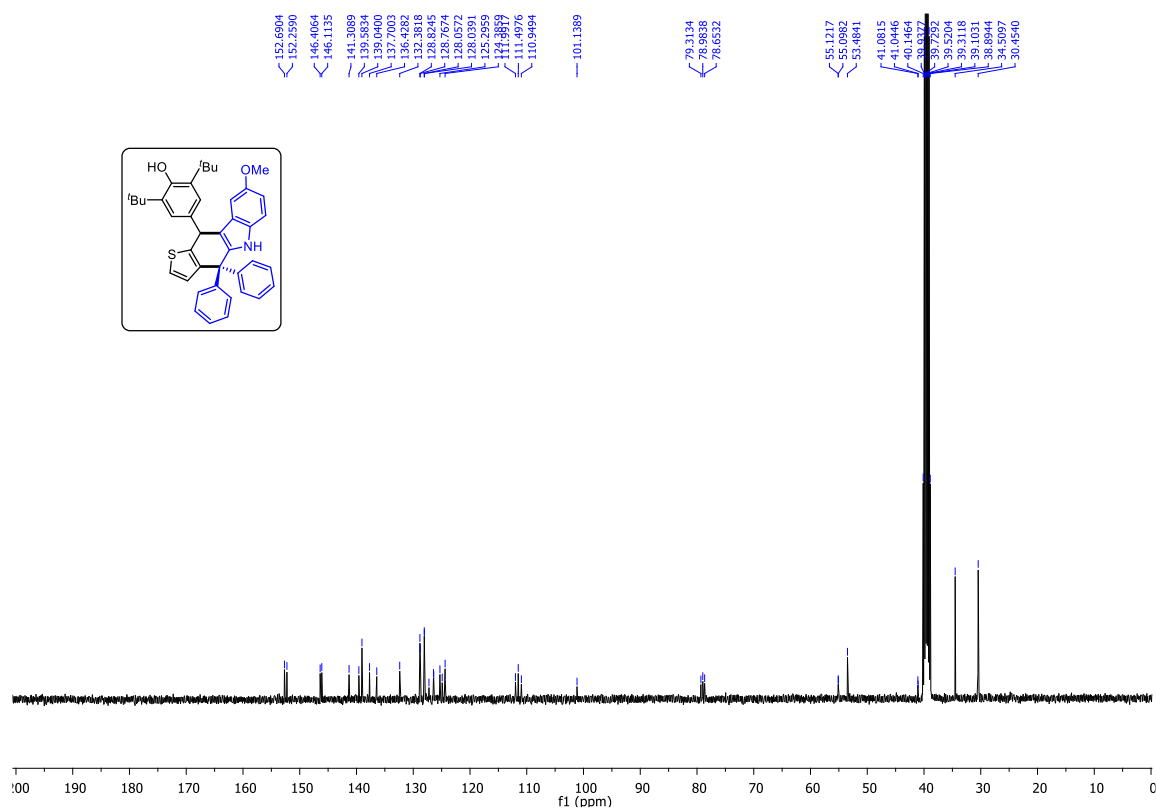

$^1\text{H}$  NMR (400 MHz,  $\text{CDCl}_3$ ) Spectrum of **7i**

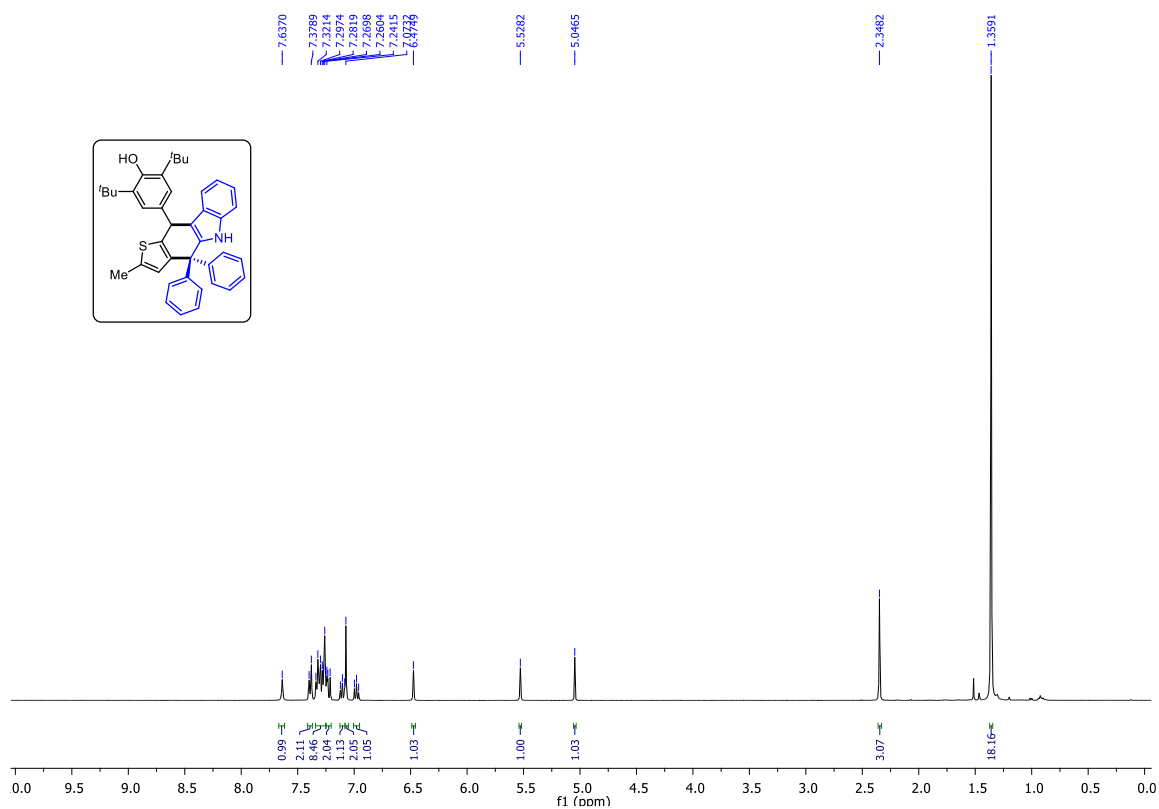

<sup>13</sup>C {<sup>1</sup>H} NMR (100 MHz, CDCl<sub>3</sub>) Spectrum of **7i**

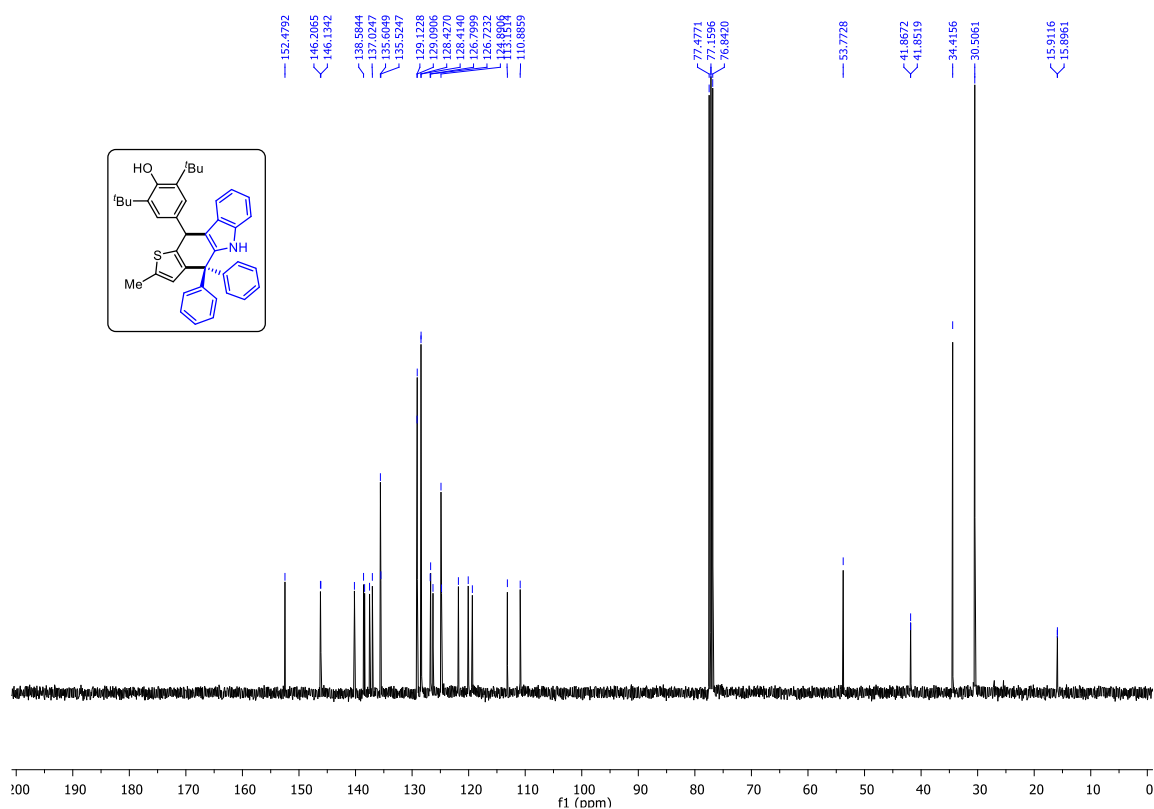

<sup>1</sup>H NMR (400 MHz, CDCl<sub>3</sub>) Spectrum of **7j**

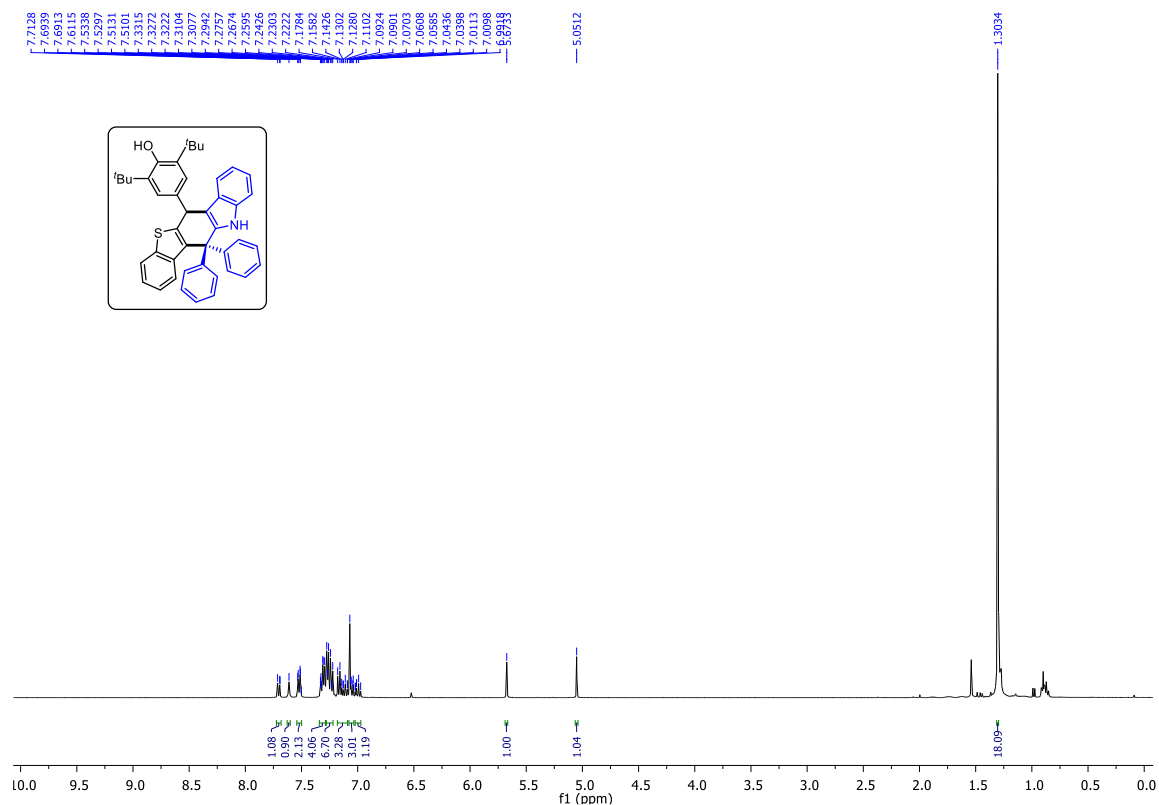

### $^{13}\text{C}$ { $^1\text{H}$ } NMR (100 MHz, $\text{CDCl}_3$ ) Spectrum of **7j**

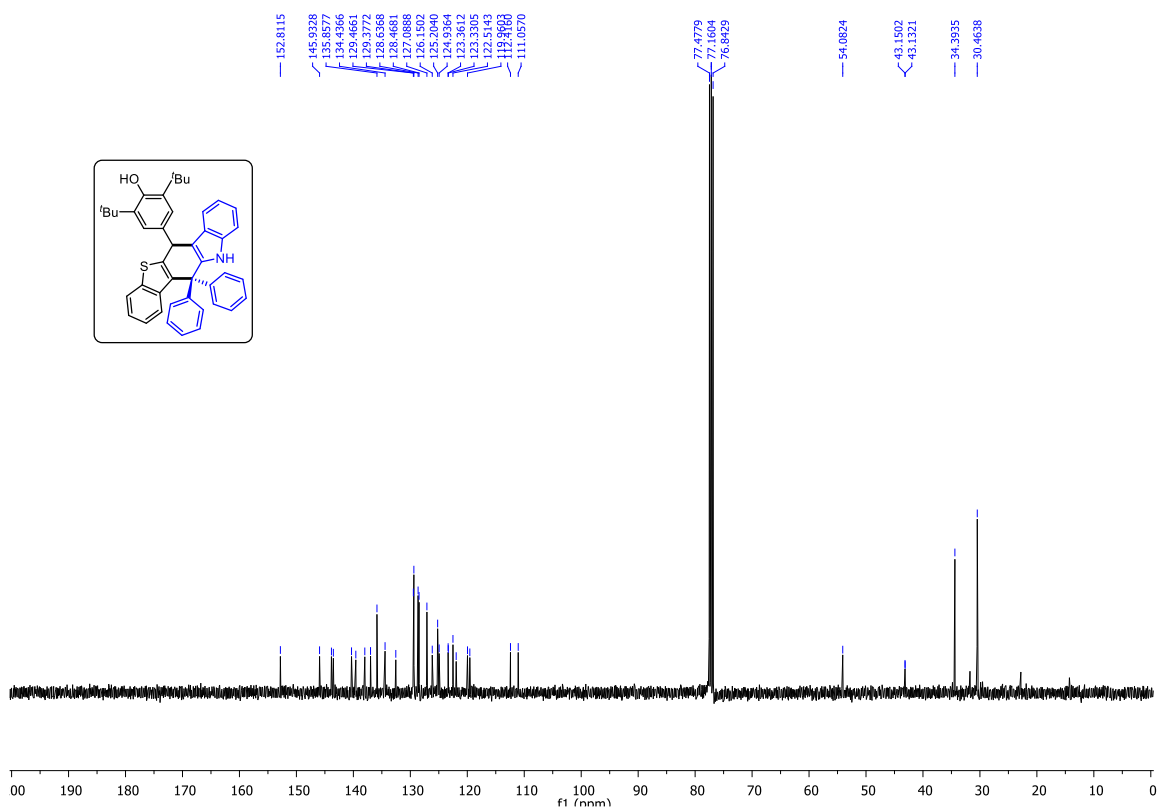

### $^1\text{H}$ NMR (400 MHz, $\text{DMSO-d}_6$ ) Spectrum of **7k**

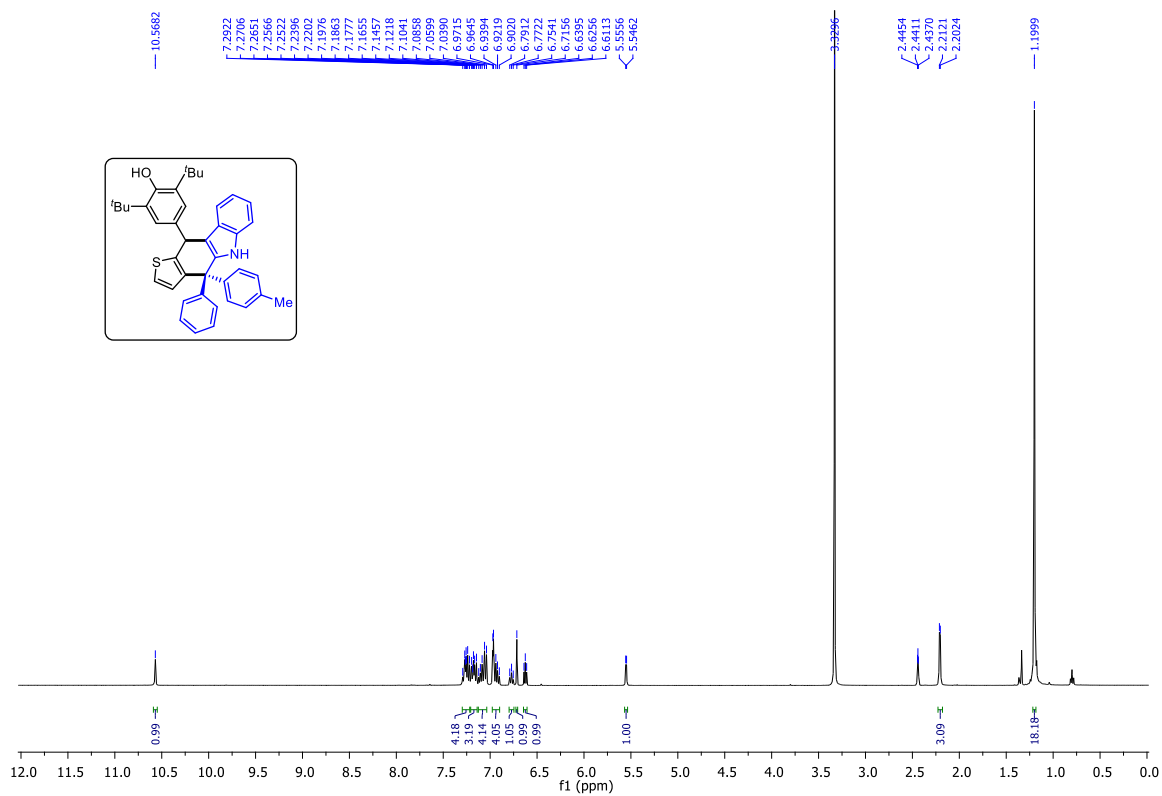

### $^{13}\text{C}$ $\{^1\text{H}\}$ NMR (100 MHz, DMSO- $d_6$ ) Spectrum of **7k**

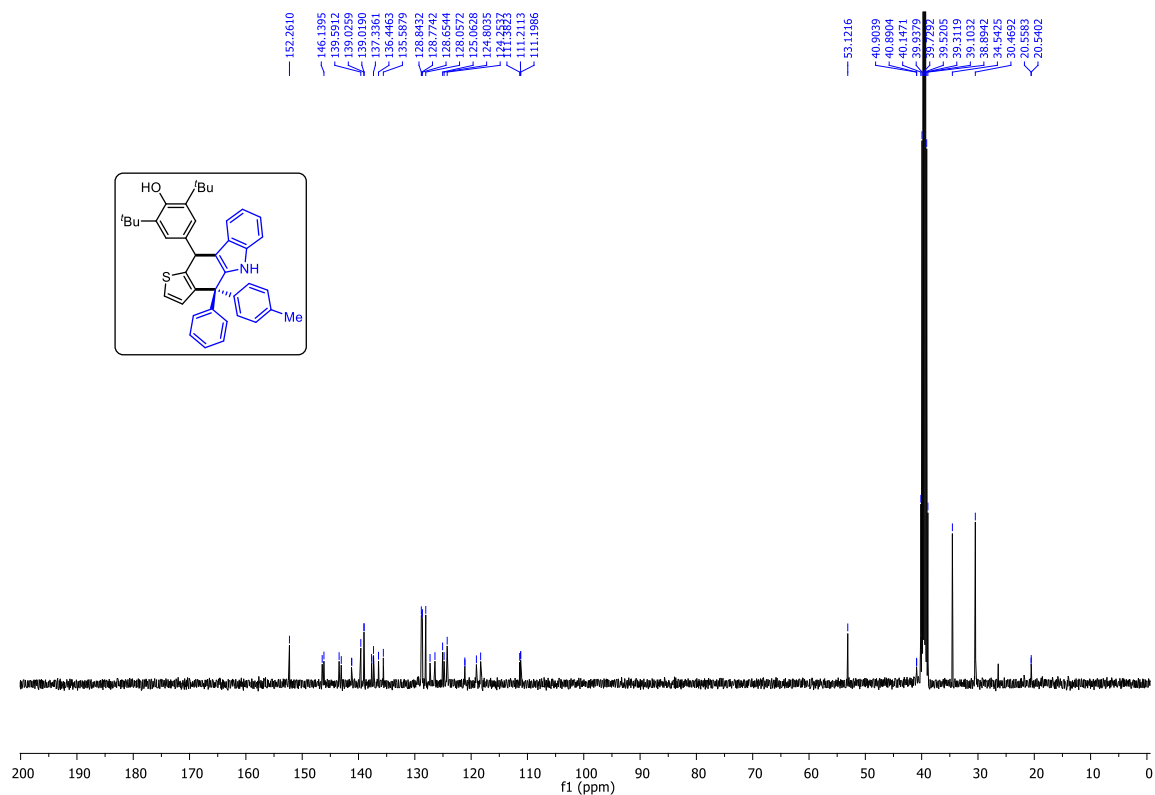

### Crude $^1\text{H}$ NMR (400 MHz, $\text{CDCl}_3$ ) Spectrum of **12**

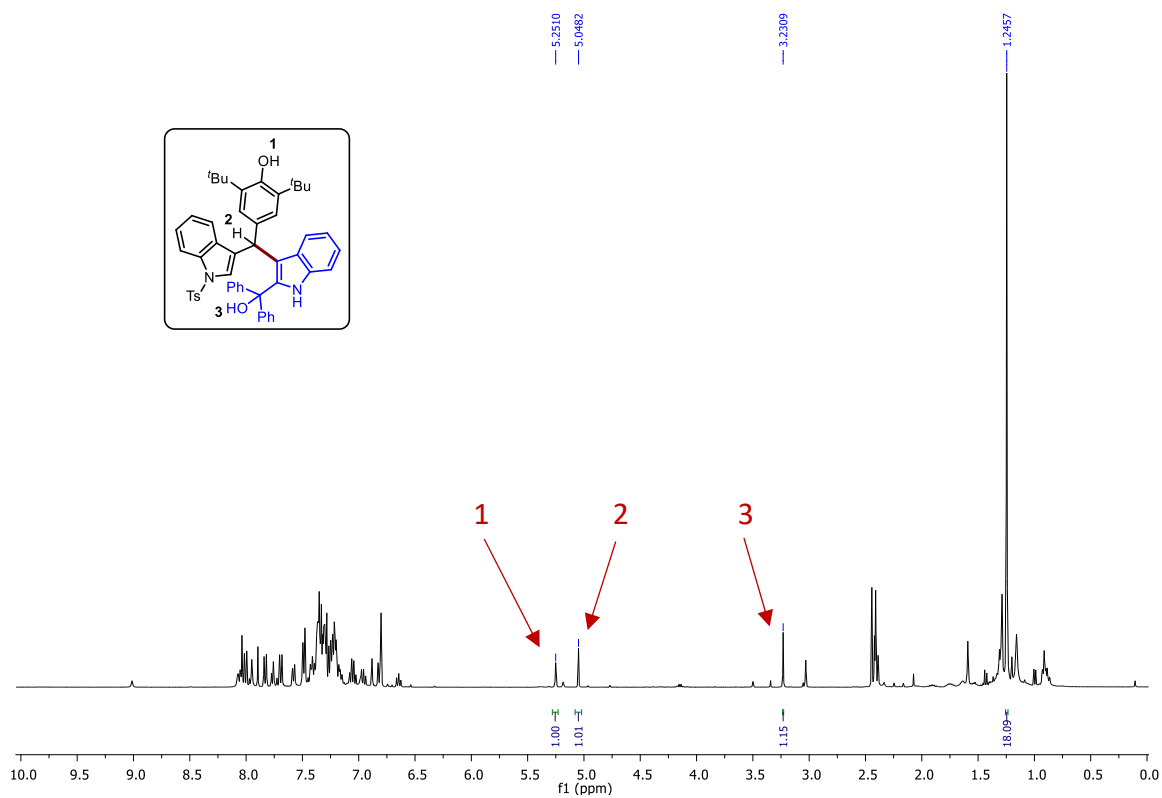

Supplement: d3ob00124e1.pdf [file d3ob00124e1.pdf]
